# Supplementary material for: Comprehensive studies of the ligand electronic effect on unsymmetrical α-diimine nickel(ii) promoted ethylene (co)polymerizations
Source: Royal Society of Chemistry journal article supplement (doi:10.1039/d0py00536c), 2020-01-01
Supplement: d0py00536c1.pdf [file d0py00536c1.pdf]

## Supplementary Information

### Comprehensive Studies of Ligand Electronic Effect on Unsymmetrical $\alpha$ -Diimine Nickel(II) Promoted Ethylene (Co)Polymerizations

Xiaoqiang Hu<sup>a,b</sup>, Chaoqun Wang<sup>a,b</sup>, Zhongbao Jian<sup>a,b,\*</sup>

<sup>a</sup> State Key Laboratory of Polymer Physics and Chemistry, Changchun Institute of Applied Chemistry, Chinese Academy of Sciences, Renmin Street 5625, Changchun 130022, China

<sup>b</sup> University of Science and Technology of China, Hefei 230026, China

### Contents

|                                                                                            |     |
|--------------------------------------------------------------------------------------------|-----|
| 1. General information                                                                     | S2  |
| 2. Preparation of ligands and catalysts                                                    | S3  |
| 3. General procedures for the polymerizations                                              | S14 |
| 4. Spectra Data.                                                                           | S15 |
| 4.1. <sup>1</sup> H, <sup>13</sup> C NMR of Ligand                                         | S15 |
| 4.2. <sup>1</sup> H, <sup>13</sup> C, <sup>1</sup> H- <sup>1</sup> H COSY NMR of Complexes | S25 |
| 5. NMR figures of (co)polymers                                                             | S30 |
| 6. GPC of (co)polymer                                                                      | S49 |
| 7. DSC of (co)polymer                                                                      | S74 |
| 8. MALDI-TOF-MS of complex Ni                                                              | S76 |
| 9. Crystallographic data and figures of crystal structure                                  | S79 |
| 10. References                                                                             | S81 |

## 1 General information

**General Procedures:** All syntheses involving air- and moisture sensitive compounds were carried out using standard Schlenk-type glassware (or in a glove box) under an atmosphere of nitrogen. All solvents were purified from the MBraun SPS system. NMR spectra for the ligands, complexes, and polymers were recorded on a Bruker AV400 ( $^1\text{H}$ : 400 MHz,  $^{13}\text{C}$ : 100 MHz,  $^{31}\text{P}$ : 162 MHz,  $^{19}\text{F}$ : 376 MHz) or a Bruker AV500 ( $^1\text{H}$ : 500 MHz,  $^{13}\text{C}$ : 125 MHz,  $^{31}\text{P}$ : 202 MHz,  $^{19}\text{F}$ : 470 MHz). NMR assignments were confirmed by  $^1\text{H}$ – $^1\text{H}$  COSY,  $^1\text{H}$ – $^{13}\text{C}$  HSQC and  $^1\text{H}$ – $^{13}\text{C}$  HMBC experiments when necessary. The molecular weights ( $M_n$ ) and molecular weight distributions ( $M_w/M_n$ ) of polyethylenes and copolymers were measured by means of gel permeation chromatography (GPC) on a PL-GPC 220-type high-temperature chromatograph equipped with three PL-gel 10  $\mu\text{m}$  Mixed-B LS type columns at 150  $^\circ\text{C}$ . Melting points ( $T_m$ ) of polyethylenes and copolymers were measured through DSC analyses, which were carried out on a Mettler TOPEM TM DSC Instruments under nitrogen atmosphere at heating and cooling rates of 10  $^\circ\text{C}/\text{min}$  (temperature range: 0–160  $^\circ\text{C}$ ). Mass spectra of the complexes were recorded on an Acquity UPLC & Quattro Premier. Elemental analysis were performed at the National Analytical Research Centre of Changchun Institute of Applied Chemistry. Stress/strain experiments were performed at 10 mm/min by means of a Universal Test Machine (UTM2502) at room temperature. Polymers were melt-pressed at 150  $^\circ\text{C}$  to obtain the test specimens, which have 12-mm gauge length, 2-mm width, and thickness of 0.5 mm. At least three specimens of each polymer were tested.

**X-Ray diffraction:** Data collections were performed at –88.5  $^\circ\text{C}$  or –100  $^\circ\text{C}$  on a Bruker SMART APEX diffractometer with a CCD area detector, using graphite-monochromated Cu K $\alpha$  radiation ( $\lambda = 1.54178 \text{ \AA}$ ). The determination of crystal class and unit cell parameters was carried out by the SMART program package.<sup>1</sup> The raw frame data were processed using SAINT and SADABS to yield the reflection data file.<sup>2</sup> All structures were solved by direct methods and refined by full-matrix least-squares procedures on  $F^2$  using Olex2.<sup>3</sup> Refinement was performed on  $F^2$  anisotropically for all non-hydrogen atoms by the full-matrix least-squares method. The hydrogen atoms were placed at the calculated positions and were included in the structure calculation without further refinement of the parameters.

**Exceptions and special features:** For complex **Cat1** and **Cat4**, the program SQUEEZE<sup>4</sup> was used to remove mathematically the effect of the solvent. The quoted formula and derived parameters are not included the squeezed solvent molecules.

**Materials:** 2,6-Bis(diphenylmethyl)-4-methoxyaniline<sup>5</sup>, 2,6-bis(diphenylmethyl)-4-chloroaniline<sup>5</sup>, 2,6-diphenylmethyl-4-methylaniline<sup>5</sup>, 2,6-bis(bis(4-methylphenyl)methyl)-4-methylaniline<sup>6</sup>, 2,6-bis(bis(4-fluorophenyl)methyl)-4-methylbenzenamine<sup>6</sup> and pentiptycene aminophenol<sup>7</sup> were prepared using literature procedure.

## 2 Preparation of Ligands and Catalysts

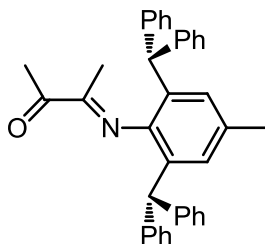

A solution of 2,6-diphenylmethyl-4-methylaniline (8.79 g, 20 mmol), 2,3-butanedione (8.61 g, 100 mmol) and *p*-toluenesulfonic acid (20 mg) in toluene (200 mL) was stirred at 80 °C for 24 h, the solvent was partially evaporated under reduced pressure until the formation of a yellow solid, and the remaining solution was diluted in methanol (300 mL). The yellow solid was isolated by filtration, washed three times by 20 mL methanol and dried under high vacuum. (8.14 g, 80.2% yield)

**<sup>1</sup>H NMR** (500 MHz, 298 K, CDCl<sub>3</sub>, 7.26 ppm): δ = 7.27-7.14(m, 12H, aryl-*H*), 7.03-7.00(m, 8H, aryl-*H*), 6.64 (s, 2H, aryl-*H*), 5.09 (s, 2H, CHPh<sub>2</sub>), 2.32 (s, 3H, O=C-*Me*), 2.15 (s, 3H, aryl- *Me*), 0.67 (s, 3H, N=C-*Me*)ppm.

**Elemental analysis:** Anal. Calcd for C<sub>37</sub>H<sub>33</sub>NO: C, 87.54; H, 6.55; N, 2.76. Found: C, 87.61; H, 6.52; N, 2.74.

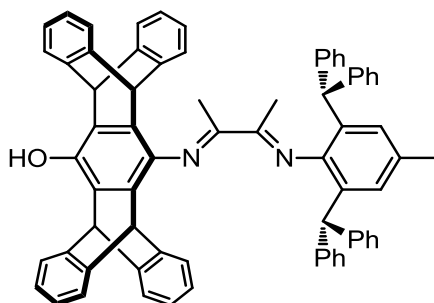

A solution of (2,6-dibenzhydryl -4-methylphenylimino) butanone (2.00 g, 3.94 mmol), pentiptycene aminophenol (2.18 g, 4.73 mmol) and *p*-toluenesulfonic acid (20 mg) in toluene (250 mL) was refluxed with Dean-stark trap for 3 days, the solvent was partially evaporated under reduced pressure until the formation of a yellow solid, and the remaining solution was diluted in methanol (300 mL). The yellow solid was isolated by filtration and recrystallized from hot methanol, washed three times by 20 mL hot methanol and dried under high vacuum. (2.64 g, 70.5% yield)

**<sup>1</sup>H NMR** (500 MHz, 298 K, CDCl<sub>3</sub>, 7.26 ppm): δ = 7.47-7.43(m, 4H, aryl-*H*), 7.36-7.28(m, 14H, aryl-*H*), 7.25-7.22(m, 4H, aryl-*H*), 7.19-7.16(m, 6H, aryl-*H*), 6.95-6.90(m, 8H, aryl-*H*), 6.73(s, 2H, aryl-*H*), 5.65(s, 2H, CHAr<sub>3</sub>), 5.48(s, 2H, CHPh<sub>2</sub>), 4.97(s, 2H, CHAr<sub>3</sub>), 4.63(s, 1H, OH), 2.23(s, 3H, aryl-*Me*), 1.73 (s, 3H, N=C-*Me*), 1.19 (s, 3H, N=C-*Me*)ppm.

**Elemental analysis:** Anal. Calcd for C<sub>71</sub>H<sub>54</sub>N<sub>2</sub>O: C, 89.65; H, 5.72; N, 2.95. Found: C, 89.61; H, 5.68; N, 2.91.

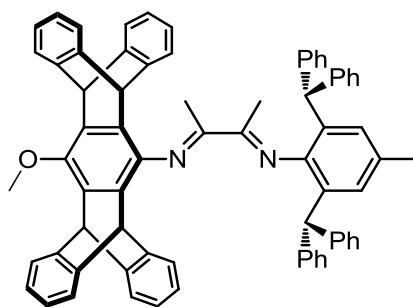

**Preparation of Ligand L1:** To the solution of 2-(2,6-dibenzhydryl-4-methylphenylimino)-3-pentiptycene aminophenol butane (2.64 g, 2.78 mmol) in DMF (200 mL) at 50 °C was added  $K_2CO_3$  (4.61 g, 33.36 mmol). The mixture was stirred for 1 min and MeI (1.64 g, 11.12 mmol) was added. The reaction mixture was stirred overnight at 50 °C. The yellow suspension was cooled to room temperature and poured into 300 mL of water. The yellow precipitate was collected by filtration, washed with water, methanol and diethyl ether. After drying in vacuo at 70 °C, the product was obtained as a yellow powder (2.02 g, 75.4% yield).

**$^1H$  NMR** (500 MHz, 298 K,  $CDCl_3$ , 7.26 ppm):  $\delta$  = 7.46-7.43(m, 4H, aryl-*H*), 7.35-7.28(m, 14H, aryl-*H*), 7.25-7.22(m, 4H, aryl-*H*), 7.19-7.15(m, 6H, aryl-*H*), 6.96-6.90(m, 8H, aryl-*H*), 6.73(s, 2H, aryl-*H*), 5.70(s, 2H,  $CHAr_3$ ), 5.48(s, 2H,  $CHPh_2$ ), 4.97(s, 2H,  $CHAr_3$ ), 3.90(s, 3H,  $OCH_3$ ), 2.22(s, 3H, aryl-*Me*), 1.75 (s, 3H,  $N=C-Me$ ), 1.16 (s, 3H,  $N=C-Me$ )ppm.

**$^{13}C\{^1H\}$  NMR** (125 MHz, 298 K,  $CDCl_3$ , 77.16 ppm):  $\delta$  = 170.43 ( $N=C-Me$ ), 170.39 ( $N=C-Me$ ), 146.90, 145.83, 145.74, 145.43, 145.33, 145.23, 143.96, 142.99, 138.16, 135.61, 132.22, 131.59, 131.55, 130.03, 129.70, 129.21, 128.87, 128.44, 126.73, 126.45, 125.36, 125.33, 125.25, 125.19, 123.76, 123.74, 123.65, 123.45, , 63.23( $OCH_3$ ), 52.52, 49.24, 48.33, 21.52(aryl-*Me*), 17.33( $N=C-Me$ ), 16.65( $N=C-Me$ )ppm.

**Elemental analysis:** Anal. Calcd for  $C_{72}H_{56}N_2O$ : C, 89.59; H, 5.85; N, 2.90. Found: C, 89.82; H, 5.81; N, 2.98.

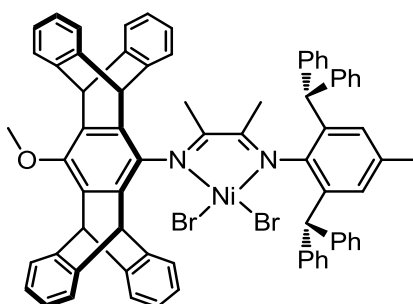

**Preparation of Cat1:** A mixture of **L1** (220 mg, 0.228 mmol) and (DME)NiBr<sub>2</sub> (70.3 mg, 0.228 mmol) (DME = 1,2-dimethoxyethane) were stirred in 25 mL of dichloromethane overnight at room temperature. The solvent was evaporated under reduced pressure, the desired compound can be isolated from repeated recrystallized from n-hexane and dichloromethane. The pure compound was obtained as an orange solid. (218 mg, 80.7% yield).

MALDI-TOF-MS (*m/z*): 1022.4 [ $M-2Br$ ]<sup>+</sup>, 1057.3 [ $M-2Br+Cl$ ]<sup>+</sup>, 1101.3 [ $M-Br$ ]<sup>+</sup>.

**Elemental analysis:** Anal. Calcd for  $C_{72}H_{56}Br_2N_2NiO$ : C, 73.05; H, 4.77; N, 2.37. Found: C, 73.23; H, 4.89; N, 2.45.

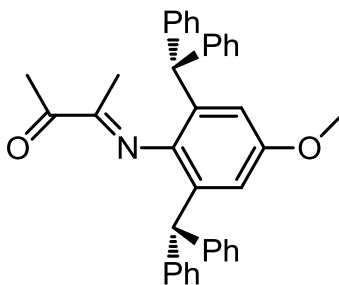

A solution of 2,6-bis(diphenylmethyl)-4-methoxyaniline (9.11 g, 20 mmol), 2,3-butanedione (8.61 g, 100 mmol) and *p*-toluenesulfonic acid (20 mg) in toluene (200 mL) was stirred at 80 °C for 24 h, the solvent was partially evaporated under reduced pressure until the formation of a yellow solid, and the remaining solution was diluted in methanol (300 mL). The yellow solid was isolated by filtration, washed three times by 20 mL methanol and dried under high vacuum. (7.40 g, 70.7% yield)

**$^1H$  NMR** (500 MHz, 298 K,  $CDCl_3$ , 7.26 ppm):  $\delta$  = 7.27-7.15(m, 12H, aryl-*H*), 7.03-7.02(m, 8H, aryl-*H*), 6.42 (s, 2H, aryl-*H*), 5.11 (s, 2H,  $CHPh_2$ ), 3.54 (s, 3H,  $OCH_3$ ), 2.30 (s, 3H,  $O=C-Me$ ), 0.71 (s, 3H,  $N=C-Me$ )ppm

**Elemental analysis:** Anal. Calcd for  $C_{37}H_{33}NO_2$ : C, 84.86; H, 6.35; N, 2.67. Found: C, 84.73; H, 6.31; N, 2.63.

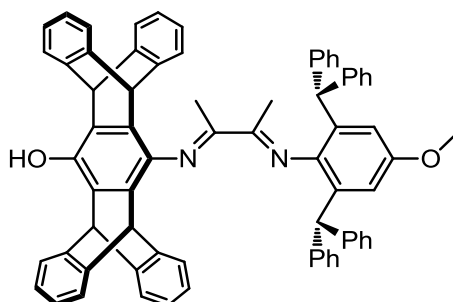

A solution of (2,6-dibenzhydryl -4-methoxyphenylimino) butanone (2.00 g, 3.82 mmol), pentiptycene aminophenol (2.12 g, 4.58 mmol) and *p*-toluenesulfonic acid (20 mg) in toluene (250 mL) was refluxed with Dean-stark trap for 3 days, the solvent was partially evaporated under reduced pressure until the formation of a yellow solid, and the remaining solution was diluted in methanol (300 mL). The yellow solid was isolated by filtration and recrystallized from hot methanol, washed three times by 20 mL hot methanol and dried under high vacuum. (2.80g, 75.7% yield)

**$^1H$  NMR** (500 MHz, 298 K,  $CDCl_3$ , 7.26 ppm):  $\delta$  = 7.47-7.44(m, 4H, aryl-*H*), 7.36-7.29(m, 14H, aryl-*H*), 7.25-7.22(m, 4H, aryl-*H*), 7.18-7.17(m, 6H, aryl-*H*), 6.96-6.90(m, 8H, aryl-*H*), 6.51(s, 2H, aryl-*H*), 5.65(s, 2H,  $CHAr_3$ ), 5.50(s, 2H,  $CHPh_2$ ), 4.96(s, 2H,  $CHAr_3$ ), 4.63(s, 1H, OH), 3.60(s, 3H,  $OCH_3$ ), 1.72 (s, 3H,  $N=C-Me$ ), 1.23 (s, 3H,  $N=C-Me$ )ppm

**Elemental analysis:** Anal. Calcd for  $C_{71}H_{54}N_2O_2$ : C, 88.17; H, 5.63; N, 2.90. Found: C, 87.98; H, 5.55; N, 2.81.

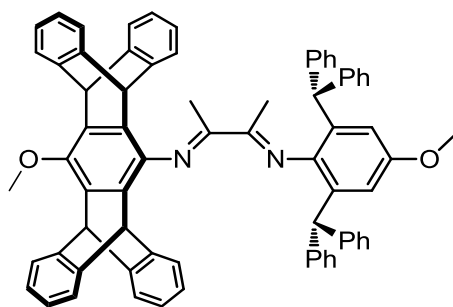

**Preparation of Ligand L2:** To the solution of 2-(2,6-dibenzhydryl-4-methoxyphenylimino)-3-pentiptycene aminophenol butane (2.80 g, 2.89 mmol) in DMF (200 mL) at 50 °C was added  $\text{K}_2\text{CO}_3$  (4.80 g, 34.68 mmol). The mixture was stirred for 1 min and MeI (1.64 g, 11.56 mmol) was added. The reaction mixture was stirred overnight at 50 °C. The yellow suspension was cooled to room temperature and poured into 300 mL of water. The yellow precipitate was collected by filtration, washed with water, methanol and diethyl ether. After drying in vacuo at 70 °C, the product was obtained as a yellow powder (2.24 g, 78.9% yield).

$^1\text{H}$  NMR (500 MHz, 298 K,  $\text{CDCl}_3$ , 7.26 ppm):  $\delta$  = 7.39-7.36(m, 4H, aryl-*H*), 7.28-7.22(m, 14H, aryl-*H*), 7.17-7.14(m, 4H, aryl-*H*), 7.11-7.09(m, 6H, aryl-*H*), 6.88-6.83(m, 8H, aryl-*H*), 6.44(s, 2H, aryl-*H*), 5.63(s, 2H,  $\text{CHAr}_3$ ), 5.42(s, 2H,  $\text{CHPh}_2$ ), 4.89(s, 2H,  $\text{CHAr}_3$ ), 3.83(s, 3H,  $\text{OCH}_3$ ), 3.52(s, 3H,  $\text{OCH}_3$ ), 1.67 (s, 3H,  $\text{N}=\text{C-Me}$ ), 1.13 (s, 3H,  $\text{N}=\text{C-Me}$ ) ppm

$^{13}\text{C}\{^1\text{H}\}$  NMR (125 MHz, 298 K,  $\text{CDCl}_3$ , 77.16 ppm):  $\delta$  = 171.00 ( $\text{N}=\text{C-Me}$ ), 170.49 ( $\text{N}=\text{C-Me}$ ), 155.53, 146.91, 145.74, 145.43, 145.33, 145.23, 143.58, 142.73, 141.89, 138.16, 135.62, 133.07, 131.55, 129.98, 129.66, 128.91, 128.50, 125.37, 125.33, 125.19, 123.75, 123.66, 123.45, 114.34, 63.23( $\text{OCH}_3$ ), 55.34( $\text{OCH}_3$ ), 52.68, 49.25, 48.34, 17.34( $\text{N}=\text{C-Me}$ ), 16.65( $\text{N}=\text{C-Me}$ ) ppm

**Elemental analysis:** Anal. Calcd for  $\text{C}_{72}\text{H}_{56}\text{N}_2\text{O}_2$ : C, 88.13; H, 5.75; N, 2.85. Found: C, 88.02; H, 5.66; N, 2.92.

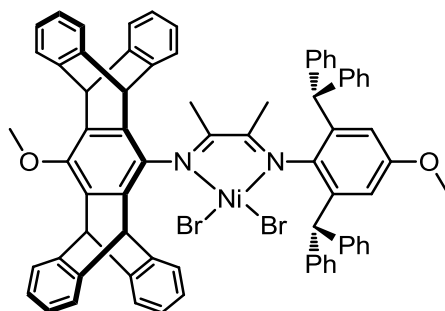

**Preparation of Cat2:** A mixture of **L2** (220 mg, 0.224 mmol) and  $(\text{DME})\text{NiBr}_2$  (69.2 mg, 0.224 mmol) (DME = 1,2-dimethoxyethane) were stirred in 25 mL of dichloromethane overnight at room temperature. the solvent was evaporated under reduced pressure, the desired compound can be isolated from repeated recrystallized from n-hexane and dichloromethane. The pure compound was obtained as an orange solid. (235 mg, 87.5% yield).

MALDI-TOF-MS ( $m/z$ ) : 1038.4  $[\text{M}-2\text{Br}]^+$ , 1073.3  $[\text{M}-2\text{Br}+\text{Cl}]^+$ , 1117.3  $[\text{M}-\text{Br}]^+$ .

**Elemental analysis:** Anal. Calcd for  $C_{72}H_{56}Br_2N_2NiO_2$ : C, 72.08; H, 4.70; N, 2.33. Found: C, 72.34; H, 4.78; N, 2.41.

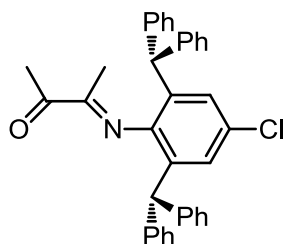

A solution of 2,6-diphenylmethyl-4-chloroaniline (9.20 g, 20 mmol), 2,3-butanedione (8.61 g, 100 mmol) and *p*-toluenesulfonic acid (20 mg) in toluene (200 mL) was stirred at 80 °C for 24 h, the solvent was partially evaporated under reduced pressure until the formation of a yellow solid, and the remaining solution was diluted in methanol (300 mL). The yellow solid was isolated by filtration, washed three times by 20 mL methanol and dried under high vacuum. (8.68 g, 82.2% yield)

**$^1H$  NMR** (500 MHz, 298 K,  $CDCl_3$ , 7.26 ppm):  $\delta$  = 7.29-7.17(m, 12H, aryl-*H*), 7.01-6.99(m, 8H, aryl-*H*), 6.82 (s, 2H, aryl-*H*), 5.08 (s, 2H,  $CHPh_2$ ), 2.30 (s, 3H,  $O=C-Me$ ), 0.66 (s, 3H,  $N=C-Me$ )ppm.

**Elemental analysis:** Anal. Calcd for  $C_{36}H_{30}ClNO$ : C, 81.88; H, 5.73; N, 2.65. Found: C, 81.72; H, 5.86; N, 2.78.

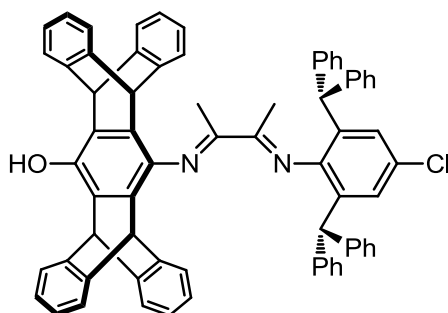

A solution of (2,6-dibenzhydryl -4-chlorophenylimino) butanone (2.00 g, 3.79 mmol), pentiptycene aminophenol (2.10 g, 4.54 mmol) and *p*-toluenesulfonic acid (20 mg) in toluene (250 mL) was refluxed with Dean-stark trap for 3 days, the solvent was partially evaporated under reduced pressure until the formation of a yellow solid, and the remaining solution was diluted in methanol (300 mL). The yellow solid was isolated by filtration and recrystallized from hot methanol, washed three times by 20 mL hot methanol and dried under high vacuum. (2.93 g, 79.5% yield)

**$^1H$  NMR** (500 MHz, 298 K,  $CDCl_3$ , 7.26 ppm):  $\delta$  = 7.49-7.45(m, 4H, aryl-*H*), 7.38-7.32(m, 11H, aryl-*H*), 7.28-7.21(m, 7H, aryl-*H*), 7.18-7.14(m, 6H, aryl-*H*), 6.96-6.90(m, 10H, aryl-*H*), 5.65 (s, 2H,  $CHAr_3$ ), 5.47(s, 2H,  $CHPh_2$ ), 4.95(s, 2H,  $CHAr_3$ ), 4.65(s, 1H, OH), 1.72 (s, 3H,  $N=C-Me$ ), 1.18 (s, 3H,  $N=C-Me$ )ppm.

**Elemental analysis:** Anal. Calcd for  $C_{70}H_{51}ClN_2O$ : C, 86.53; H, 5.29; N, 2.88. Found: C, 86.39; H, 5.43; N, 2.84.

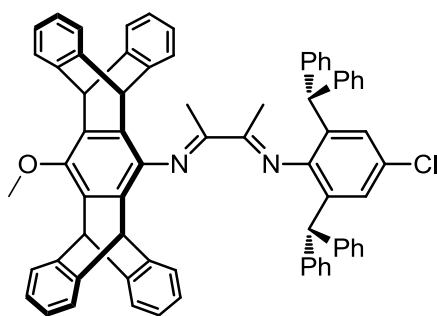

**Preparation of Ligand L3:** To the solution of 2-(2,6-dibenzhydryl-4-chlorophenylimino)-3-pentiptycene aminophenol butane (2.93 g, 2.97 mmol) in DMF (200 mL) at 50 °C was added  $K_2CO_3$  (4.61 g, 35.67 mmol). The mixture was stirred for 1 min and MeI (1.69 g, 11.88 mmol) was added. The reaction mixture was stirred overnight at 50 °C. The yellow suspension was cooled to room temperature and poured into 300 mL of water. The yellow precipitate was collected by filtration, washed with water, methanol and diethyl ether. After drying in vacuo at 70 °C, the product was obtained as a yellow powder (2.09 g, 70.2% yield).

**$^1H$  NMR** (500 MHz, 298 K,  $CDCl_3$ , 7.26 ppm):  $\delta$  = 7.48-7.45(m, 4H, aryl-*H*), 7.38-7.33(m, 10H, aryl-*H*), 7.28-7.21(m, 8H, aryl-*H*), 7.18-7.14(m, 6H, aryl-*H*), 6.96-6.91(m, 10H, aryl-*H*), 5.71(s, 2H,  $CHAr_3$ ), 5.46(s, 2H,  $CHPh_2$ ), 4.95(s, 2H,  $CHAr_3$ ), 3.90(s, 3H,  $OCH_3$ ), 1.74 (s, 3H,  $N=C-Me$ ), 1.16 (s, 3H,  $N=C-Me$ )ppm.

**$^{13}C\{^1H\}$  NMR** (125 MHz, 298 K,  $CDCl_3$ , 77.16 ppm):  $\delta$  = 170.90 ( $N=C-Me$ ), 170.08 ( $N=C-Me$ ), 147.01, 146.69, 145.71, 145.36, 145.24, 145.20, 142.96, 142.09, 137.95, 135.68, 133.81, 131.53, 129.92, 129.58, 129.09, 128.68, 128.61, 127.09, 126.86, 125.41, 125.38, 125.25, 125.21, 123.79, 123.71, 123.69, 123.39, 63.22( $OCH_3$ ), 52.52, 49.26, 48.32, 17.32( $N=C-Me$ ), 16.86( $N=C-Me$ )ppm.

**Elemental analysis:** Anal. Calcd for  $C_{71}H_{53}ClN_2O$ : C, 86.52; H, 5.42; N, 2.84. Found: C, 86.68; H, 5.54; N, 2.79.

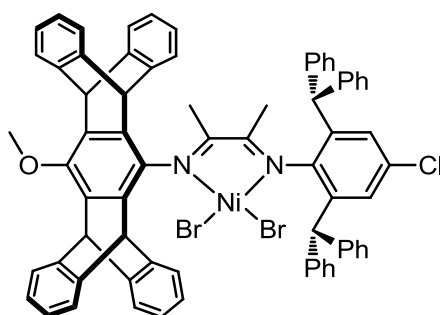

**Preparation of Cat3:** A mixture of **L3** (220 mg, 0.223 mmol) and (DME) $NiBr_2$  (68.9 mg, 0.223 mmol) (DME = 1,2-dimethoxyethane) were stirred in 25 mL of dichloromethane overnight at room temperature. The solvent was evaporated under reduced pressure, the desired compound can be isolated from repeated recrystallized from *n*-hexane and dichloromethane. The pure compound was obtained as an orange solid. (241 mg, 89.8% yield).

MALDI-TOF-MS (*m/z*): 1042.3 [ $M-2Br$ ] $^+$ , 1077.2 [ $M-2Br+Cl$ ] $^+$ , 1121.2 [ $M-Br$ ] $^+$ .

**Elemental analysis:** Anal. Calcd for  $C_{71}H_{53}Br_2ClN_2NiO$ : C, 70.82; H, 4.44; N, 2.33. Found: C, 70.67; H, 4.36; N, 2.38.

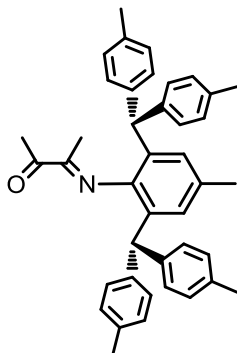

A solution of 2,6-bis(bis(4-methylphenyl)methyl)-4-methylaniline (9.91 g, 20 mmol), 2,3-butanedione (8.61 g, 100 mmol) and *p*-toluenesulfonic acid (20 mg) in toluene (200 mL) was stirred at 80 °C for 24 h, the solvent was partially evaporated under reduced pressure until the formation of a yellow solid, and the remaining solution was diluted in methanol (300 mL). The yellow solid was isolated by filtration, washed three times by 20 mL methanol and dried under high vacuum. (7.92 g, 70.2% yield)

**$^1H$  NMR** (500 MHz, 298 K,  $CDCl_3$ , 7.26 ppm):  $\delta$  = 7.05-7.00(m, 8H, aryl-*H*), 6.90-6.96(m, 8H, aryl-*H*), 6.65 (s, 2H, aryl-*H*), 5.00 (s, 2H,  $CHPh_2$ ), 2.35 (s, 3H,  $O=C-Me$ ), 2.31{s, 6H,  $CH(Ph-Me)_2$ }, 2.27{s, 6H,  $CH(Ph-Me)_2$ }, 2.16 (s, 3H, aryl-*Me*), 0.65 (s, 3H,  $N=C-Me$ )ppm.

**Elemental analysis:** Anal. Calcd for  $C_{41}H_{41}NO$ : C, 87.35; H, 7.33; N, 2.48. Found: C, 87.31; H, 7.37; N, 2.44.

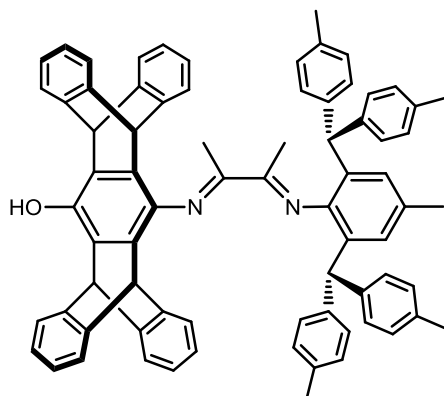

A solution of (2,6-bis(bis(4-methylphenyl)methyl)-4-methylphenylimino) butanone (2.00g, 3.55 mmol), pentiptycene aminophenol (2.18 g, 4.26 mmol) and *p*-toluenesulfonic acid (20 mg) in toluene (250 mL) was refluxed with Dean-stark trap for 3 days, the solvent was partially evaporated under reduced pressure until the formation of a yellow solid, and the remaining solution was diluted in methanol (300 mL). The yellow solid was isolated by filtration and recrystallized from hot methanol, washed three times by 20 mL hot methanol and dried under high vacuum. (2.95 g, 82.5% yield)

**$^1H$  NMR** (500 MHz, 298 K,  $CDCl_3$ , 7.26 ppm):  $\delta$  = 7.34-7.33(m, 4H, aryl-*H*), 7.24-7.17(m, 6H, aryl-*H*), 7.17-7.11(m, 10H, aryl-*H*), 7.05-7.03(m, 4H, aryl-*H*), 6.95-6.89(m, 8H, aryl-*H*), 6.73(s, 2H, aryl-*H*), 5.65(s, 2H,  $CHAr_3$ ), 5.39(s, 2H,  $CHPh_2$ ),

4.98(s, 2H,  $CHAr_3$ ), 4.64(s, 1H, OH), 2.39{s, 6H,  $CH(Ph-Me)_2$ }, 2.33{s, 6H,  $CH(Ph-Me)_2$ }, 2.23(s, 3H, aryl- $Me$ ), 1.75 (s, 3H,  $N=C-Me$ ), 1.19 (s, 3H,  $N=C-Me$ )ppm.

**Elemental analysis:** Anal. Calcd for  $C_{75}H_{62}N_2O$ : C, 89.43; H, 6.20; N, 2.78. Found: C, 89.28; H, 6.15; N, 2.81.

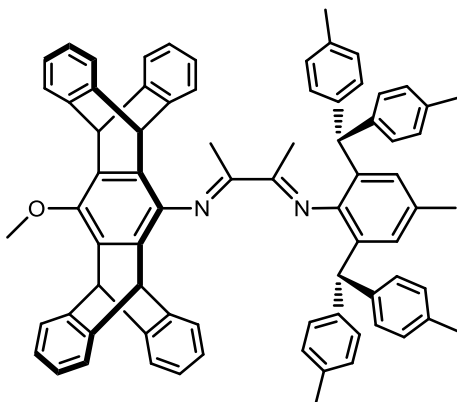

**Preparation of Ligand L4:** To the solution of 2-(2,6-bis(bis(4-methylphenyl)methyl)-4-methylphenylimino)-3-pentiptycene aminophenol butane (2.95 g, 2.93 mmol) in DMF (200 mL) at 50 °C was added  $K_2CO_3$  (4.61 g, 35.14 mmol). The mixture was stirred for 1 min and MeI (1.64g, 11.72 mmol) was added. The reaction mixture was stirred overnight at 50 °C. The yellow suspension was cooled to room temperature and poured into 300 mL of water. The yellow precipitate was collected by filtration, washed with water, methanol and diethyl ether. After drying in vacuo at 70 °C, the product was obtained as a yellow powder (2.36 g, 78.8% yield).

**$^1H$  NMR** (500 MHz, 298 K,  $CDCl_3$ , 7.26 ppm):  $\delta$  = 7.35-7.34(m, 4H, aryl- $H$ ), 7.24-7.21(m, 6H, aryl- $H$ ), 7.18-7.11(m, 10H, aryl- $H$ ), 7.05-7.03(m, 4H, aryl- $H$ ), 6.95-6.90(m, 8H, aryl- $H$ ), 6.73(s, 2H, aryl- $H$ ), 5.71(s, 2H,  $CHAr_3$ ), 5.38(s, 2H,  $CHPh_2$ ), 4.98(s, 2H,  $CHAr_3$ ), 3.90(s, 3H,  $OCH_3$ ), 2.39{s, 6H,  $CH(Ph-Me)_2$ }, 2.33{s, 6H,  $CH(Ph-Me)_2$ }, 2.23(s, 3H, aryl- $Me$ ), 1.77 (s, 3H,  $N=C-Me$ ), 1.16 (s, 3H,  $N=C-Me$ )ppm.

**$^{13}C\{^1H\}$  NMR** (125 MHz, 298 K,  $CDCl_3$ , 77.16 ppm):  $\delta$  = 170.56 ( $N=C-Me$ ), 170.11 ( $N=C-Me$ ), 146.89, 145.74, 145.71, 145.44, 145.36, 145.23, 141.23, 140.21, 138.20, 136.08, 135.82, 135.60, 132.04, 131.77, 131.58, 129.87, 129.51, 129.45, 129.11, 128.94, 125.35, 125.33, 125.27, 125.14, 123.80, 123.72, 123.66, 123.51, 63.23( $OCH_3$ ), 51.70, 49.32, 48.34, 21.54(aryl- $Me$ ), 21.28{ $CH(Ph-Me)_2$ }, 21.20{ $CH(Ph-Me)_2$ }, 17.45( $N=C-Me$ ), 16.58( $N=C-Me$ )ppm.

**Elemental analysis:** Anal. Calcd for  $C_{76}H_{64}N_2O$ : C, 89.37; H, 6.32; N, 2.74. Found: C, 89.21; H, 6.35; N, 2.77.

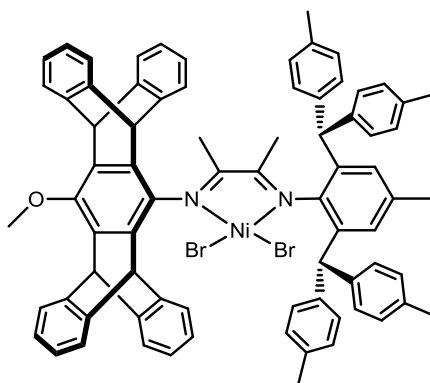

**Preparation of Cat4:** A mixture of **L4** (220 mg, 0.215 mmol) and (DME)NiBr<sub>2</sub> (66.5 mg, 0.215 mmol) (DME = 1,2-dimethoxyethane) were stirred in 25 mL of dichloromethane overnight at room temperature. The solvent was evaporated under reduced pressure, the desired compound can be isolated from repeated recrystallized from n-hexane and dichloromethane. The pure compound was obtained as an orange solid. (220 mg, 82.5% yield).

MALDI-TOF-MS (*m/z*): 1078.4 [M-2Br]<sup>+</sup>, 1113.4 [M-2Br+Cl]<sup>+</sup>, 1157.3 [M-Br]<sup>+</sup>.

**Elemental analysis:** Anal. Calcd for C<sub>76</sub>H<sub>64</sub>Br<sub>2</sub>N<sub>2</sub>NiO: C, 73.62; H, 5.20; N, 2.26. Found: C, 73.78; H, 5.14; N, 2.37.

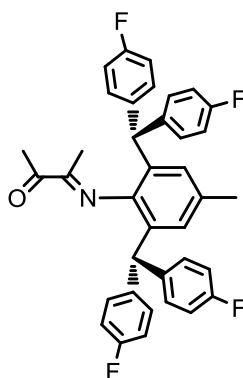

A solution of 2,6-bis(bis(4-fluorophenyl)methyl)-4-methylaniline (10.23 g, 20 mmol), 2,3-butanedione (8.61 g, 100 mmol) and *p*-toluenesulfonic acid (20 mg) in toluene (200 mL) was stirred at 80 °C for 24 h, the solvent was partially evaporated under reduced pressure until the formation of a yellow solid, and the remaining solution was diluted in methanol (300 mL). The yellow solid was isolated by filtration, washed three times by 20 mL methanol and dried under high vacuum. (7.98 g, 68.8% yield)

**<sup>1</sup>H NMR** (500 MHz, 298 K, CDCl<sub>3</sub>, 7.26 ppm): δ = 6.97-6.91(m, 16H, aryl-*H*), 6.58 (s, 2H, aryl-*H*), 5.04 (s, 2H, CHPh<sub>2</sub>), 2.29 (s, 3H, O=C-*Me*), 2.17 (s, 3H, aryl-*Me*), 0.83 (s, 3H, N=C-*Me*)ppm.

**Elemental analysis:** Anal. Calcd for C<sub>37</sub>H<sub>29</sub>F<sub>4</sub>NO: C, 76.67; H, 5.04; N, 2.42. Found: C, 76.64; H, 5.09; N, 2.39.

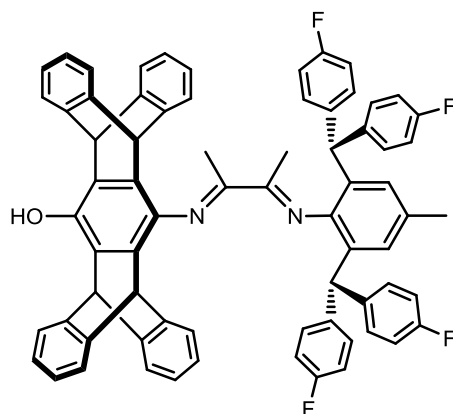

A solution of (2,6-bis(bis(4-fluorophenyl)methyl)-4-methylphenylimino) butanone (2.00 g, 3.45 mmol), pentiptycene aminophenol (1.91 g, 4.14 mmol) and p-toluenesulfonic acid (20 mg) in toluene (250 mL) was refluxed with Dean-stark trap for 3 days, the solvent was partially evaporated under reduced pressure until the formation of a yellow solid, and the remaining solution was diluted in methanol (300 mL). The yellow solid was isolated by filtration and recrystallized from hot methanol, washed three times by 20 mL hot methanol and dried under high vacuum. (2.67 g, 75.5% yield)  $^1\text{H}$  NMR (500 MHz, 298 K,  $\text{CDCl}_3$ , 7.26 ppm):  $\delta$  = 7.35-7.33(m, 4H, aryl-*H*), 7.23-7.20(m, 6H, aryl-*H*), 7.17-7.13(m, 4H, aryl-*H*), 7.10-7.07(m, 6H, aryl-*H*), 7.03-7.00(m, 4H, aryl-*H*), 6.96-6.90(m, 8H, aryl-*H*), 6.67(s, 2H, aryl-*H*), 5.66(s, 2H,  $\text{CHAr}_3$ ), 5.42(s, 2H,  $\text{CHPh}_2$ ), 4.90(s, 2H,  $\text{CHAr}_3$ ), 4.66(s, 1H, OH), 2.23(s, 3H, aryl-*Me*), 1.70 (s, 3H,  $\text{N}=\text{C}-\text{Me}$ ), 1.33 (s, 3H,  $\text{N}=\text{C}-\text{Me}$ )ppm.

**Elemental analysis:** Anal. Calcd for  $\text{C}_{71}\text{H}_{50}\text{F}_4\text{N}_2\text{O}$ : C, 83.35; H, 4.93; N, 2.74. Found: C, 83.21; H, 4.86; N, 2.66.

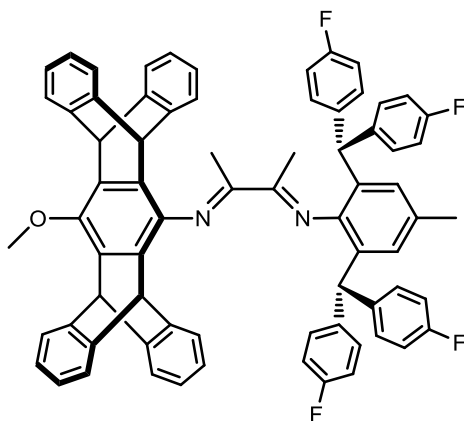

**Preparation of Ligand L5:** To the solution of 2-(2,6-bis(bis(4-fluorophenyl)methyl)-4-methylphenylimino)-3- pentiptycene aminophenol butane (2.67 g, 2.61 mmol) in DMF (200 mL) at 50 °C was added  $\text{K}_2\text{CO}_3$  (4.61 g, 31.32 mmol). The mixture was stirred for 1 min and MeI (1.64 g, 10.44 mmol) was added. The reaction mixture was stirred overnight at 50 °C. The yellow suspension was cooled to room temperature and poured into 300 mL of water. The yellow precipitate was collected by filtration, washed with water, methanol and diethyl ether. After drying in vacuo at 70 °C, the product was obtained as a yellow powder (2.01 g, 74.1% yield).

**<sup>1</sup>H NMR** (500 MHz, 298 K, CDCl<sub>3</sub>, 7.26 ppm): δ = 7.36-7.34(m, 4H, aryl-*H*), 7.23-7.19(m, 6H, aryl-*H*), 7.17-7.13(m, 4H, aryl-*H*), 7.11-7.07(m, 6H, aryl-*H*), 7.04-7.00(m, 4H, aryl-*H*), 6.96-6.91(m, 8H, aryl-*H*), 6.67(s, 2H, aryl-*H*), 5.71(s, 2H, CHAr<sub>3</sub>), 5.42(s, 2H, CHPh<sub>2</sub>), 4.90(s, 2H, CHAr<sub>3</sub>), 3.91(s, 3H, OCH<sub>3</sub>), 2.23(s, 3H, aryl-*Me*), 1.72 (s, 3H, N=C-*Me*), 1.31 (s, 3H, N=C-*Me*)ppm.

**<sup>13</sup>C{<sup>1</sup>H} NMR** (125 MHz, 298 K, CDCl<sub>3</sub>, 77.16 ppm): δ = 170.34(N=C-*Me*), 170.21 (N=C-*Me*), 162.79, 162.63, 160.83, 160.69, 147.07, 145.74, 145.53, 145.20, 145.11, 139.28, 139.26, 138.55, 138.53, 137.86, 135.71, 132.75, 131.54, 131.44, 131.32, 131.26, 130.97, 130.91, 129.19, 125.45, 125.33, 125.23, 123.88, 123.73, 123.69, 123.19, 115.95, 115.78, 115.47, 115.31, 63.23(OCH<sub>3</sub>), 50.99, 49.42, 48.32, 21.49(aryl-*Me*), 17.25(N=C-*Me*), 16.95(N=C-*Me*) ppm.

**Elemental analysis:** Anal. Calcd for C<sub>72</sub>H<sub>52</sub>F<sub>4</sub>N<sub>2</sub>O: C, 83.38; H, 5.05; N, 2.70. Found: C, 83.53; H, 5.17; N, 2.79.

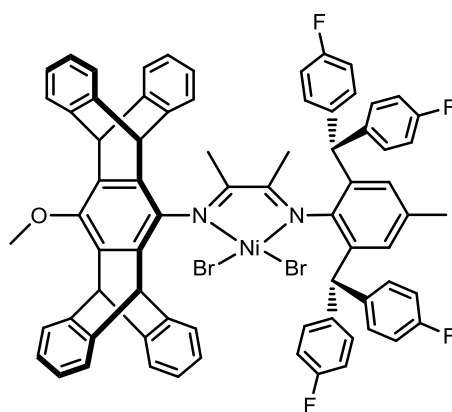

**Preparation of Cat5:** A mixture of **L5** (220 mg, 0.212 mmol) and (DME)NiBr<sub>2</sub> (65.5 mg, 0.212 mmol) (DME = 1,2-dimethoxyethane) were stirred in 25 mL of dichloromethane overnight at room temperature. The solvent was evaporated under reduced pressure, the desired compound can be isolated from repeated recrystallized from n-hexane and dichloromethane. The pure compound was obtained as an orange solid. (212 mg, 79.6% yield).

MALDI-TOF-MS (m/z): 1094.3 [M-2Br]<sup>+</sup>, 1129.3 [M-2Br+Cl]<sup>+</sup>, 1173.2 [M-Br]<sup>+</sup>.

**Elemental analysis:** Anal. Calcd for C<sub>72</sub>H<sub>52</sub>Br<sub>2</sub>F<sub>4</sub>N<sub>2</sub>NiO: C, 68.87; H, 4.17; N, 2.23. Found: C, 68.71; H, 4.10; N, 2.35.

### 3 General procedures for the polymerizations

#### **A general procedure for the homopolymerization of ethylene using Ni catalyst**

In a typical experiment, a 350 mL glass pressure reactor connected with a high pressure gas line was firstly dried at 90 °C under vacuum for at least 1 h. The reactor was then adjusted to the desired polymerization temperature. 98 mL of toluene and MAO was added to the reactor under N<sub>2</sub> atmosphere, then the desired amount of Ni catalyst in 2 mL of CH<sub>2</sub>Cl<sub>2</sub> was injected into the polymerization system via syringe. With a rapid stirring, the reactor was pressurized and maintained at 8 atm of ethylene. After 5 min, the pressure reactor was vented and the polymerization was quenched via the addition of 100 mL acidic MeOH (5% HCl in MeOH) and the polymer was filtered, then dried at 60 °C under vacuum oven to constant weight.

The polyethylene precipitates during polymerization because it was insoluble in toluene at low temperature (30 °C). After 5 min, the pressure reactor was vented and the polymerization was quenched via the addition of 100 mL acidic MeOH (5% HCl in MeOH) and the polymer was filtered, then dried at 60 °C under vacuum oven to constant weight.

#### **A general procedure for the copolymerization of polar monomer with ethylene using Ni catalyst**

In a typical experiment, a 150 mL glass pressure reactor connected with a high pressure gas line was firstly dried at 90 °C under vacuum for at least 1 h. The reactor was then adjusted to the desired polymerization temperature. 20 mL of CH<sub>2</sub>Cl<sub>2</sub> with Et<sub>2</sub>AlCl and polar monomer were added to the reactor under N<sub>2</sub> atmosphere, then the desired amount of Ni catalyst in 2 mL of CH<sub>2</sub>Cl<sub>2</sub> was injected into the polymerization system via syringe subsequently. With a rapid stirring, the reactor was pressurized and maintained at desired ethylene pressure. After 1 h, the pressure reactor was vented and the polymerization was quenched via the addition of 20 mL acidic MeOH (5% HCl in MeOH) and the polymer was filtered, washed three times with methanol to remove residual monomer, then dried at 60 °C under vacuum oven to constant weight.

## 4 Spectra Data

### 4.1 $^1\text{H}$ , $^{13}\text{C}$ NMR of Ligand

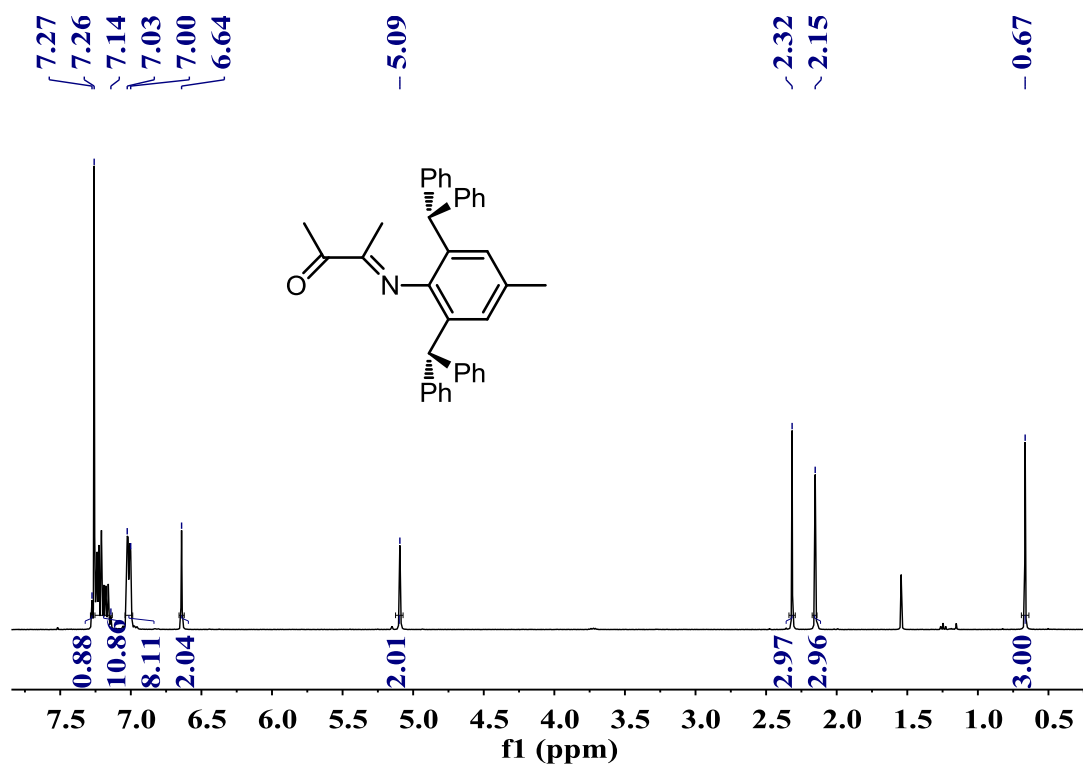

**Figure S1.**  $^1\text{H}$  NMR spectrum of (2,6-dibenzhydryl-4-methylphenylimino) butanone in  $\text{CDCl}_3$ .

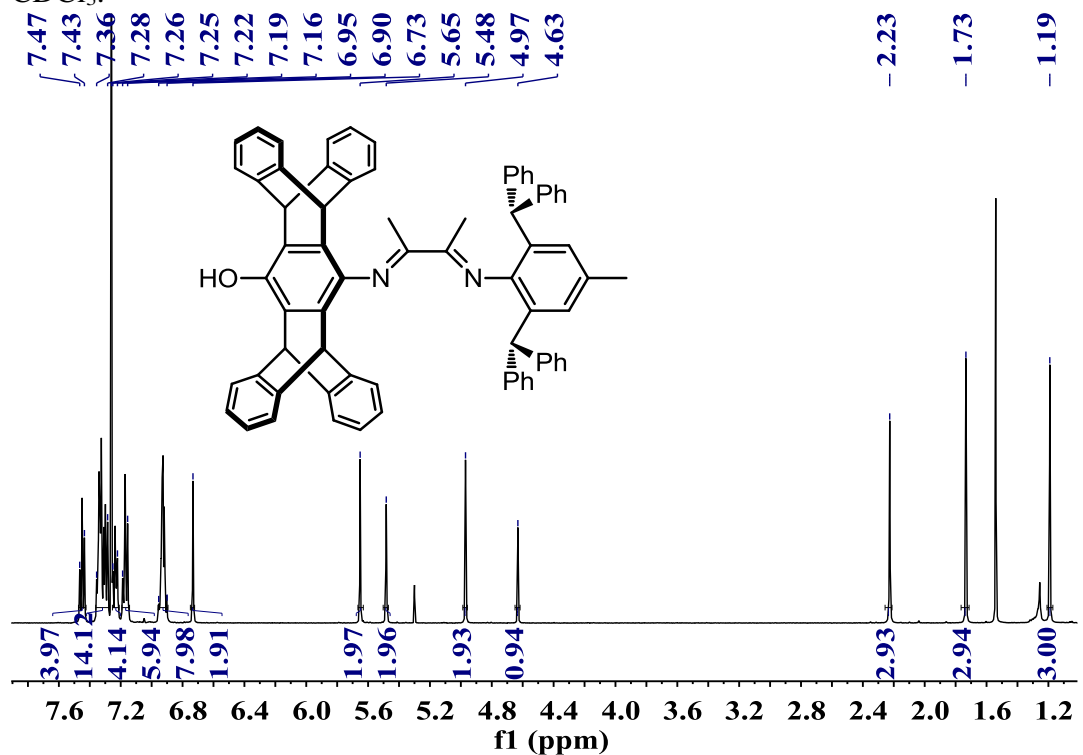

**Figure S2.**  $^1\text{H}$  NMR spectrum of 2-(2,6-Dibenzhydryl-4-methylphenylimino)-3-pentiptycene aminophenol butane in  $\text{CDCl}_3$ .

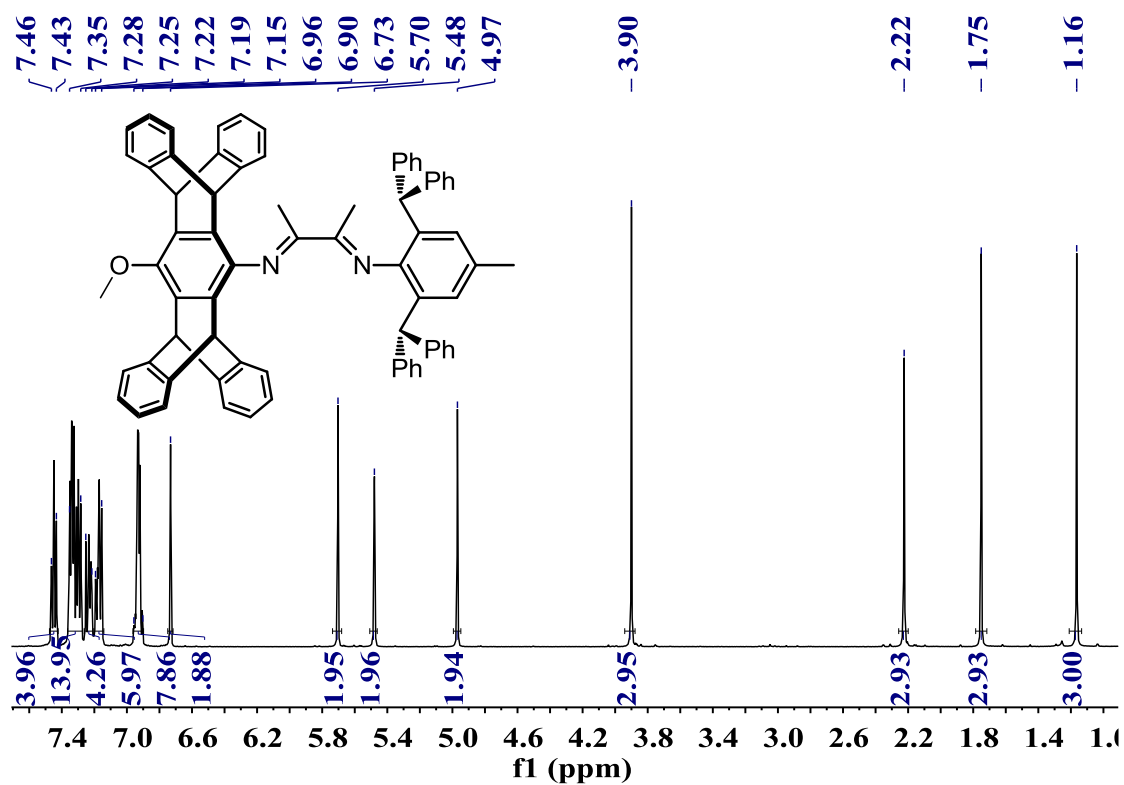

**Figure S3.** <sup>1</sup>H NMR spectrum of **L1** in CDCl<sub>3</sub>

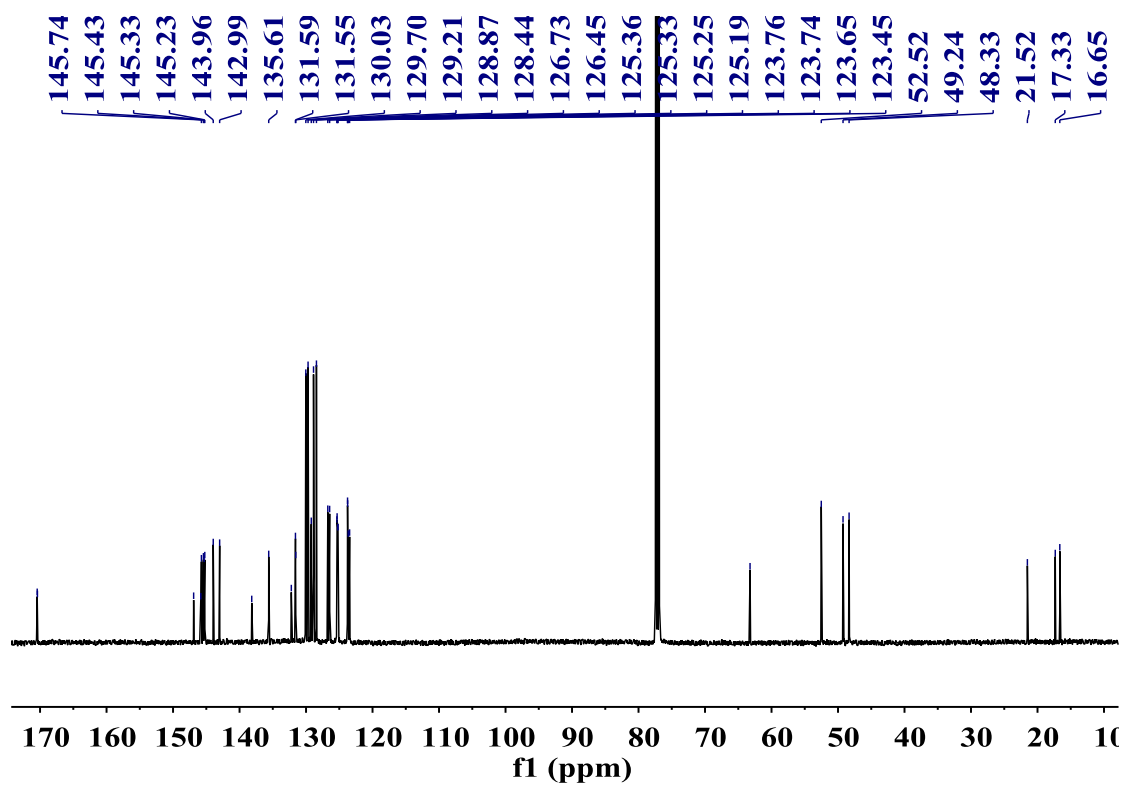

**Figure S4.** <sup>13</sup>C NMR spectrum of **L1** in CDCl<sub>3</sub>

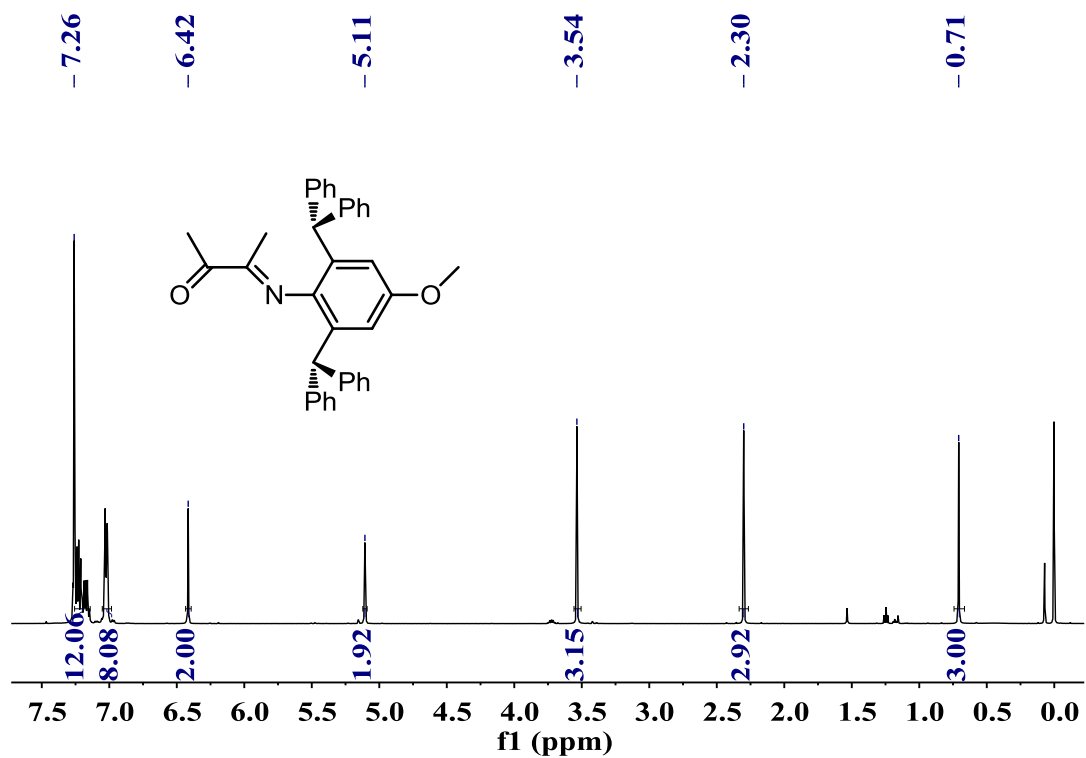

**Figure S5.**  $^1\text{H}$  NMR spectrum of (2,6-dibenzhydryl-4-methoxyphenylimino) butanone in  $\text{CDCl}_3$

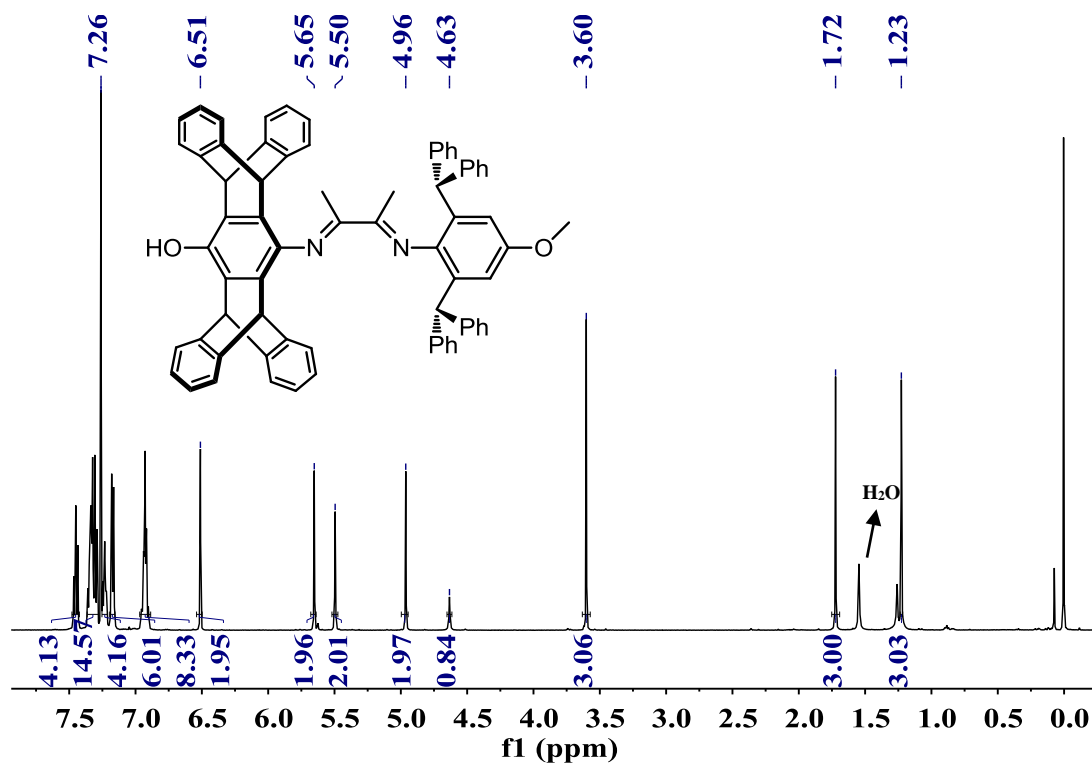

**Figure S6.**  $^1\text{H}$  NMR spectrum of 2-(2,6-Dibenzhydryl-4-methylphenylimino)-3-pentiptcene aminophenol butane in  $\text{CDCl}_3$

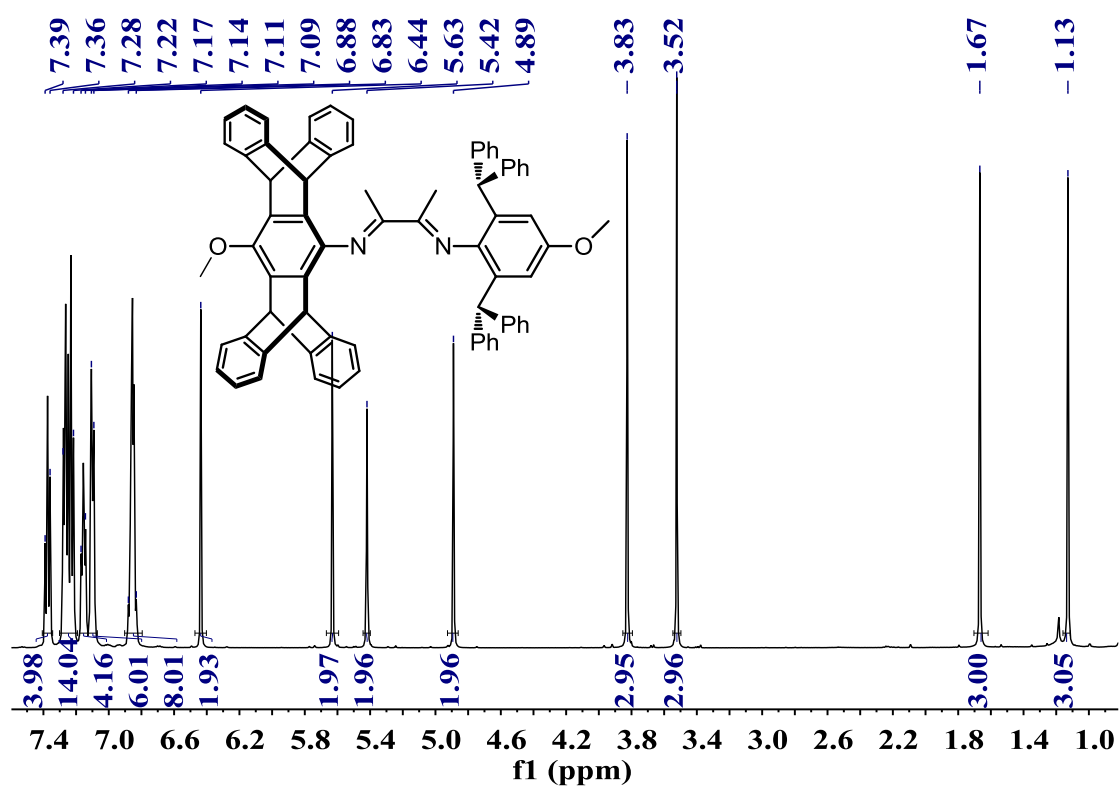

**Figure S7.** <sup>1</sup>H NMR spectrum of **L2** in CDCl<sub>3</sub>

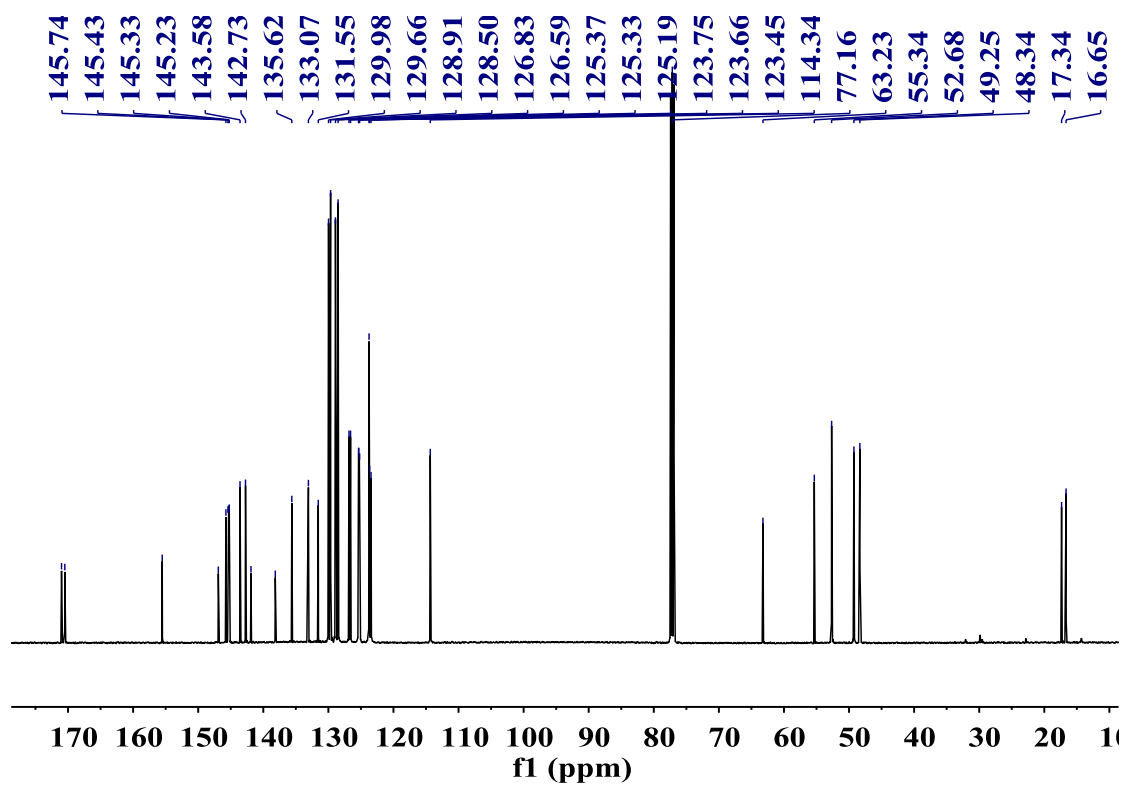

**Figure S8.** <sup>13</sup>C NMR spectrum of **L2** in CDCl<sub>3</sub>

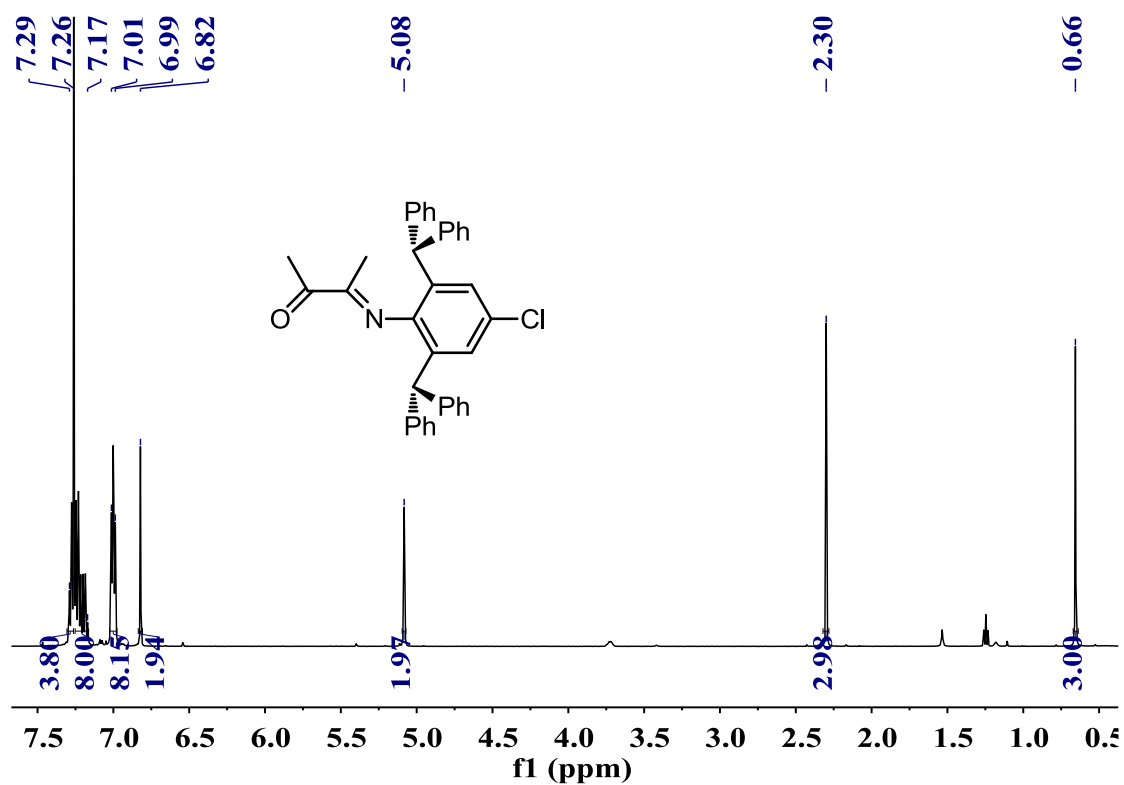

**Figure S9.**  $^1\text{H}$  NMR spectrum of (2,6-dibenzhydryl-4-chlorophenylimino) butanone in  $\text{CDCl}_3$

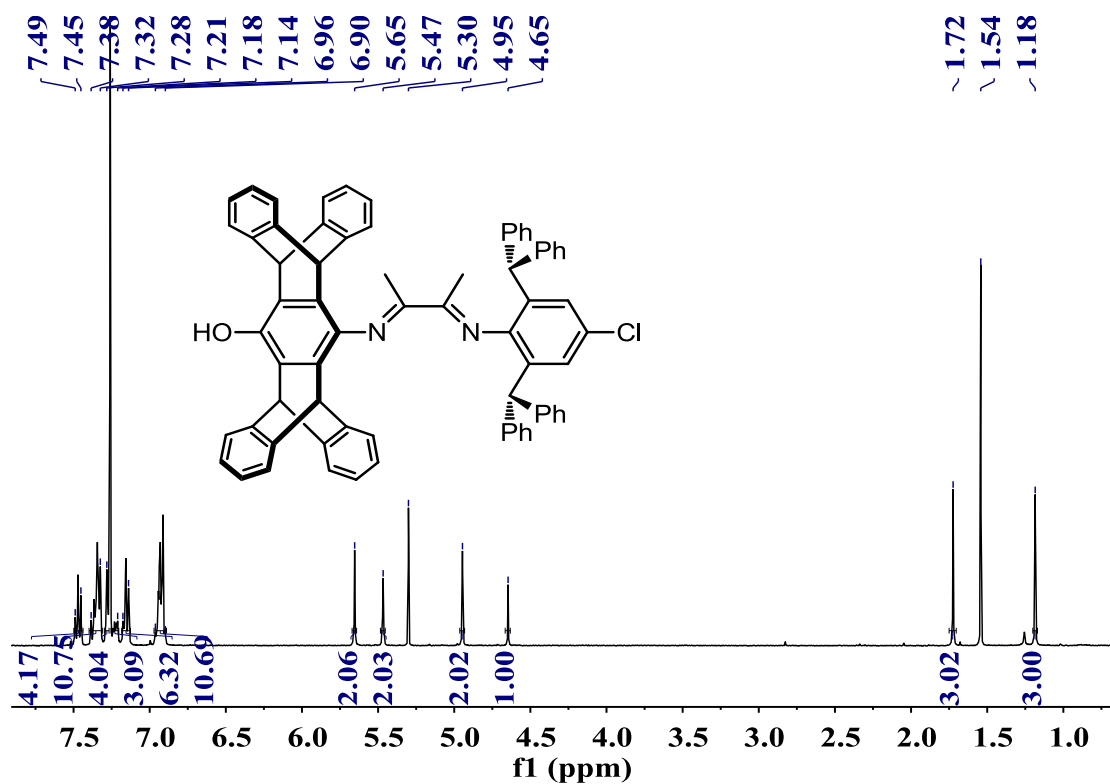

**Figure S10.**  $^1\text{H}$  NMR spectrum of 2-(2,6-Dibenzhydryl-4-chlorophenylimino)-3-pentiptycene aminophenol butane in  $\text{CDCl}_3$

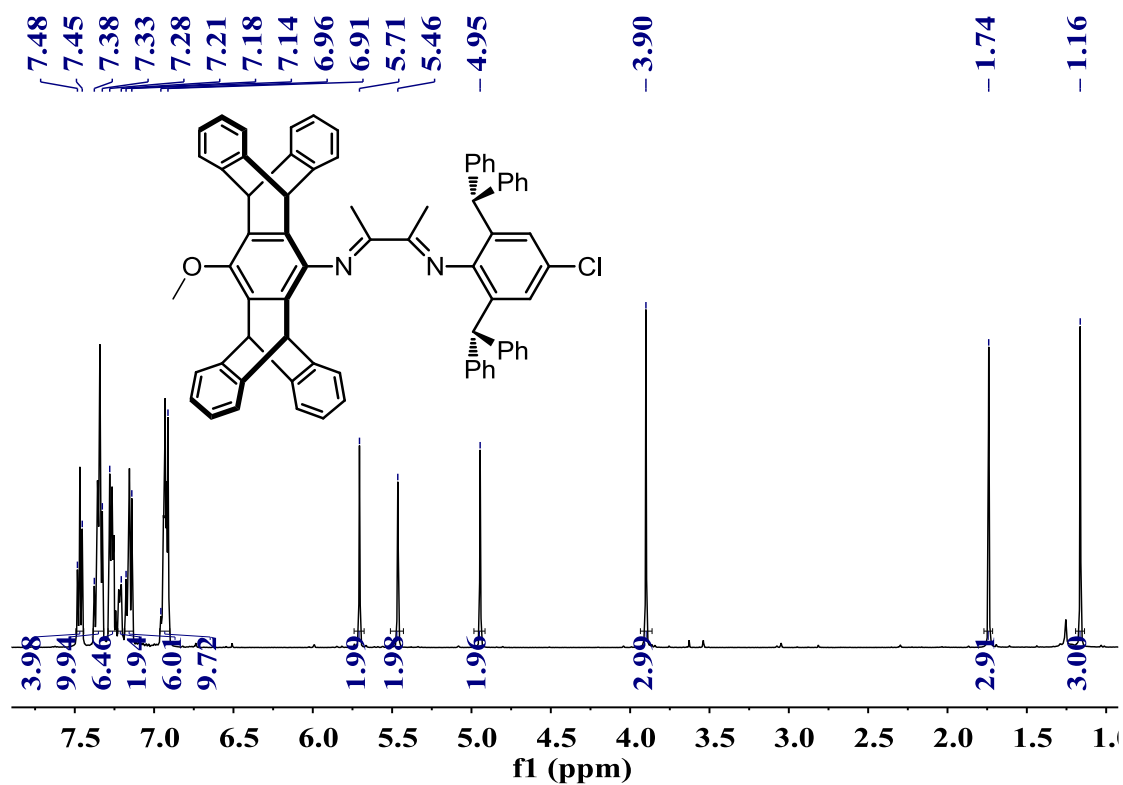

**Figure S11.** <sup>1</sup>H NMR spectrum of **L3** in CDCl<sub>3</sub>

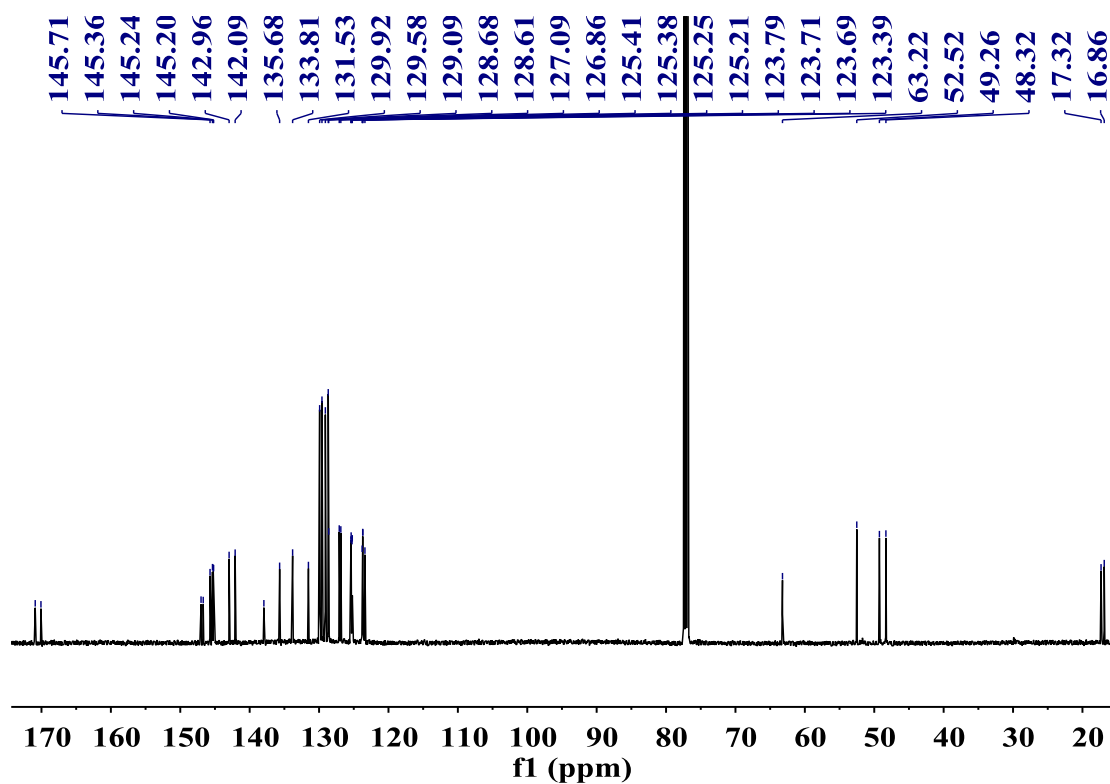

**Figure S12.** <sup>13</sup>C NMR spectrum of **L3** in CDCl<sub>3</sub>



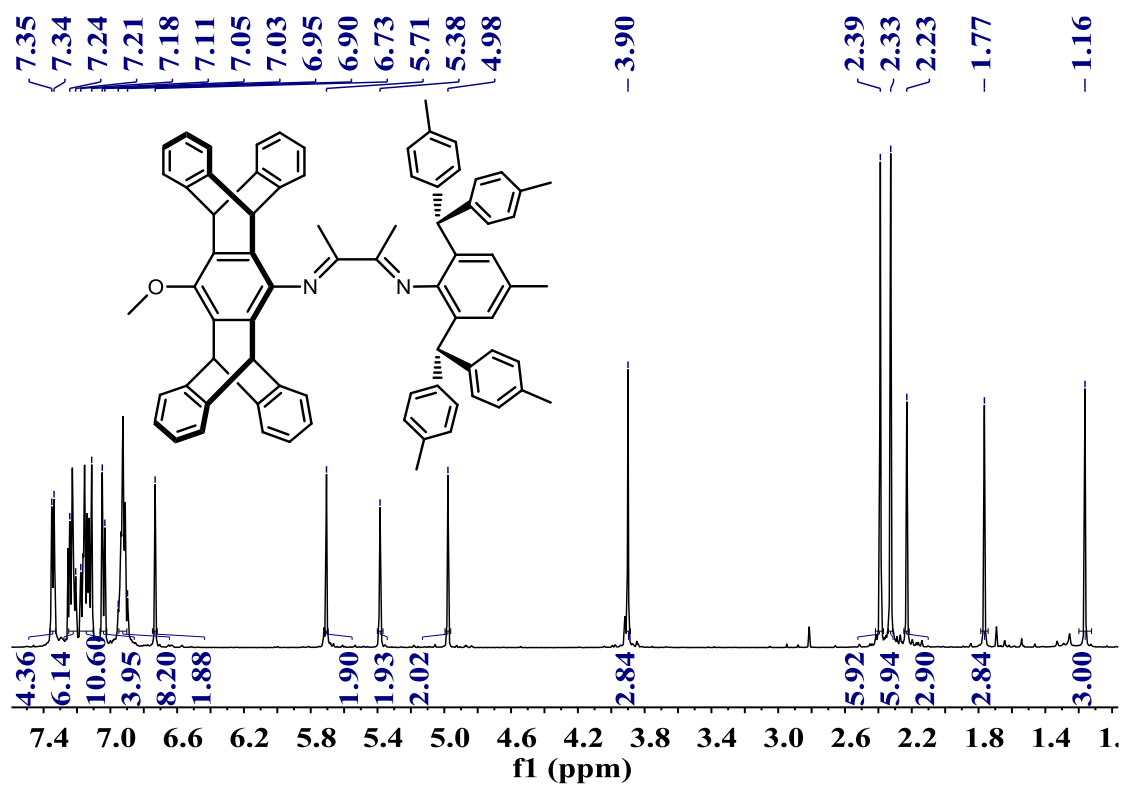

**Figure S15.** <sup>1</sup>H NMR spectrum of **L4** in CDCl<sub>3</sub>

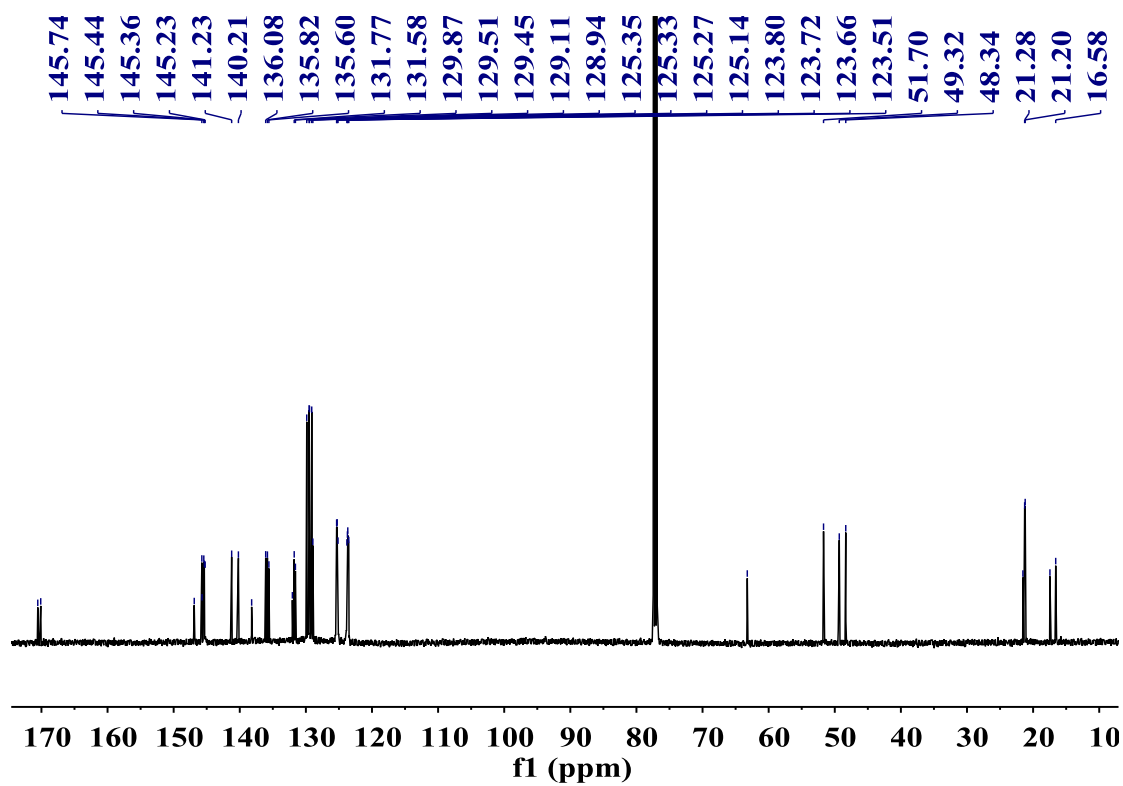

**Figure S16.** <sup>13</sup>C NMR spectrum of **L4** in CDCl<sub>3</sub>

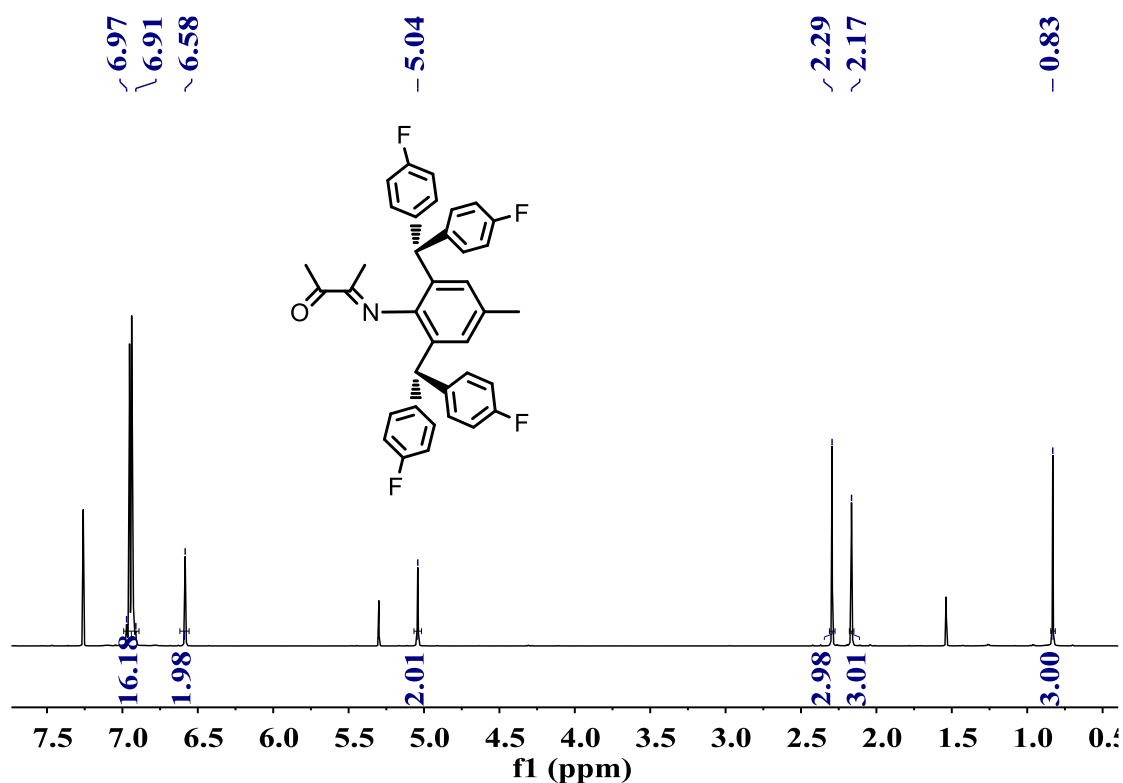

**Figure S17.** <sup>1</sup>H NMR spectrum of (2,6-bis(bis(4-fluorophenyl)methyl)-4-methylphenylimino) butanone in CDCl<sub>3</sub>

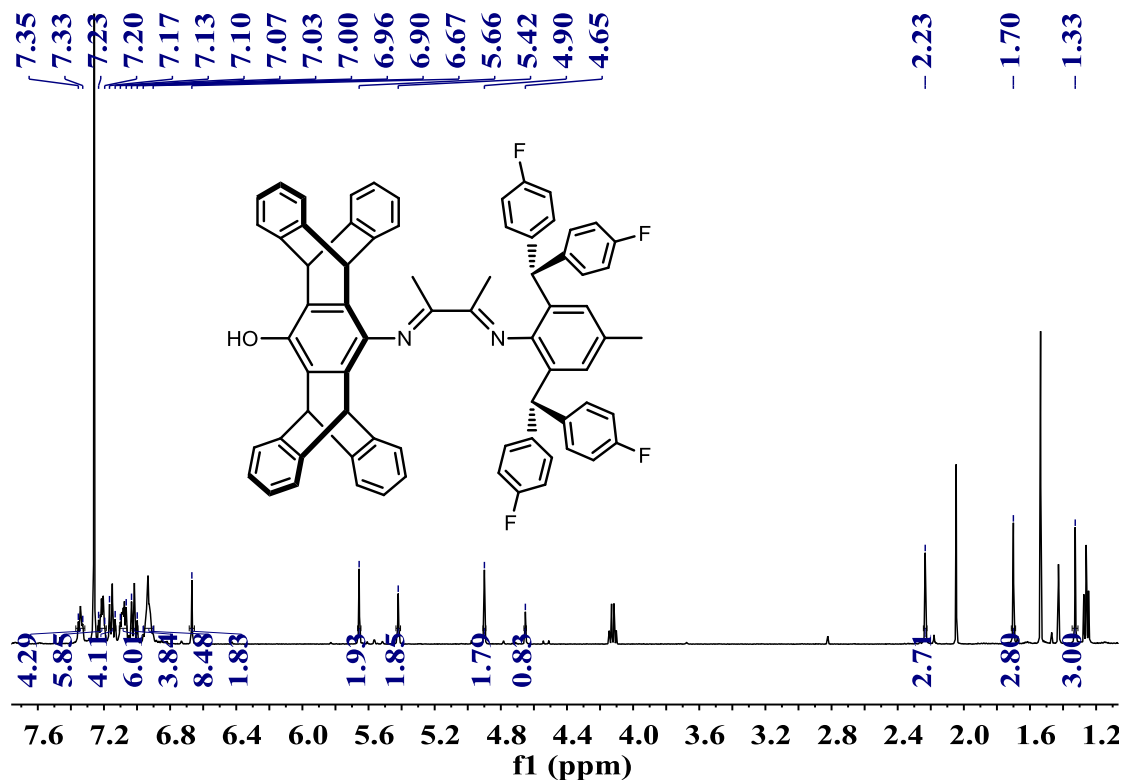

**Figure S18.** <sup>1</sup>H NMR spectrum of 2-(2,6-bis(bis(4-fluorophenyl)methyl)-4-methylphenylimino)-3-pentiptycene aminophenol butane in CDCl<sub>3</sub>

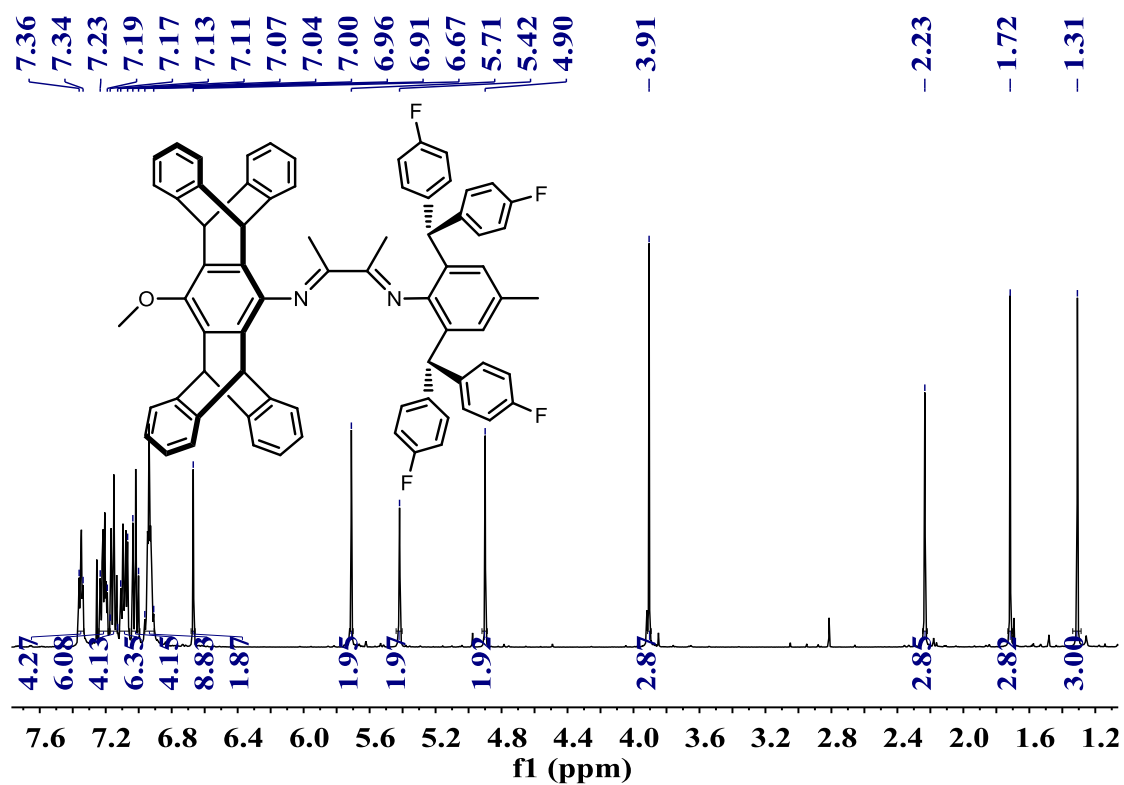

**Figure S19.** <sup>1</sup>H NMR spectrum of **L5** in CDCl<sub>3</sub>

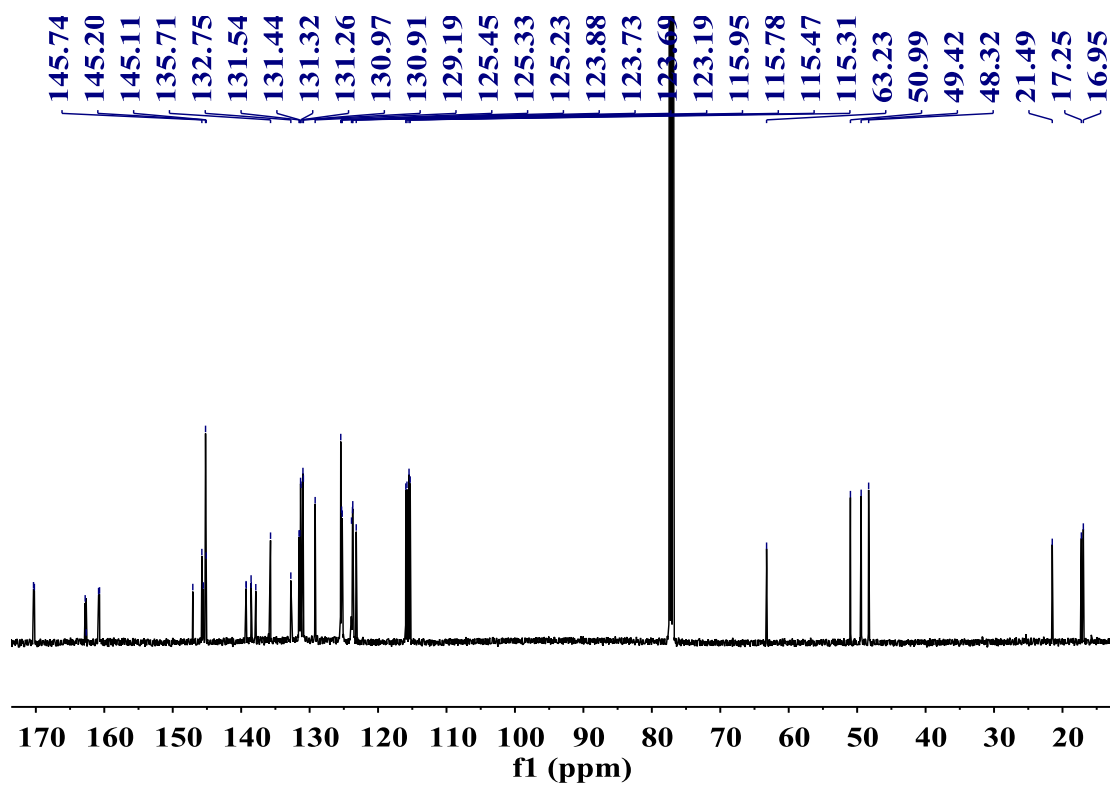

**Figure S20.** <sup>13</sup>C NMR spectrum of **L5** in CDCl<sub>3</sub>

## 4.2 $^1\text{H}$ , $^{13}\text{C}$ , $^1\text{H}$ - $^1\text{H}$ COSY NMR of Complexes

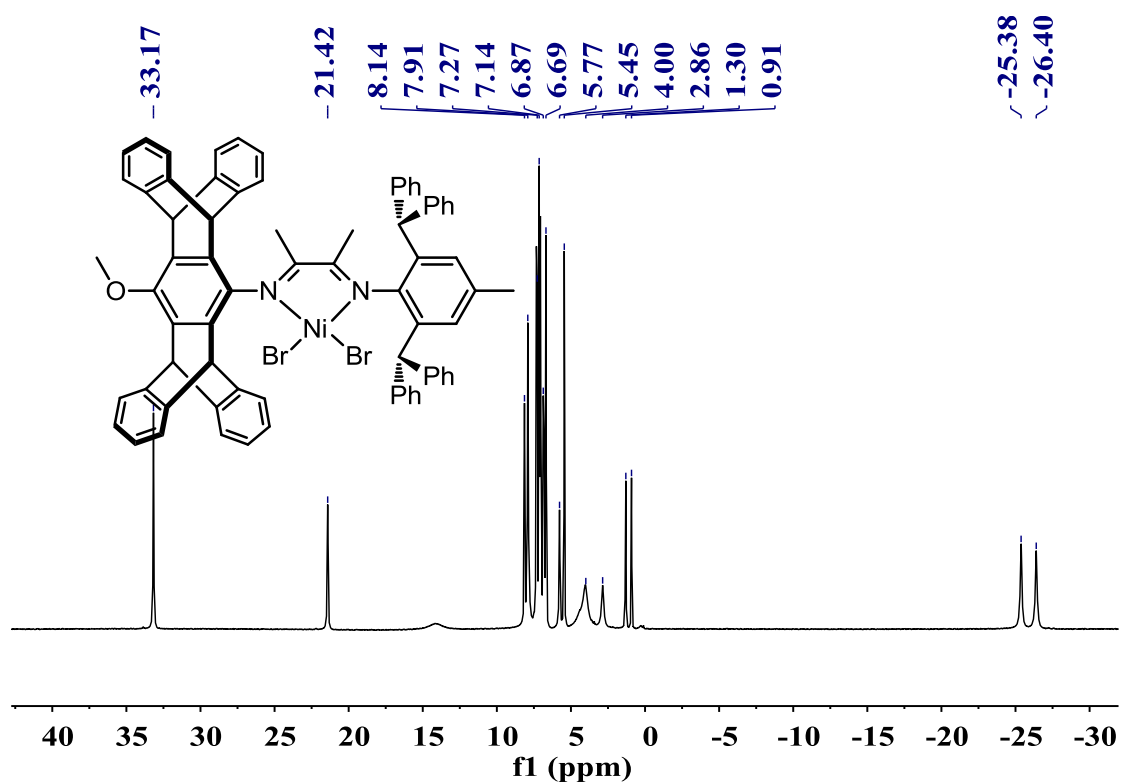

**Figure S21.**  $^1\text{H}$  NMR spectrum of **Cat1** in  $\text{CDCl}_3$

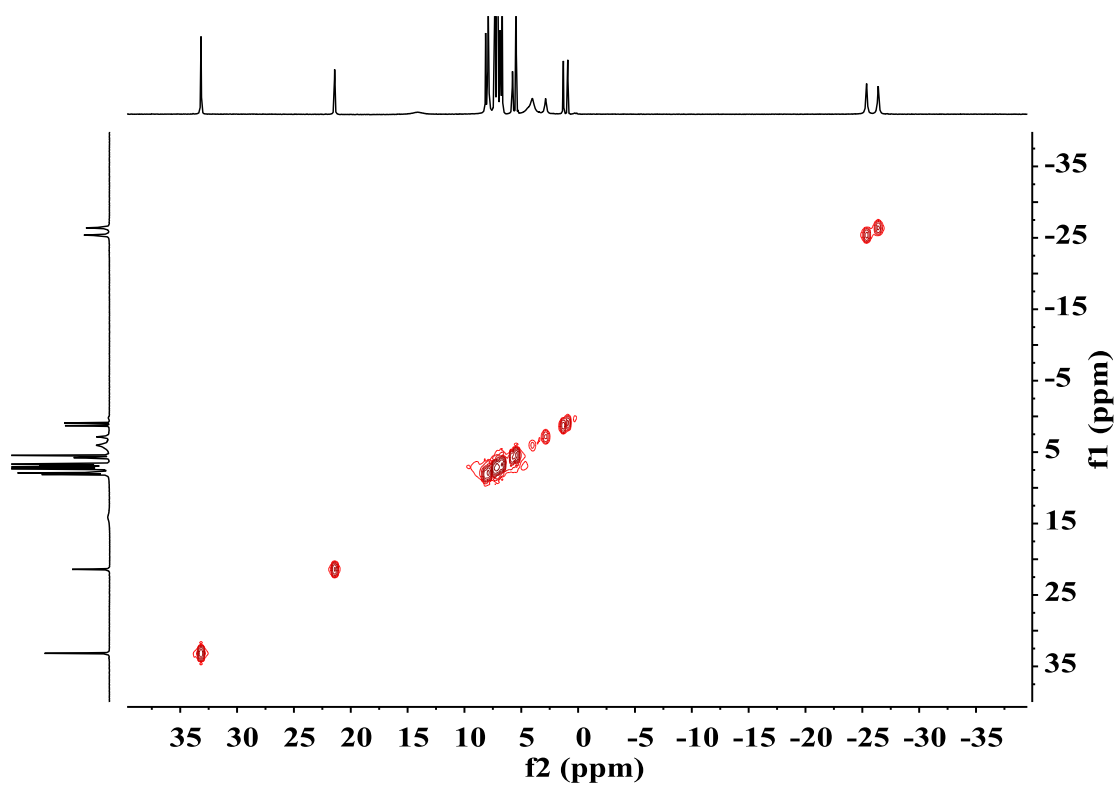

**Figure S22.**  $^1\text{H}$ - $^1\text{H}$  COSY NMR spectrum of **Cat1** in  $\text{CDCl}_3$ .

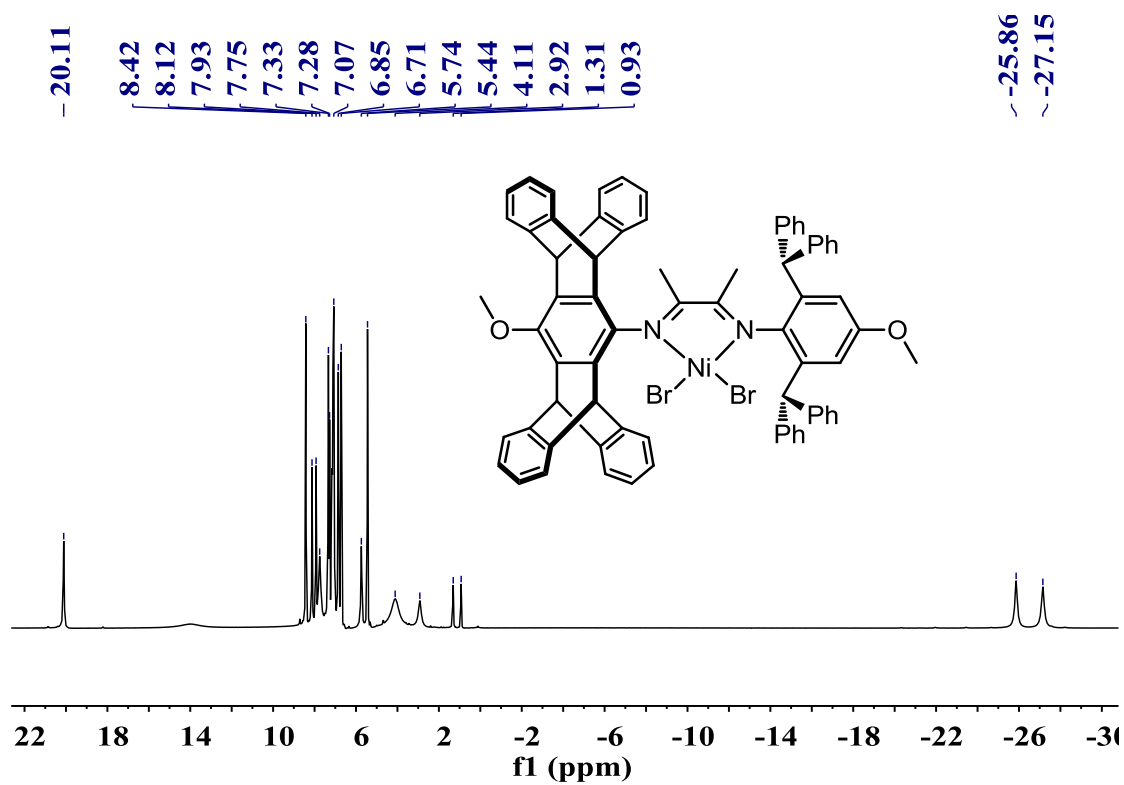

Figure S23.  $^1\text{H}$  NMR spectrum of Cat2 in  $\text{CDCl}_3$

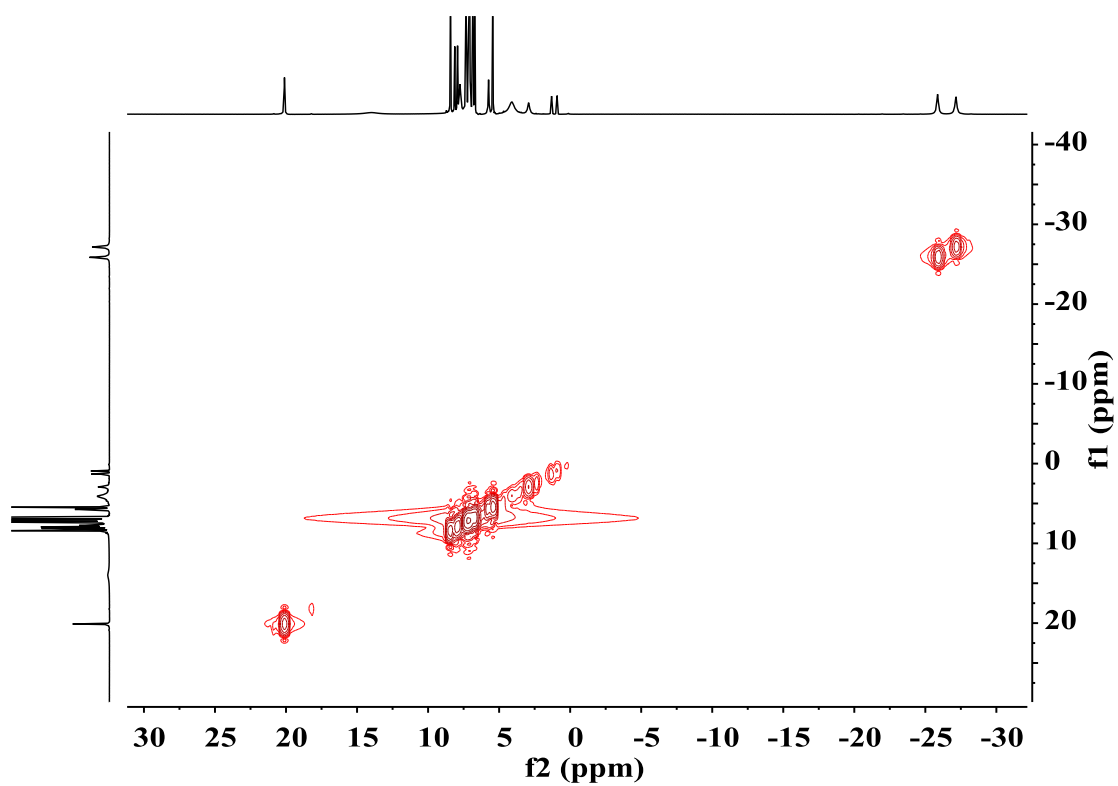

Figure S24.  $^1\text{H}$ - $^1\text{H}$  COSY NMR spectrum of Cat2 in  $\text{CDCl}_3$ .

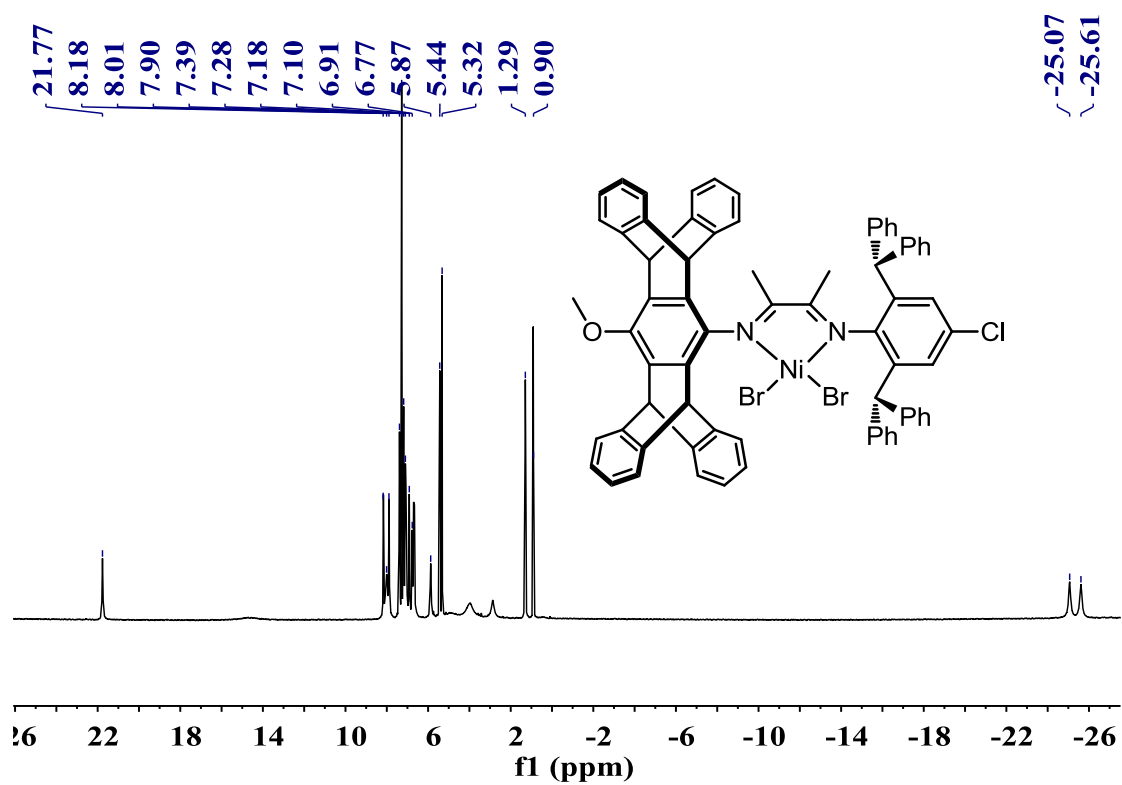

Figure S25.  $^1\text{H}$  NMR spectrum of Cat3 in  $\text{CDCl}_3$

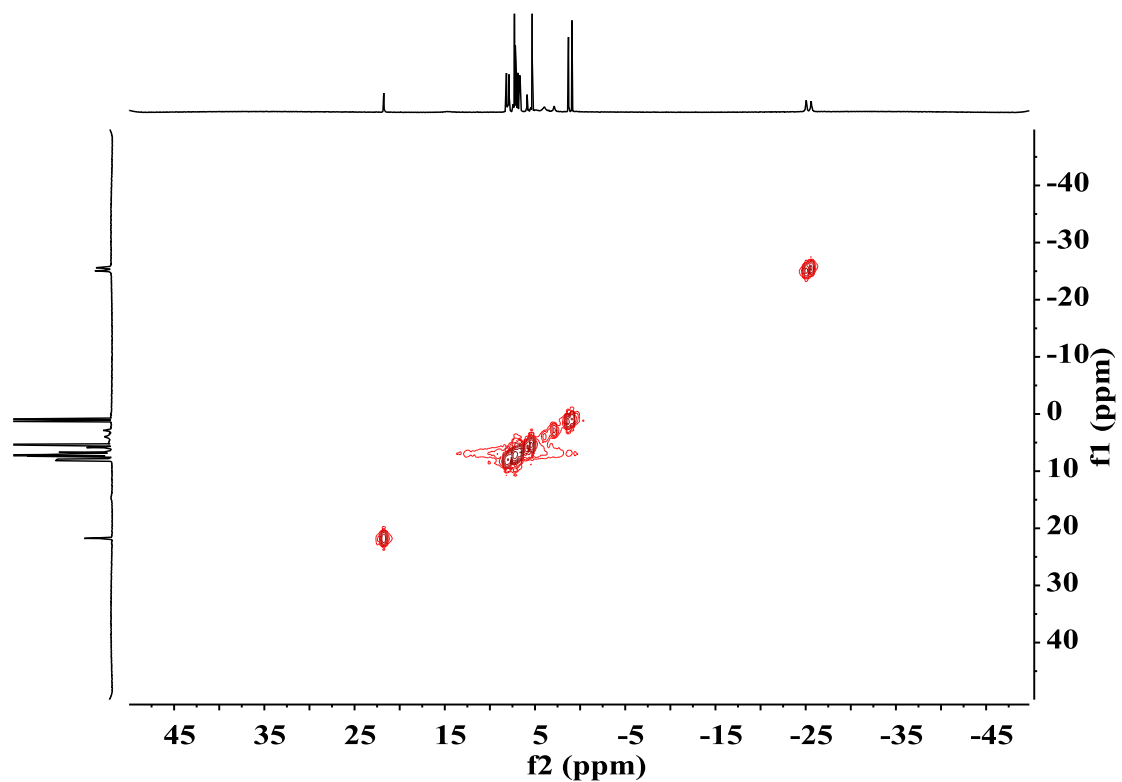

Figure S26.  $^1\text{H}$ - $^1\text{H}$  COSY NMR spectrum of Cat3 in  $\text{CDCl}_3$ .

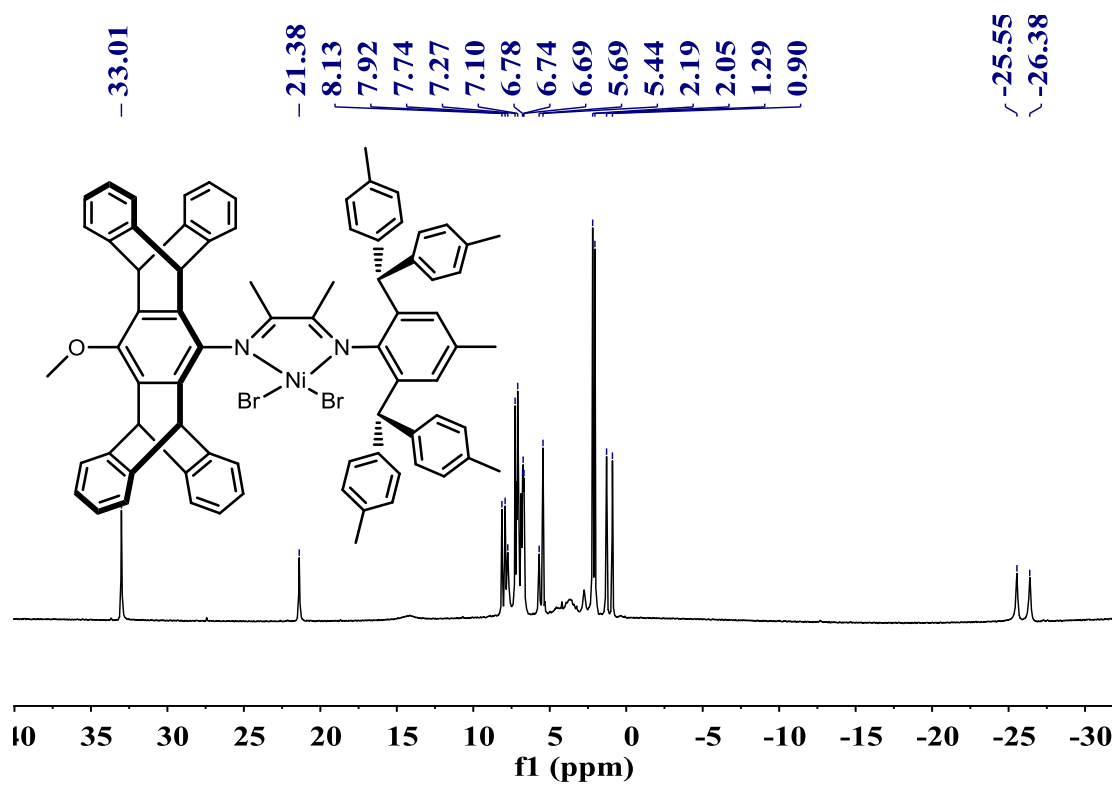

Figure S27.  $^1\text{H}$  NMR spectrum of Cat4 in  $\text{CDCl}_3$

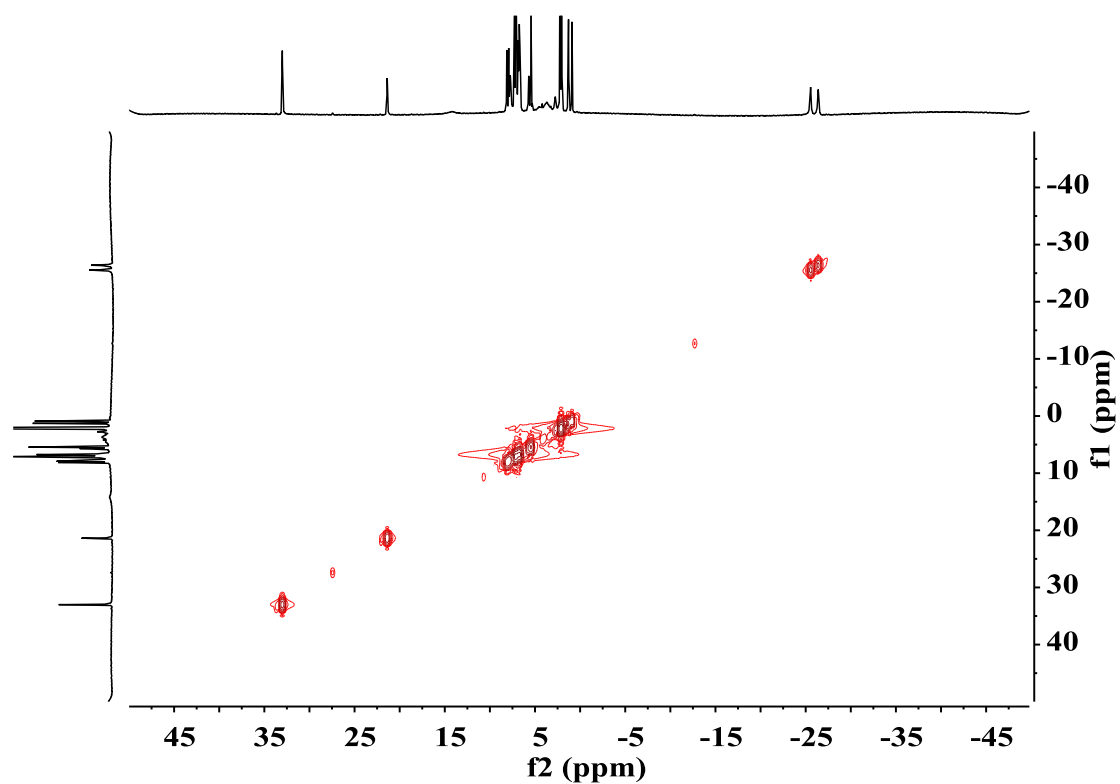

Figure S28.  $^1\text{H}$ - $^1\text{H}$  COSY NMR spectrum of Cat4 in  $\text{CDCl}_3$ .

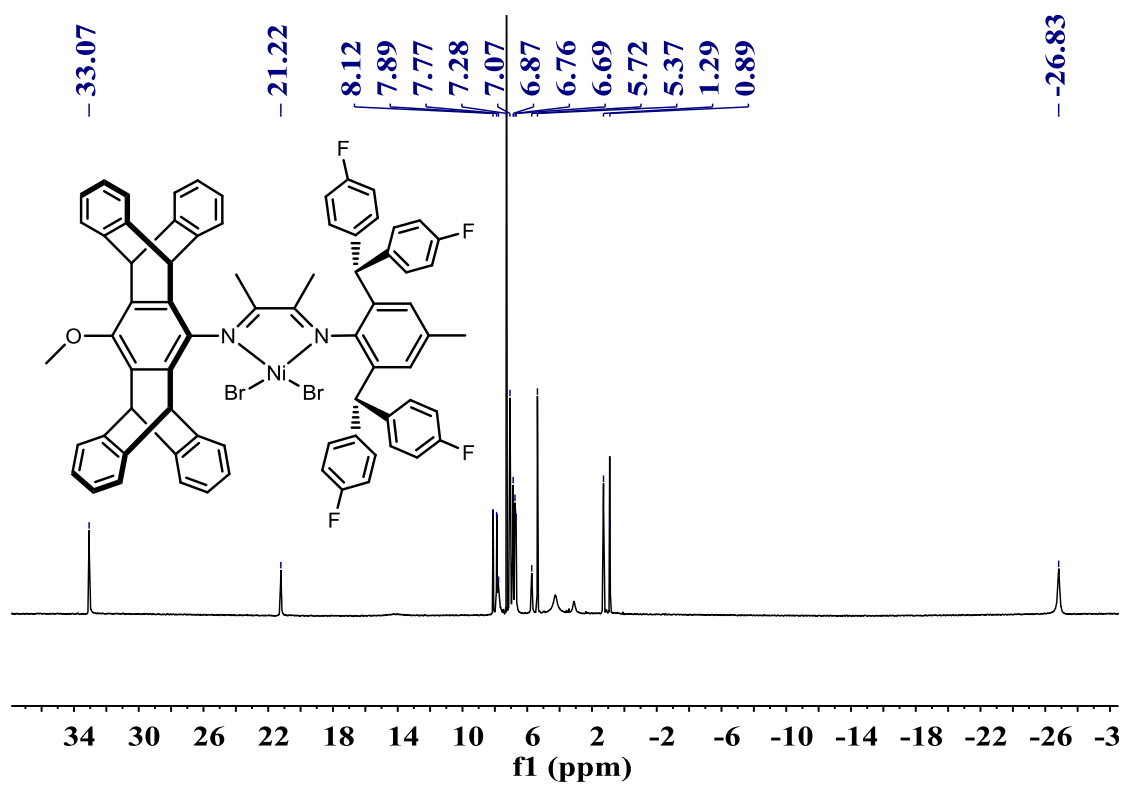

Figure S29.  $^1\text{H}$  NMR spectrum of Cat5 in  $\text{CDCl}_3$

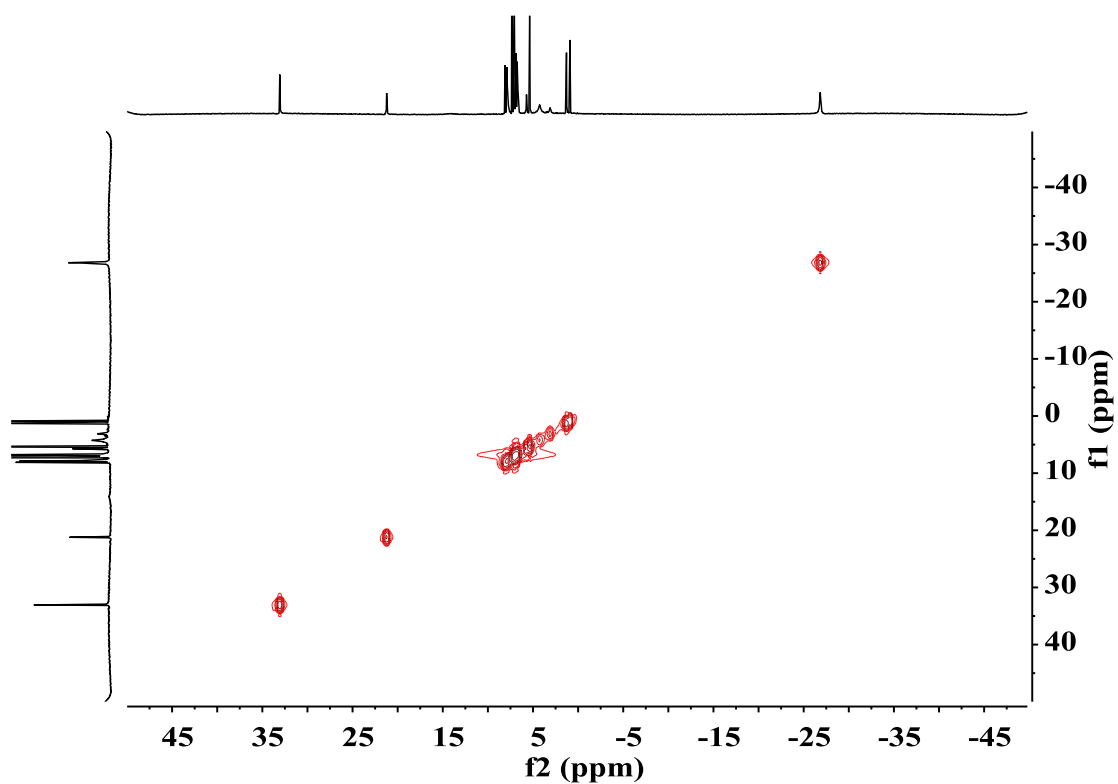

Figure S30.  $^1\text{H}$ - $^1\text{H}$  COSY NMR spectrum of Cat5 in  $\text{CDCl}_3$ .

## 5 NMR figures of (co)polymers

$$\text{Me groups} / 1000\text{C} = \frac{2 \cdot I_{\text{Me}}}{3 \cdot I_{\text{tot}}} * 1000 = \frac{2 \cdot 3}{3 \cdot (24.52 + 3)} * 1000 = 73$$

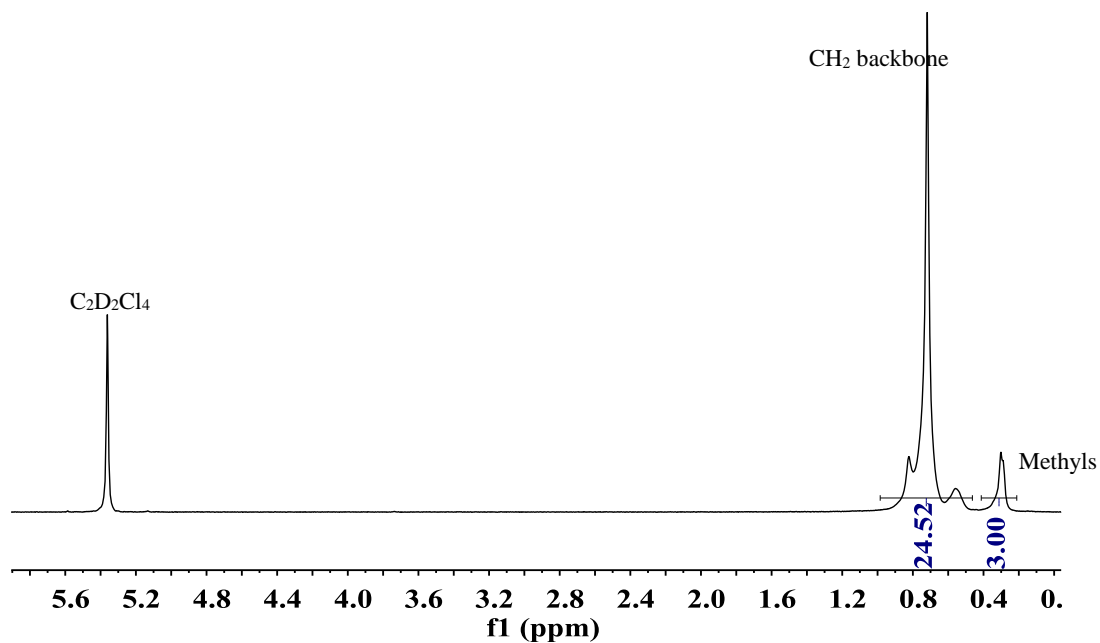

**Figure S31.** <sup>1</sup>H NMR spectrum (400 MHz, C<sub>2</sub>D<sub>2</sub>Cl<sub>4</sub>, 110 °C) of the polyethylene generated by **Cat1** from table 1, entry 1.

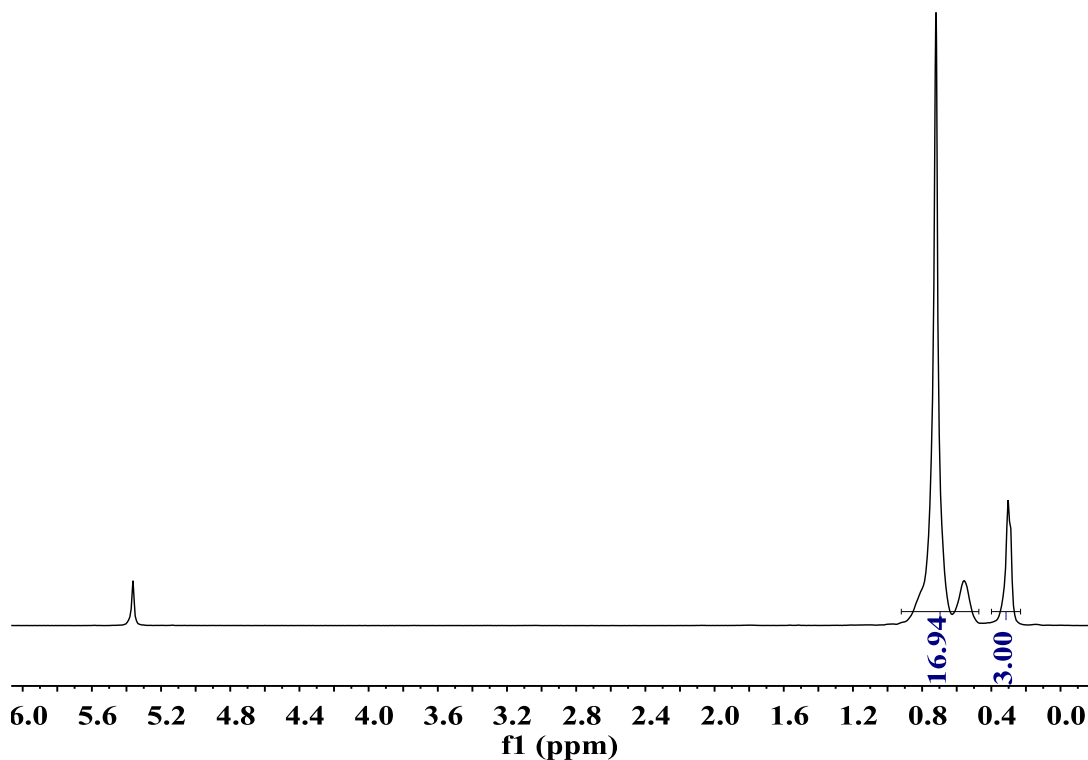

**Figure S32.** <sup>1</sup>H NMR spectrum (400 MHz, C<sub>2</sub>D<sub>2</sub>Cl<sub>4</sub>, 110 °C) of the polyethylene generated by **Cat1** from table 1, entry 2.

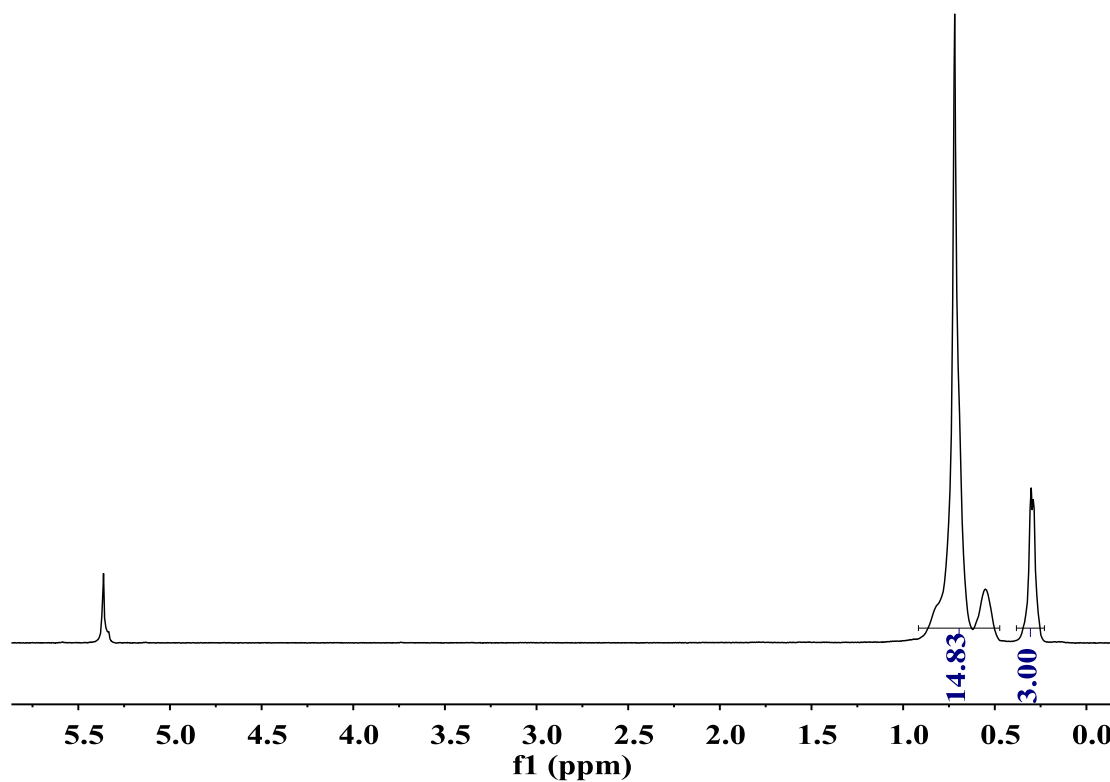

**Figure S33.**  $^1\text{H}$  NMR spectrum (400 MHz,  $\text{C}_2\text{D}_2\text{Cl}_4$ , 110  $^\circ\text{C}$ ) of the polyethylene generated by **Cat1** from table 1, entry 3.

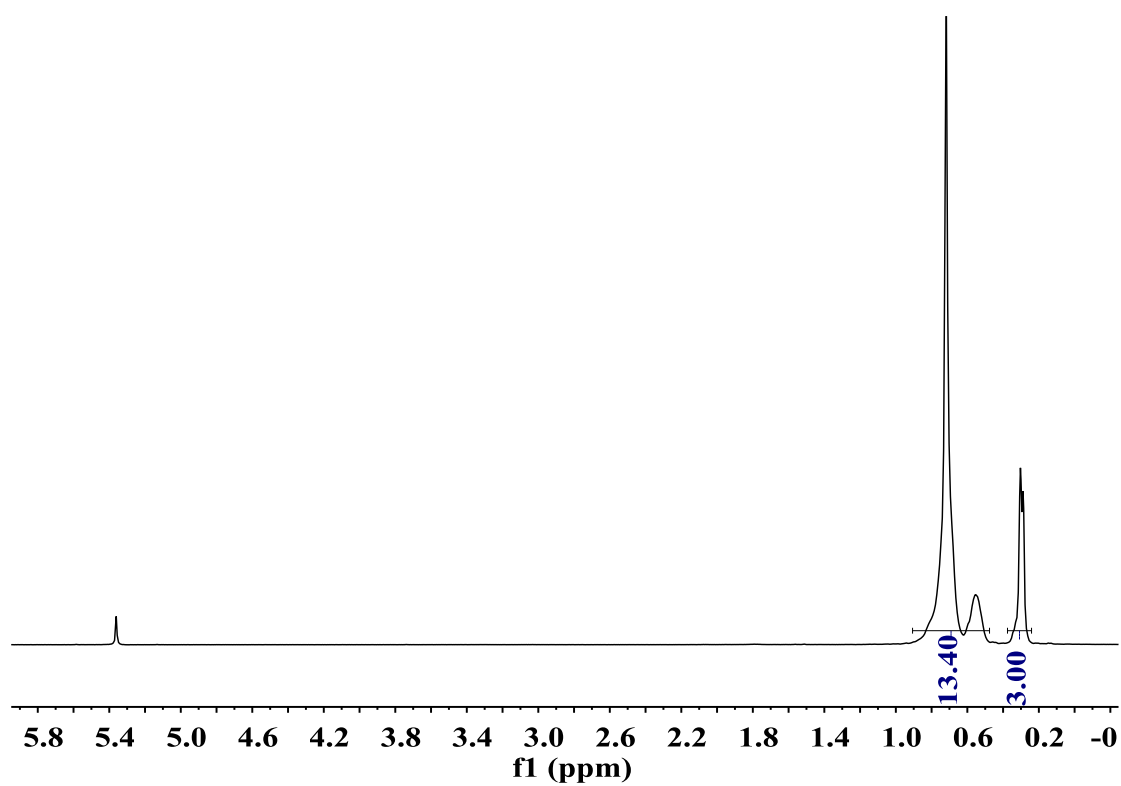

**Figure S34.**  $^1\text{H}$  NMR spectrum (400 MHz,  $\text{C}_2\text{D}_2\text{Cl}_4$ , 110  $^\circ\text{C}$ ) of the polyethylene generated by **Cat1** from table 1, entry 4.

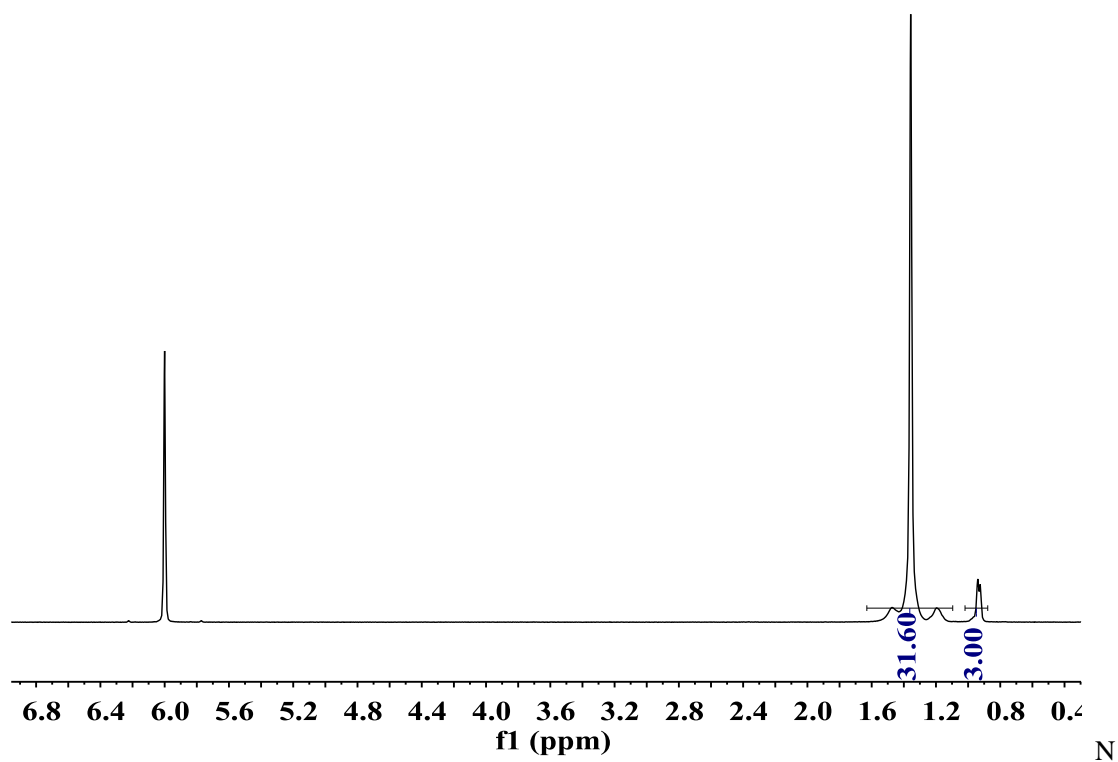

**Figure S35.**  $^1\text{H}$  NMR spectrum (400 MHz,  $\text{C}_2\text{D}_2\text{Cl}_4$ , 110  $^\circ\text{C}$ ) of the polyethylene generated by **Cat2** from table 1, entry 5.

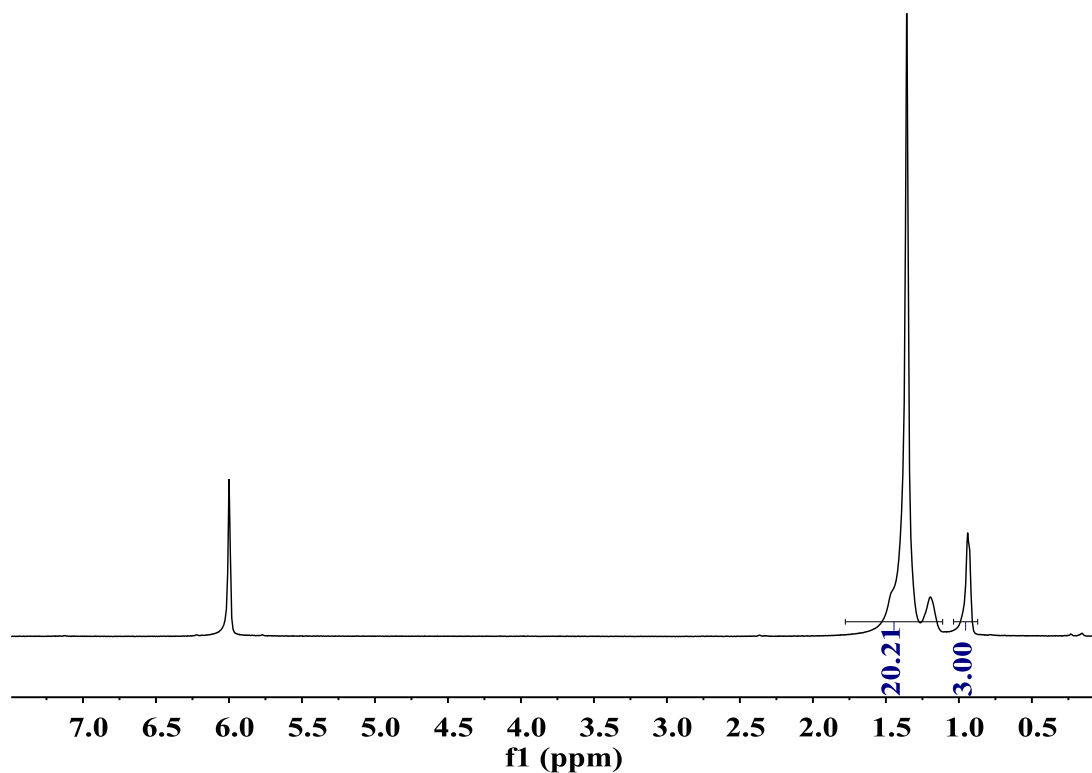

**Figure S36.**  $^1\text{H}$  NMR spectrum (400 MHz,  $\text{C}_2\text{D}_2\text{Cl}_4$ , 110  $^\circ\text{C}$ ) of the polyethylene generated by **Cat2** from table 1, entry 6.

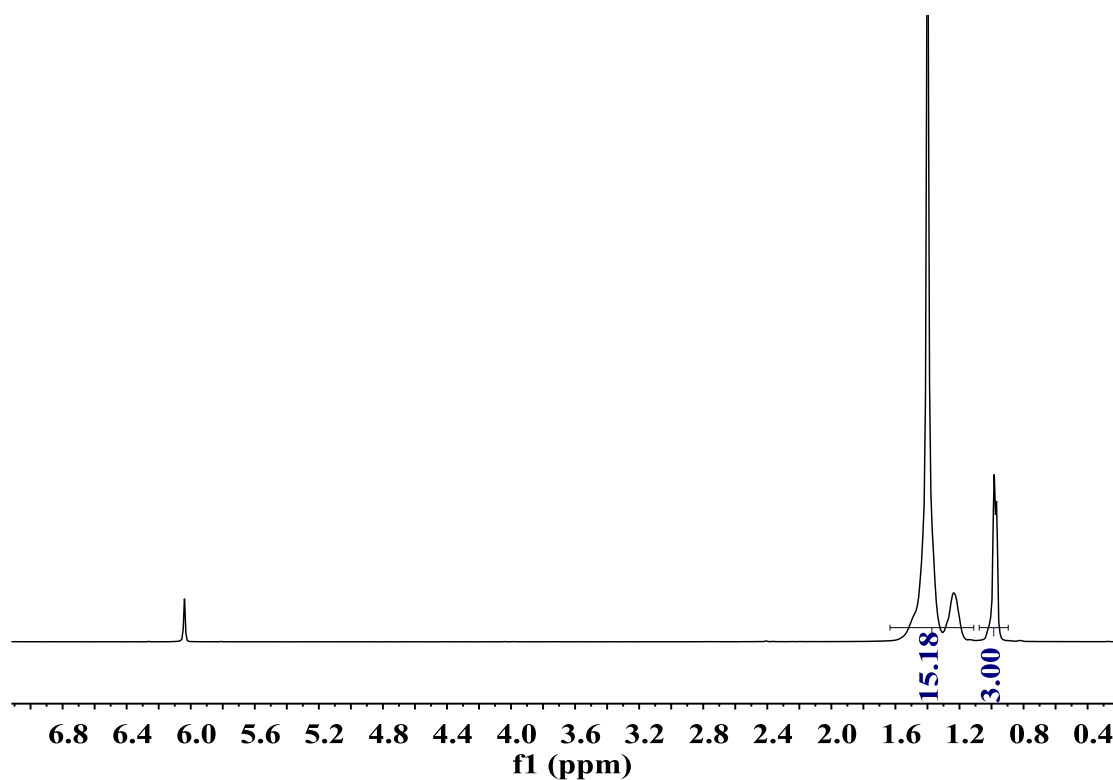

**Figure S37.**  $^1\text{H}$  NMR spectrum (400 MHz,  $\text{C}_2\text{D}_2\text{Cl}_4$ , 110  $^\circ\text{C}$ ) of the polyethylene generated by **Cat2** from table 1, entry 7.

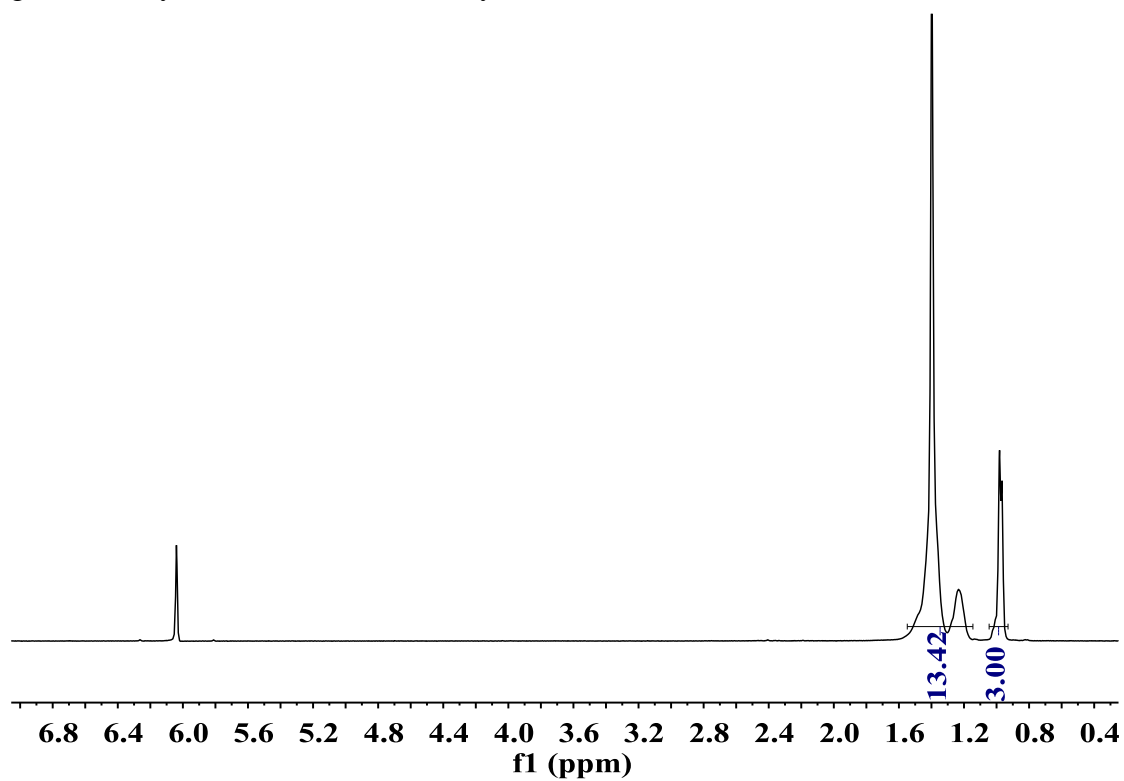

**Figure S38.**  $^1\text{H}$  NMR spectrum (400 MHz,  $\text{C}_2\text{D}_2\text{Cl}_4$ , 110  $^\circ\text{C}$ ) of the polyethylene generated by **Cat2** from table 1, entry 8.

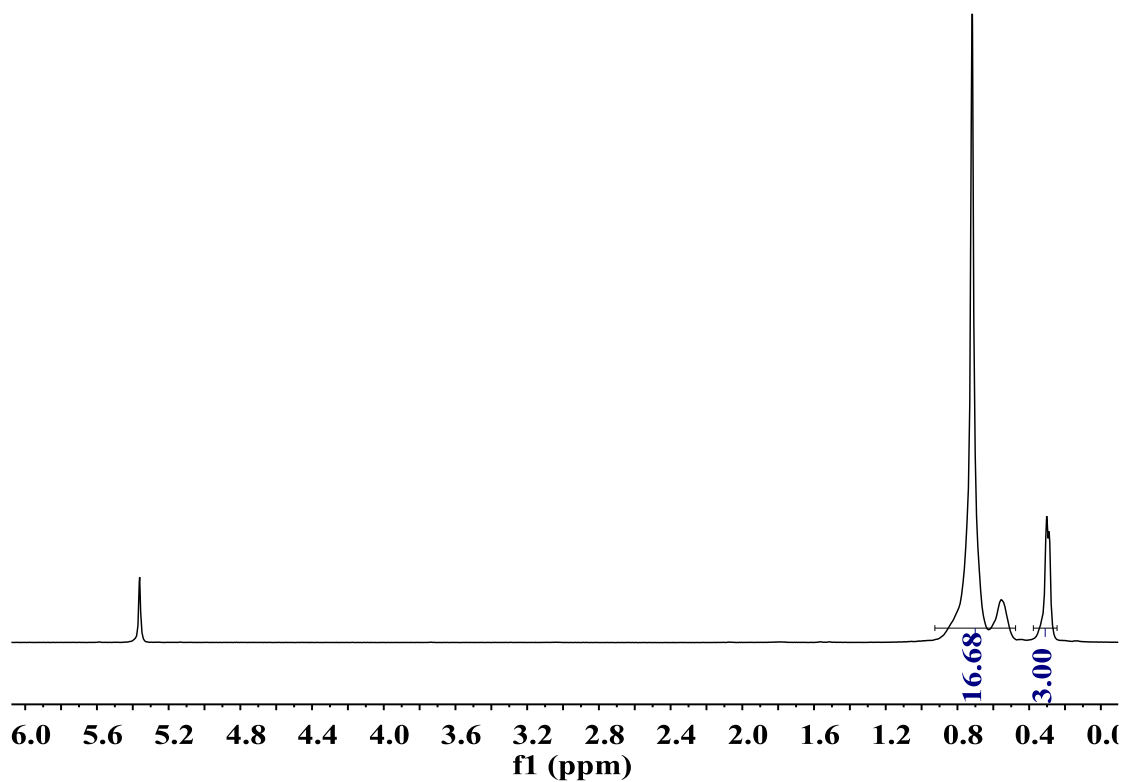

**Figure S39.**  $^1\text{H}$  NMR spectrum (400 MHz,  $\text{C}_2\text{D}_2\text{Cl}_4$ , 110  $^\circ\text{C}$ ) of the polyethylene generated by **Cat3** from table 1, entry 10.

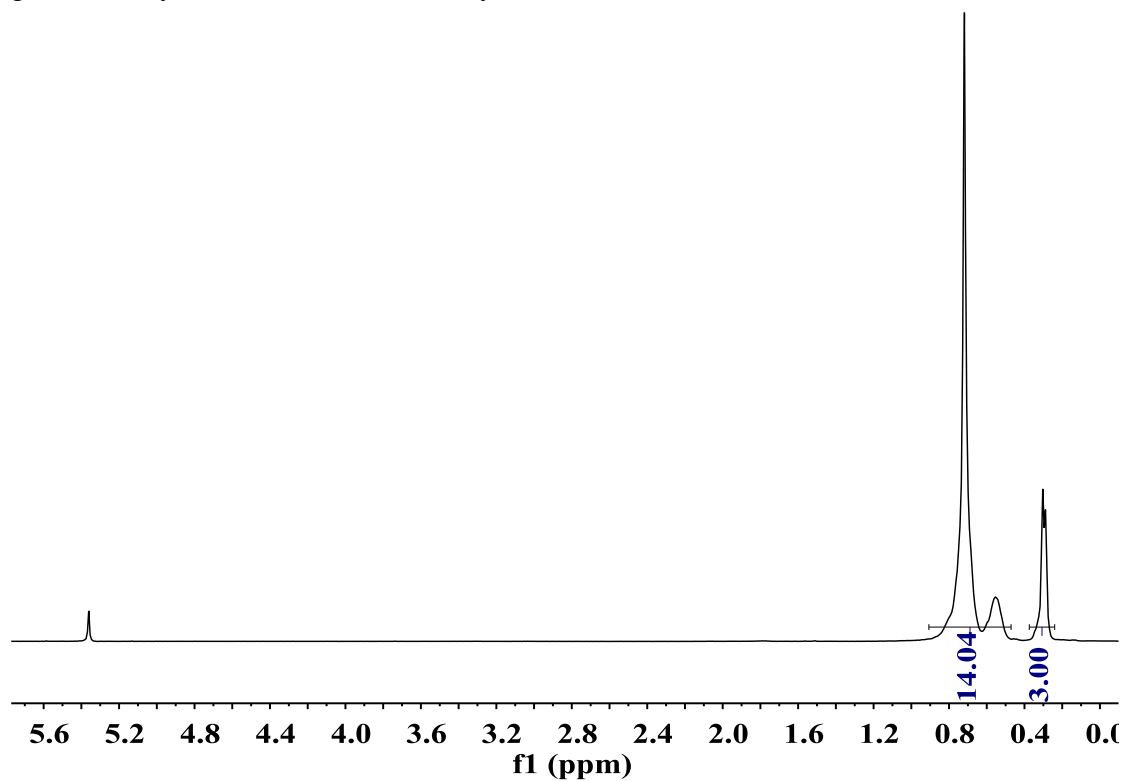

**Figure S40.**  $^1\text{H}$  NMR spectrum (400 MHz,  $\text{C}_2\text{D}_2\text{Cl}_4$ , 110  $^\circ\text{C}$ ) of the polyethylene generated by **Cat3** from table 1, entry 11.

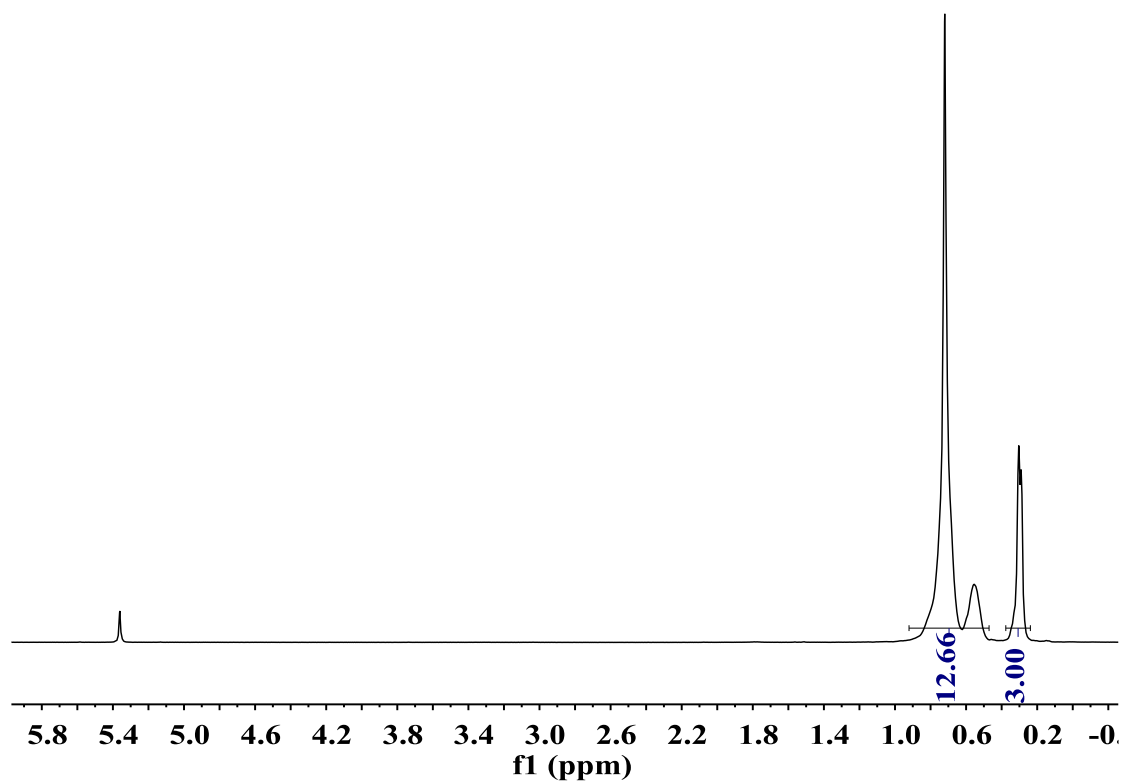

**Figure S41.**  $^1\text{H}$  NMR spectrum (400 MHz,  $\text{C}_2\text{D}_2\text{Cl}_4$ , 110  $^\circ\text{C}$ ) of the polyethylene generated by **Cat3** from table 1, entry 12.

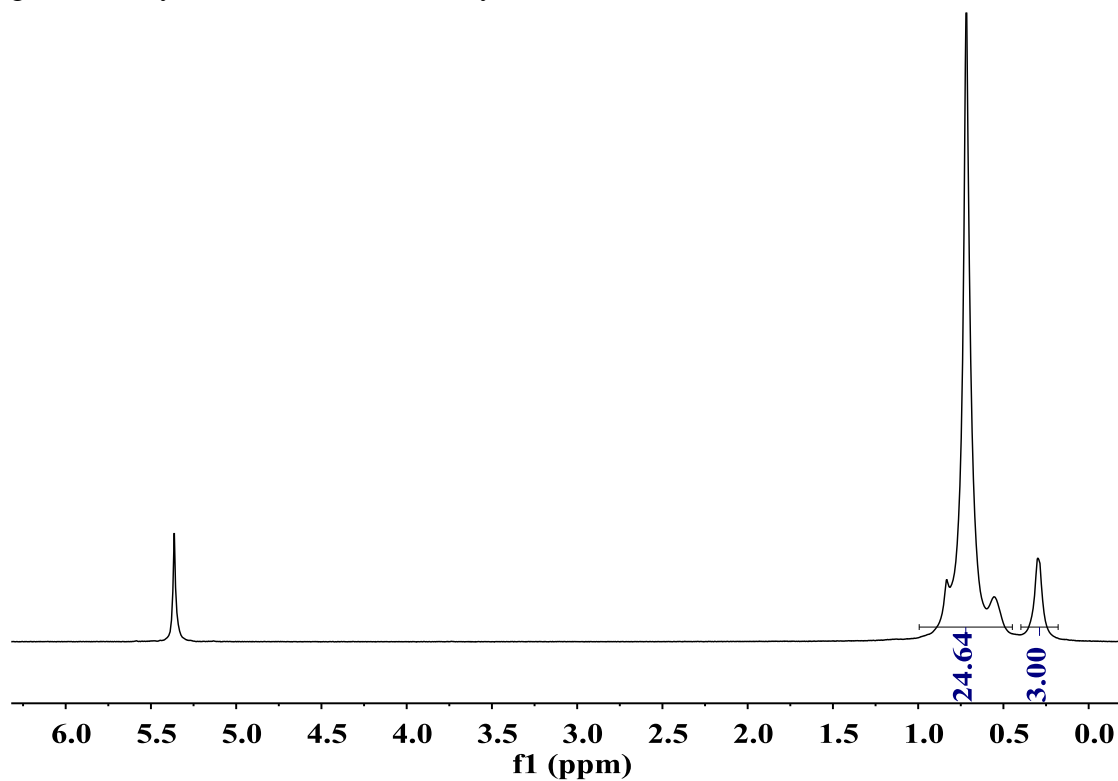

**Figure S42.**  $^1\text{H}$  NMR spectrum (400 MHz,  $\text{C}_2\text{D}_2\text{Cl}_4$ , 110  $^\circ\text{C}$ ) of the polyethylene generated by **Cat4** from table 1, entry 13.

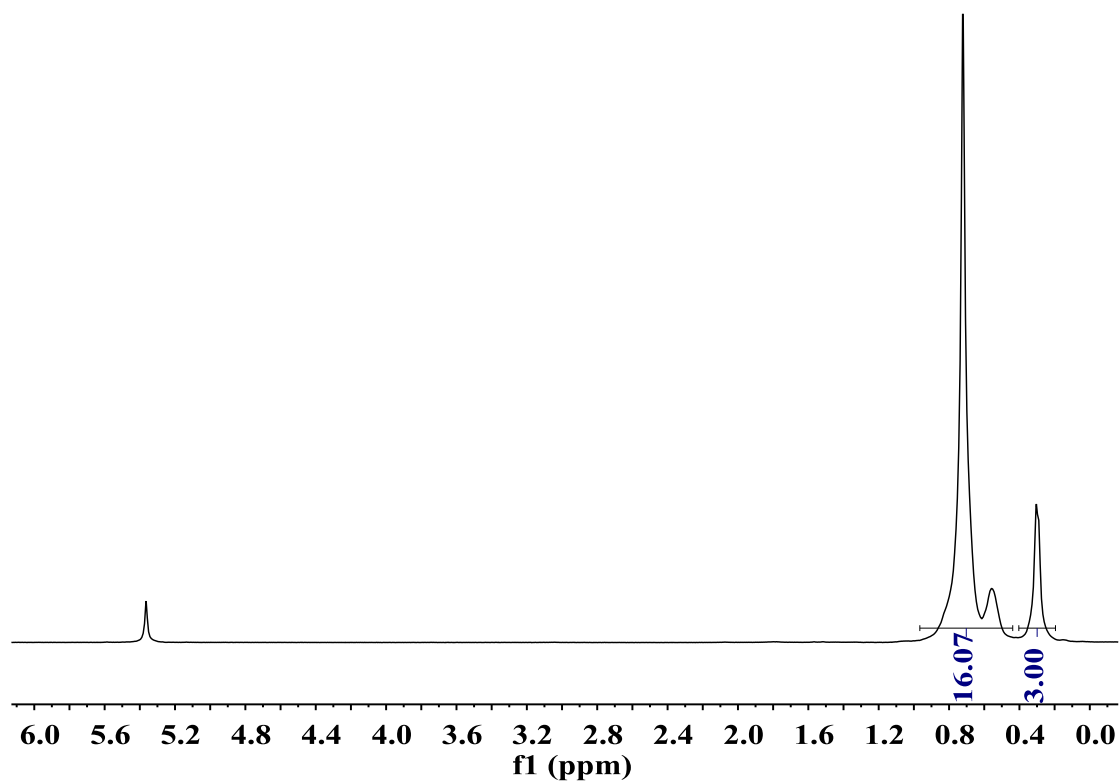

**Figure S43.**  $^1\text{H}$  NMR spectrum (400 MHz,  $\text{C}_2\text{D}_2\text{Cl}_4$ , 110  $^\circ\text{C}$ ) of the polyethylene generated by **Cat4** from table 1, entry 15.

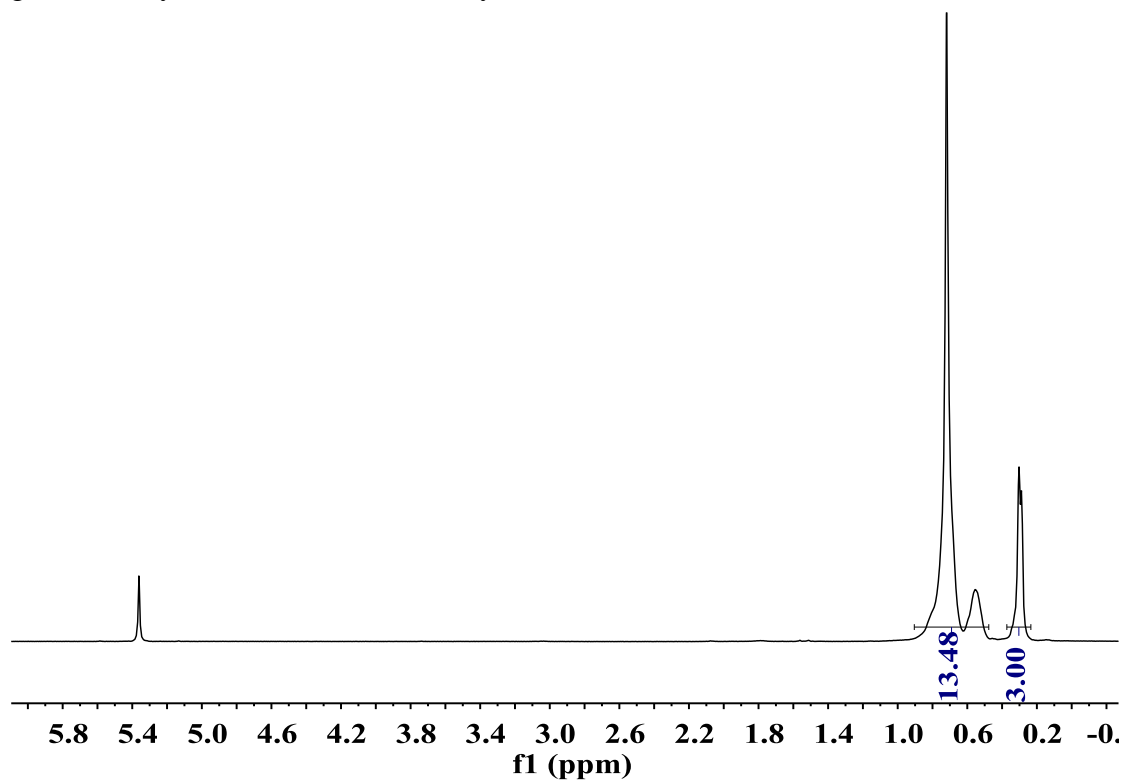

**Figure S44.**  $^1\text{H}$  NMR spectrum (400 MHz,  $\text{C}_2\text{D}_2\text{Cl}_4$ , 110  $^\circ\text{C}$ ) of the polyethylene generated by **Cat4** from table 1, entry 16.

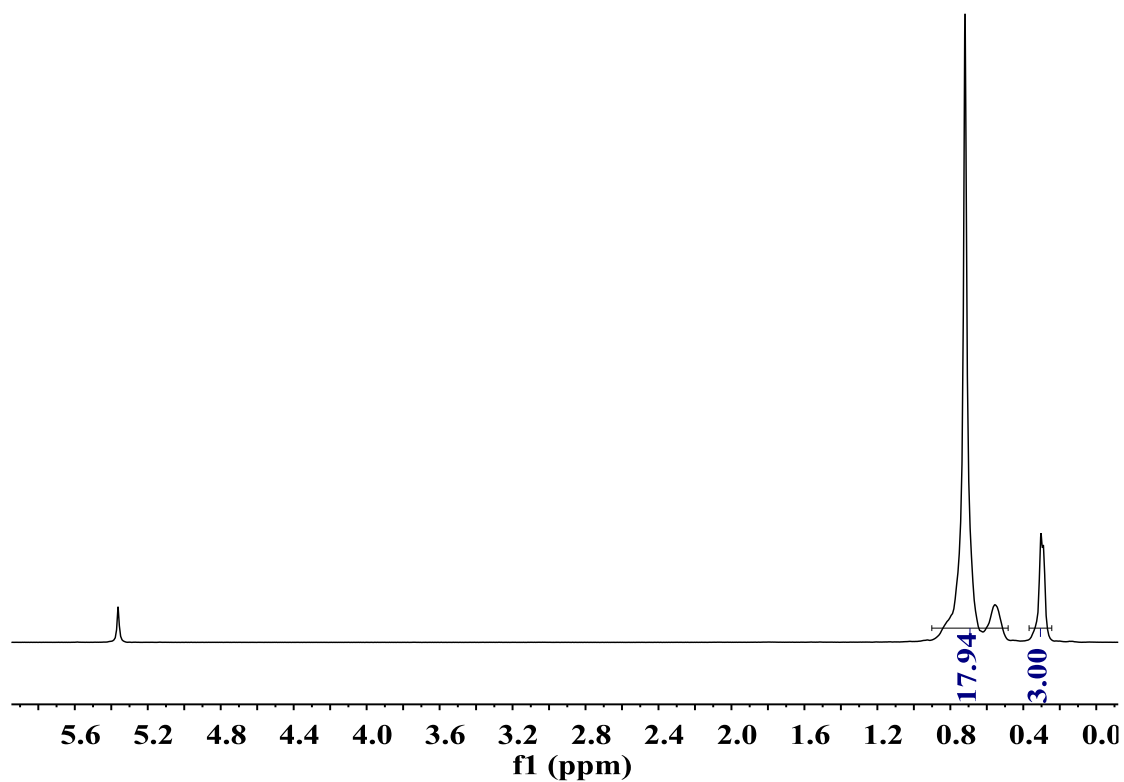

**Figure S45.**  $^1\text{H}$  NMR spectrum (400 MHz,  $\text{C}_2\text{D}_2\text{Cl}_4$ , 110  $^\circ\text{C}$ ) of the polyethylene generated by **Cat5** from table 1, entry 18.

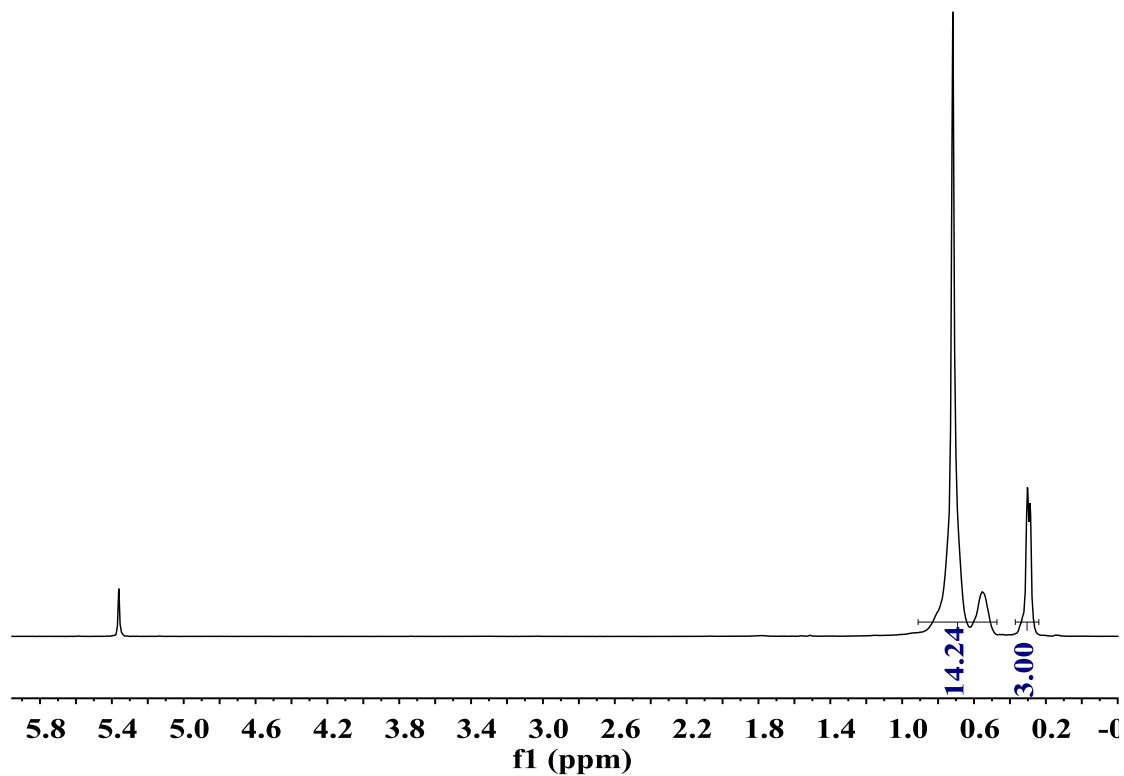

**Figure S46.**  $^1\text{H}$  NMR spectrum (400 MHz,  $\text{C}_2\text{D}_2\text{Cl}_4$ , 110  $^\circ\text{C}$ ) of the polyethylene generated by **Cat5** from table 1, entry 19.

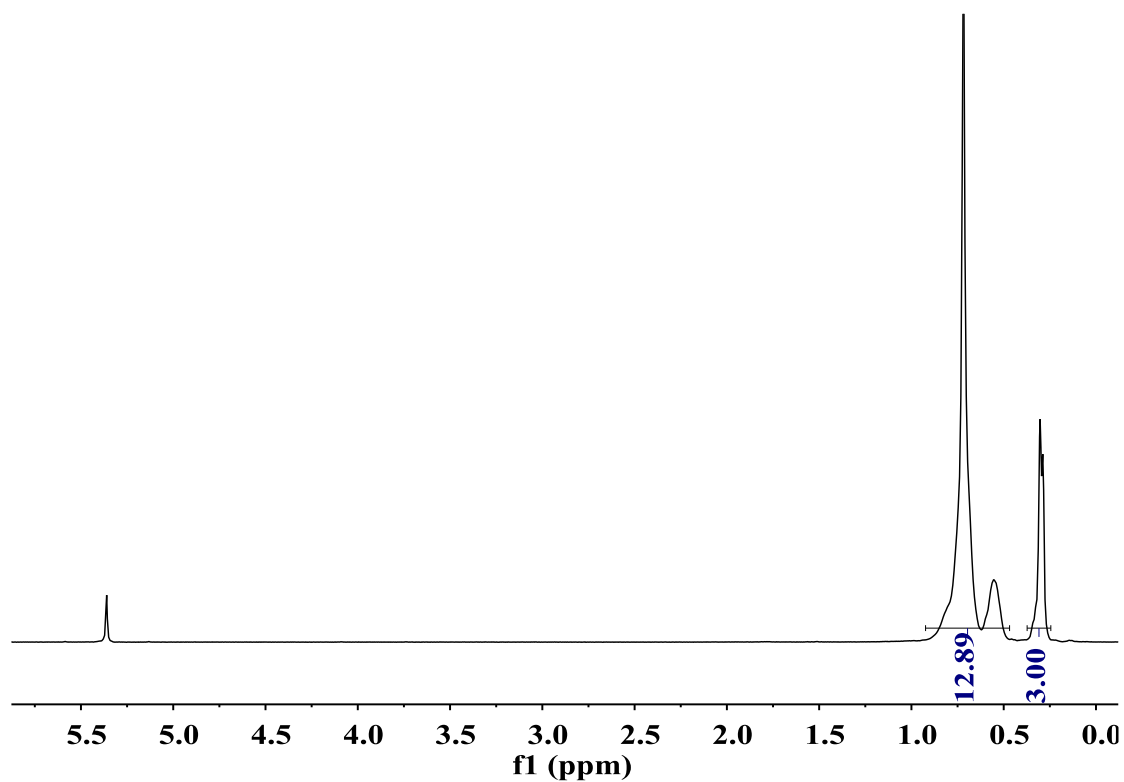

**Figure S47.** <sup>1</sup>H NMR spectrum (400 MHz, C<sub>2</sub>D<sub>2</sub>Cl<sub>4</sub>, 110 °C) of the polyethylene generated by **Cat5** from table 1, entry 20.

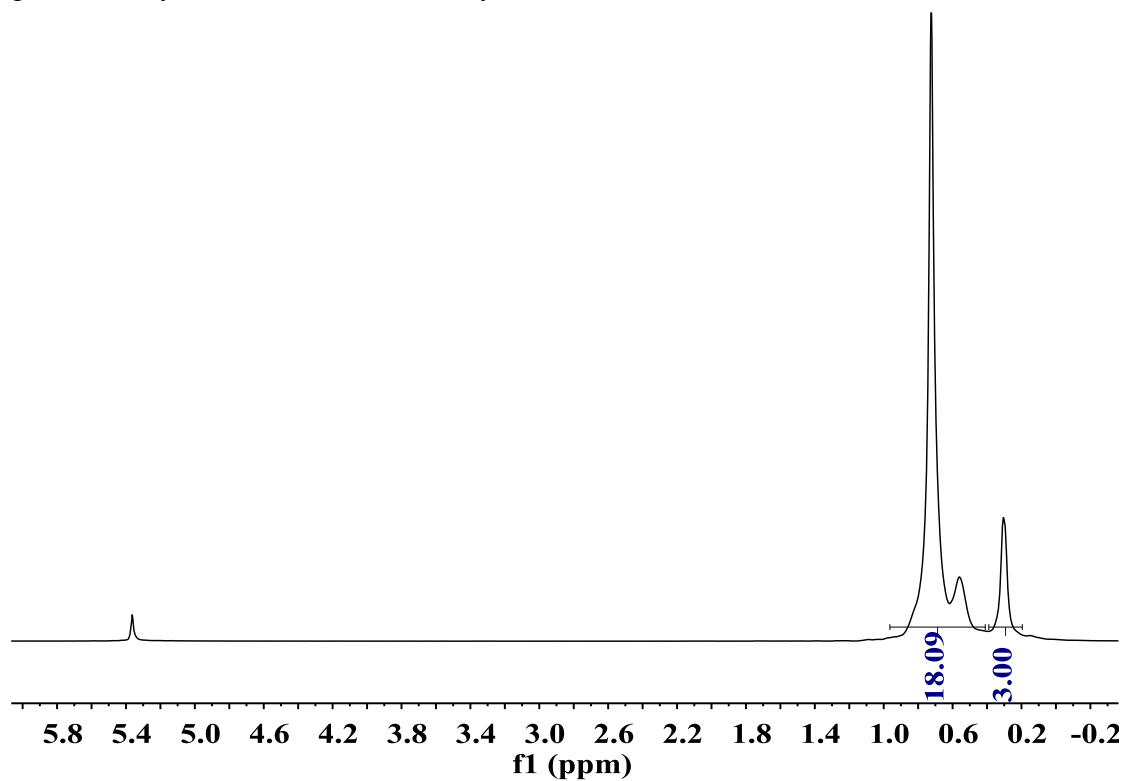

**Figure S48.** <sup>1</sup>H NMR spectrum (400 MHz, C<sub>2</sub>D<sub>2</sub>Cl<sub>4</sub>, 110 °C) of the polyethylene generated by **Cat1** from table 1, entry 21.

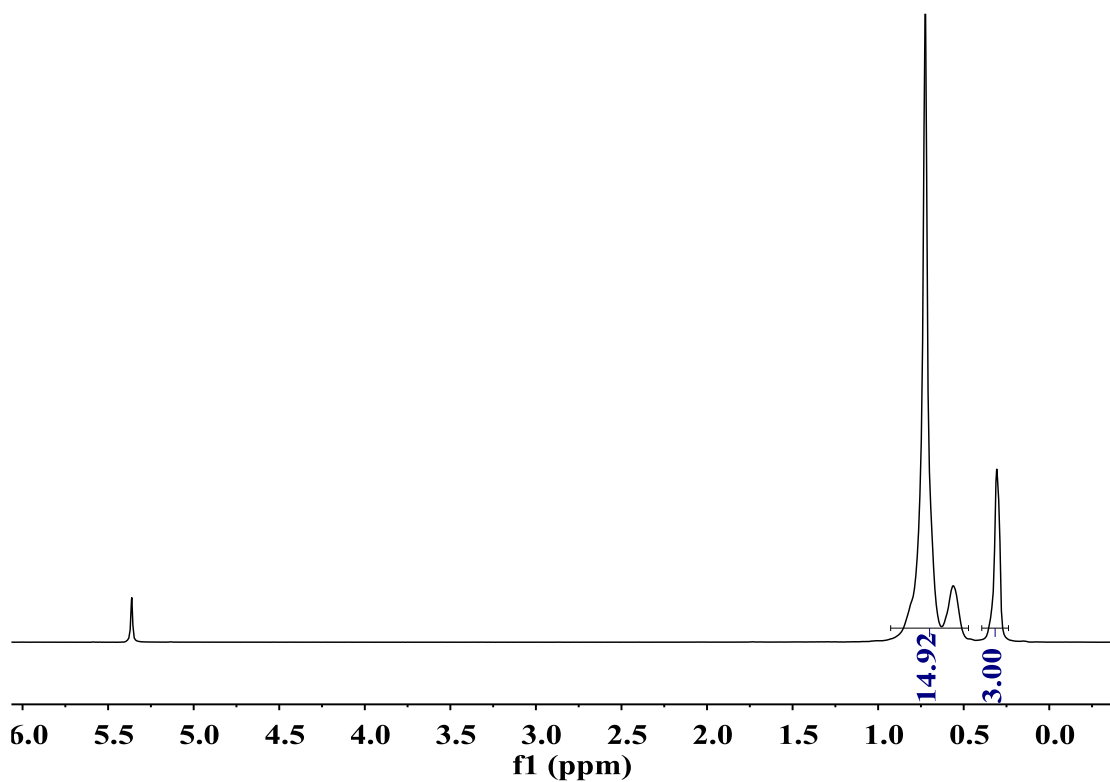

**Figure S49.**  $^1\text{H}$  NMR spectrum (400 MHz,  $\text{C}_2\text{D}_2\text{Cl}_4$ , 110  $^\circ\text{C}$ ) of the polyethylene generated by **Cat1** from table 1, entry 22.

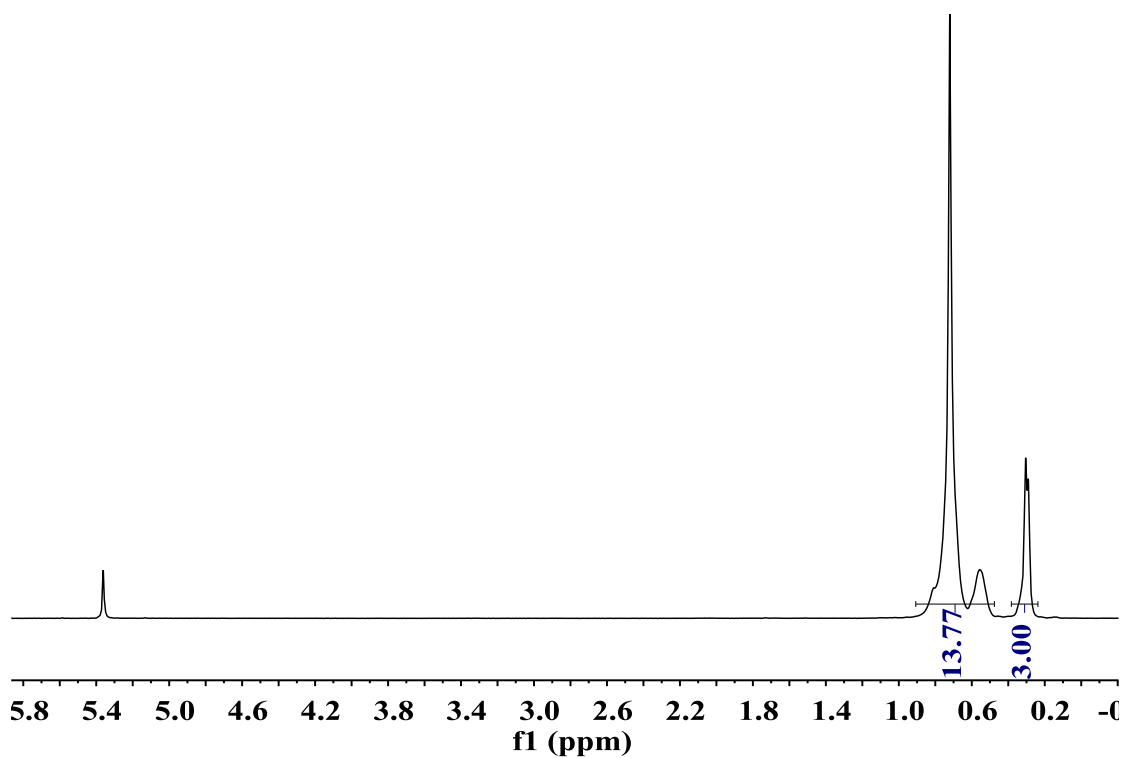

**Figure S50.**  $^1\text{H}$  NMR spectrum (400 MHz,  $\text{C}_2\text{D}_2\text{Cl}_4$ , 110  $^\circ\text{C}$ ) of the polyethylene generated by **Cat1** from table 1, entry 23.

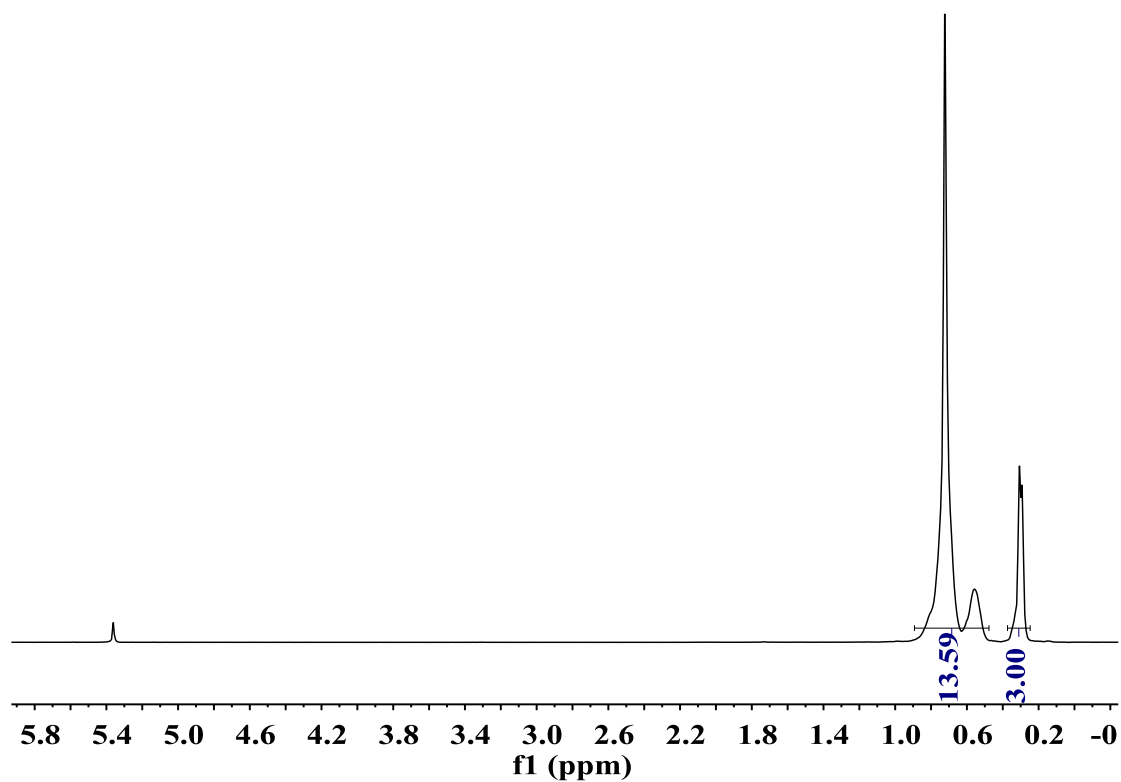

**Figure S51.** <sup>1</sup>H NMR spectrum (400 MHz, C<sub>2</sub>D<sub>2</sub>Cl<sub>4</sub>, 110 °C) of the polyethylene generated by **Cat1** from table 1, entry 24.

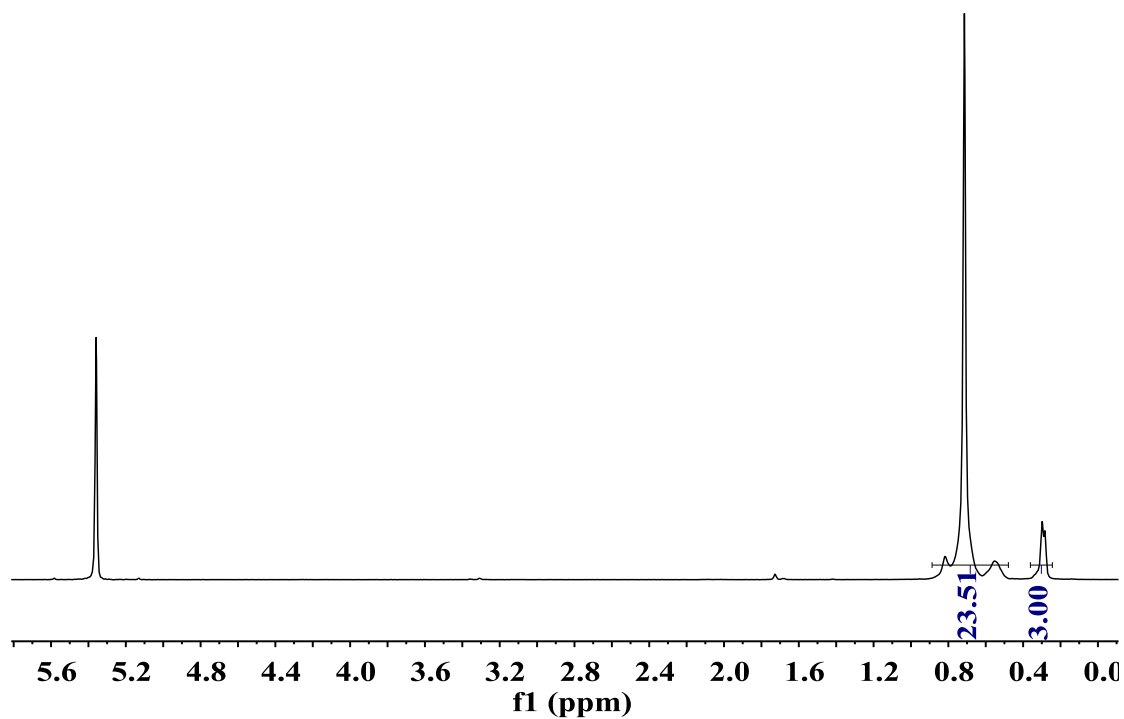

**Figure S52.** <sup>1</sup>H NMR spectrum (400 MHz, C<sub>2</sub>D<sub>2</sub>Cl<sub>4</sub>, 110 °C) of the polyethylene generated by **Cat2** from table 1, entry 25.

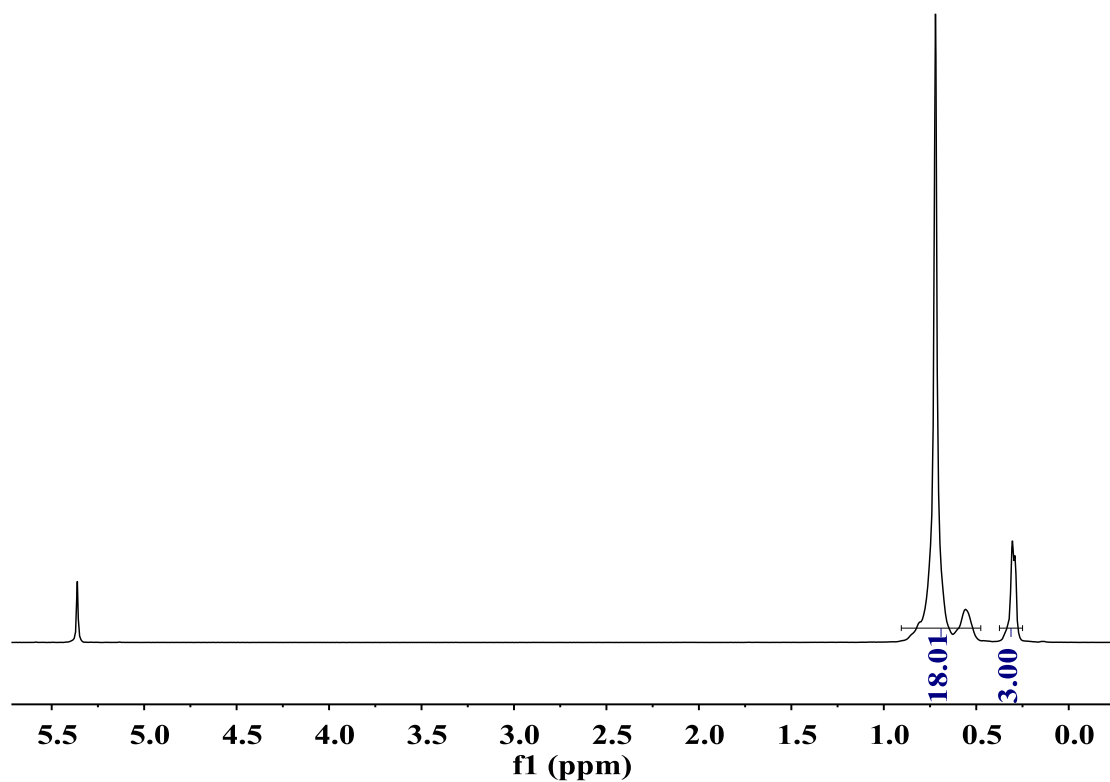

**Figure S53.** <sup>1</sup>H NMR spectrum (400 MHz, C<sub>2</sub>D<sub>2</sub>Cl<sub>4</sub>, 110 °C) of the polyethylene generated by **Cat3** from table 1, entry 26.

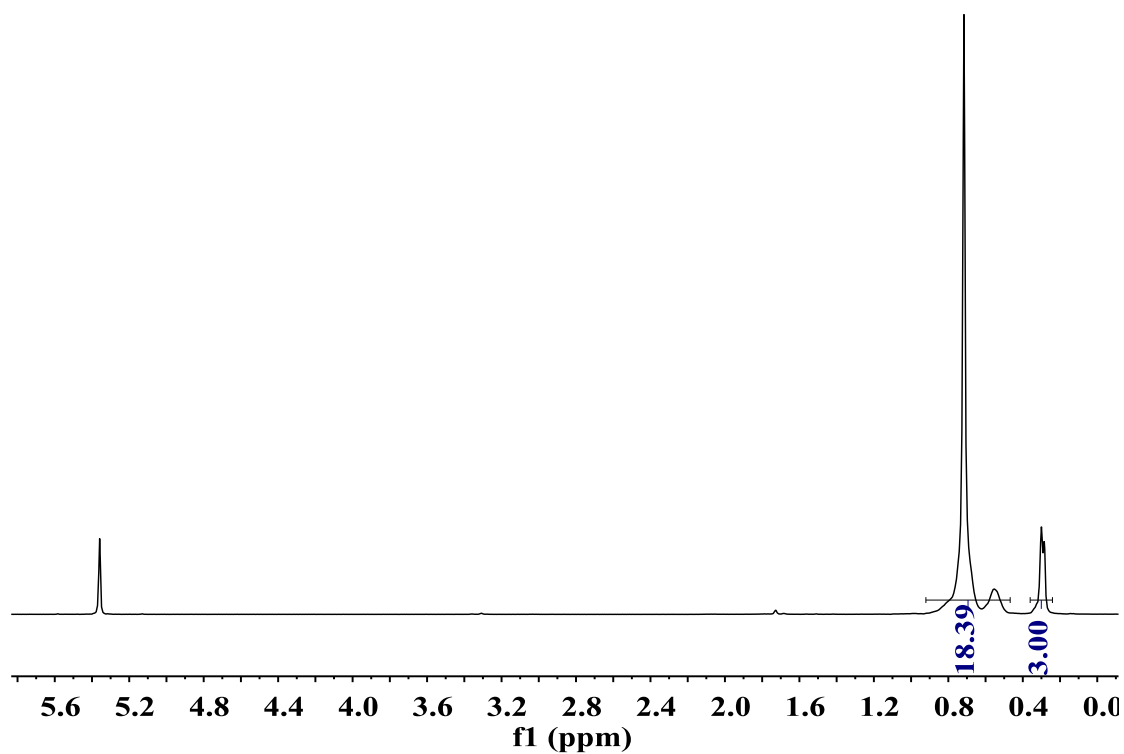

**Figure S54.** <sup>1</sup>H NMR spectrum (400 MHz, C<sub>2</sub>D<sub>2</sub>Cl<sub>4</sub>, 110 °C) of the polyethylene generated by **Cat4** from table 1, entry 27.

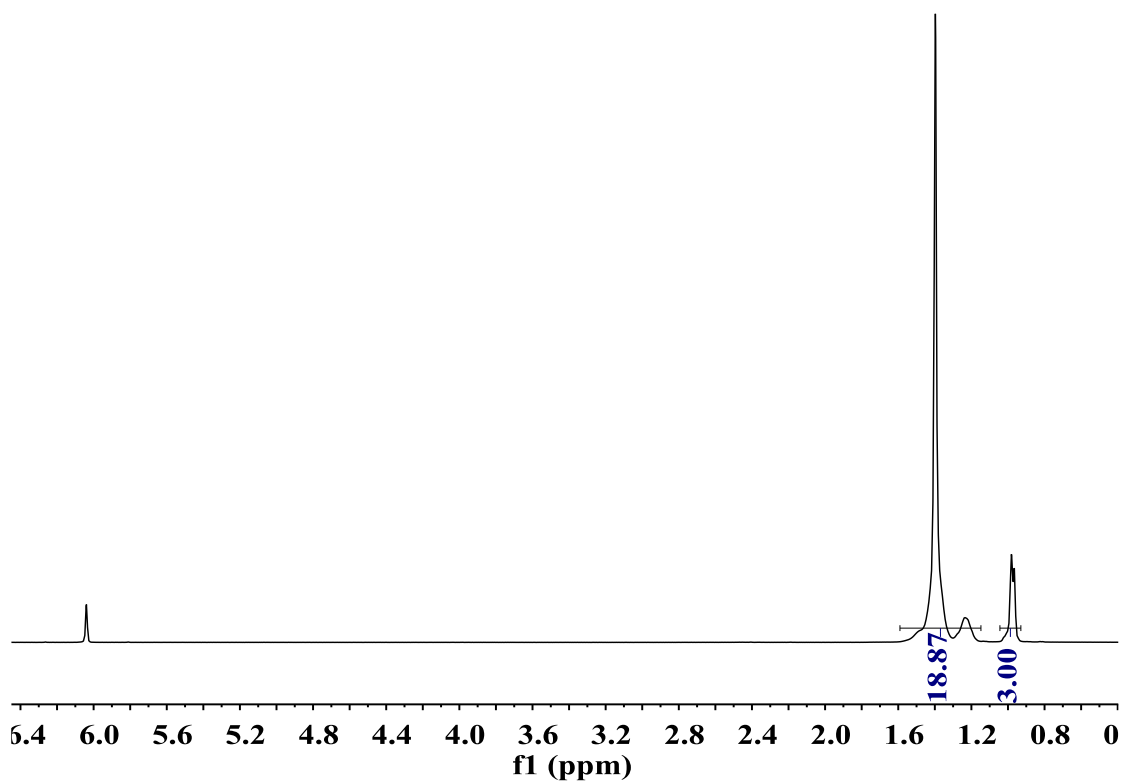

**Figure S55.**  $^1\text{H}$  NMR spectrum (400 MHz,  $\text{C}_2\text{D}_2\text{Cl}_4$ , 110  $^\circ\text{C}$ ) of the polyethylene generated by **Cat5** from table 1, entry 28.

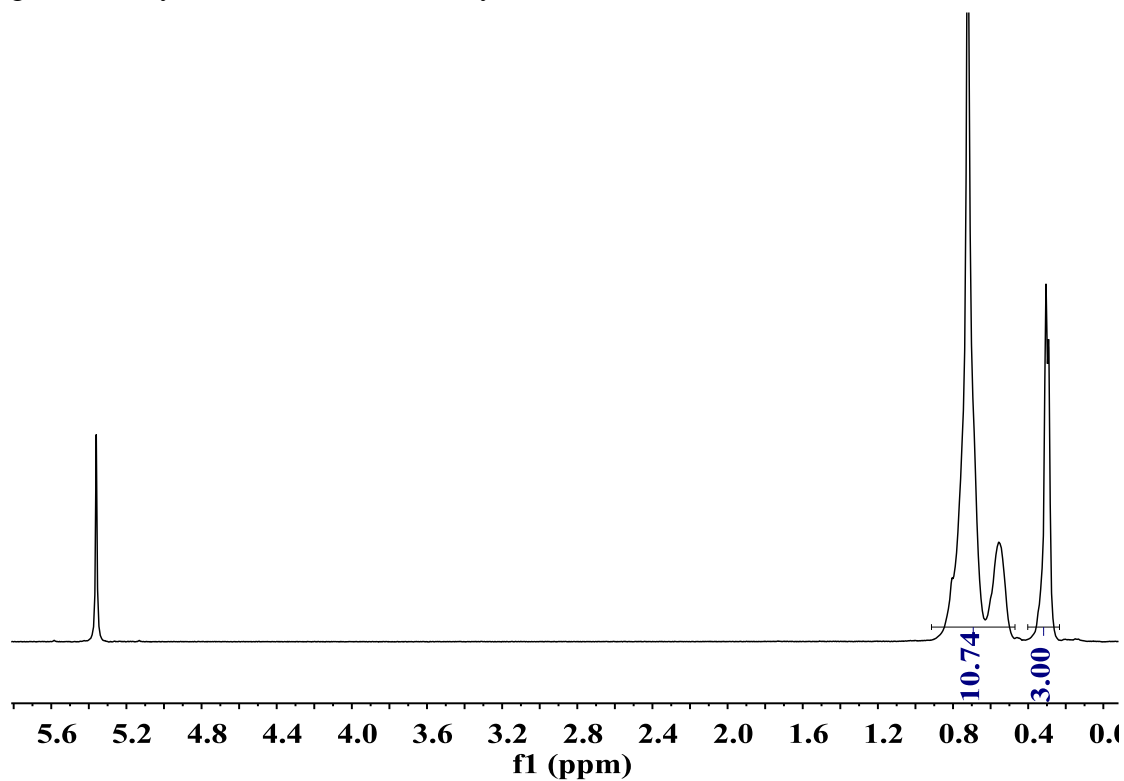

**Figure S56.**  $^1\text{H}$  NMR spectrum (400 MHz,  $\text{C}_2\text{D}_2\text{Cl}_4$ , 110  $^\circ\text{C}$ ) of the polyethylene generated by **Cat3** from table 1, entry 29.

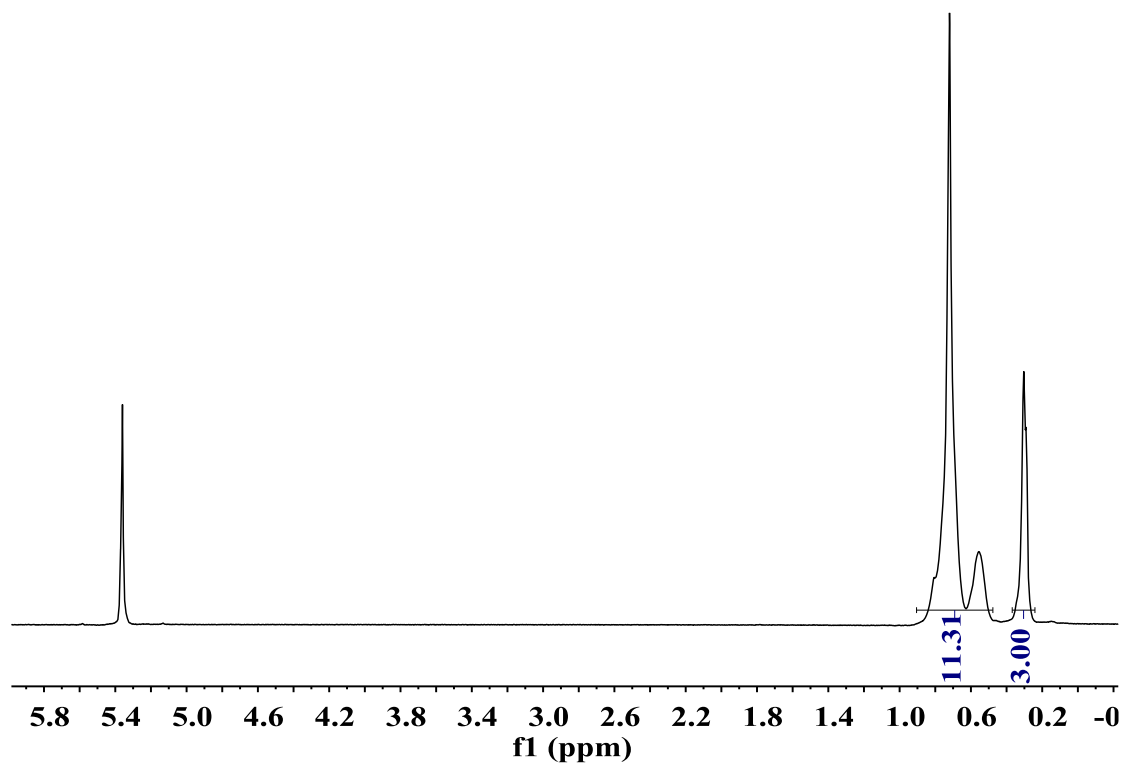

**Figure S57.**  $^1\text{H}$  NMR spectrum (400 MHz,  $\text{C}_2\text{D}_2\text{Cl}_4$ , 110  $^\circ\text{C}$ ) of the polyethylene generated by **Cat3** from table 1, entry 30.

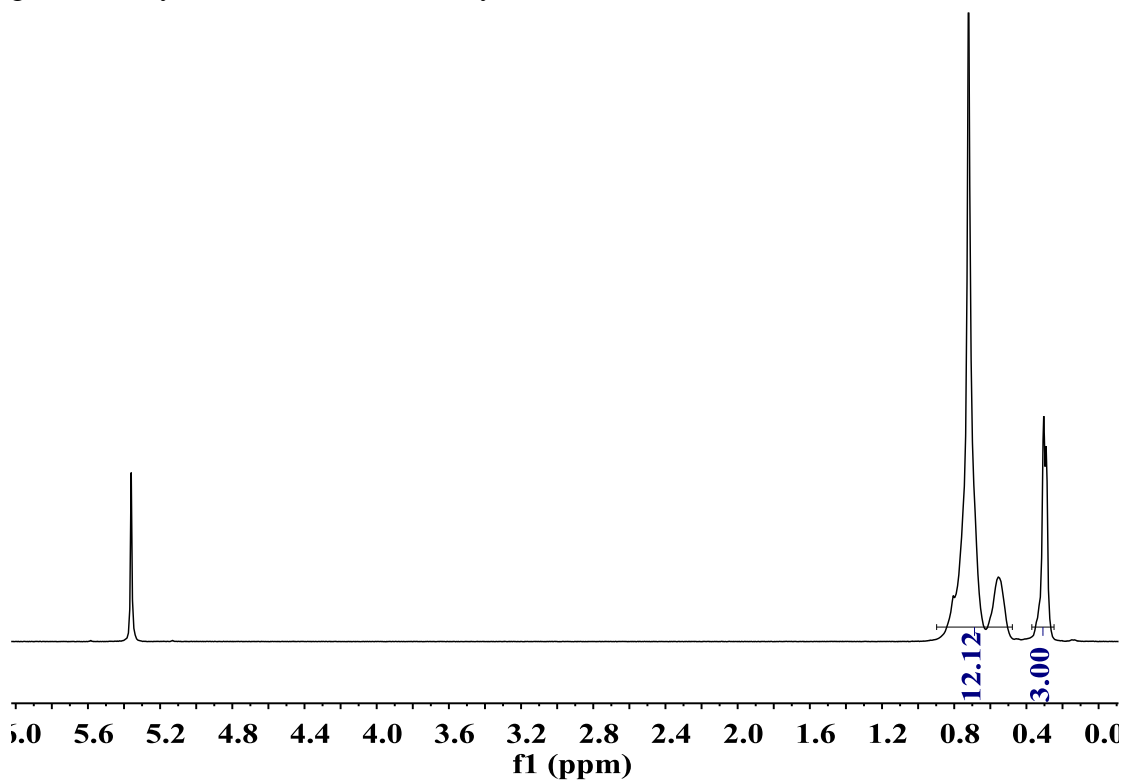

**Figure S58.**  $^1\text{H}$  NMR spectrum (400 MHz,  $\text{C}_2\text{D}_2\text{Cl}_4$ , 110  $^\circ\text{C}$ ) of the polyethylene generated by **Cat3** from table 1, entry 31.

$$X_M = \frac{\frac{I_{MeO}}{\frac{I_1+I_2}{4} + \frac{I_{MeO}}{3}}}{3} * 100\% = \frac{1}{1639.87} = 0.06\%$$

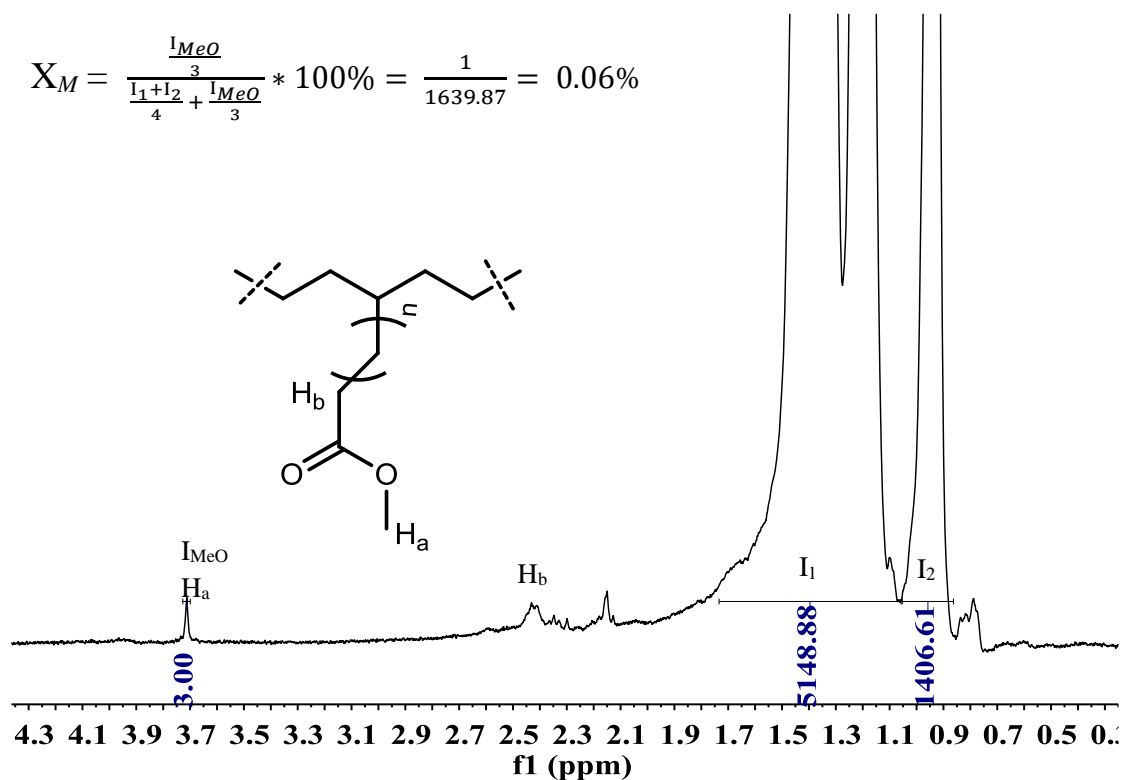

**Figure S59.** <sup>1</sup>H NMR spectrum (400 MHz, C<sub>2</sub>D<sub>2</sub>Cl<sub>4</sub>, 110 °C) of the E-UA copolymer generated by **Cat1** from table 2, entry 1.

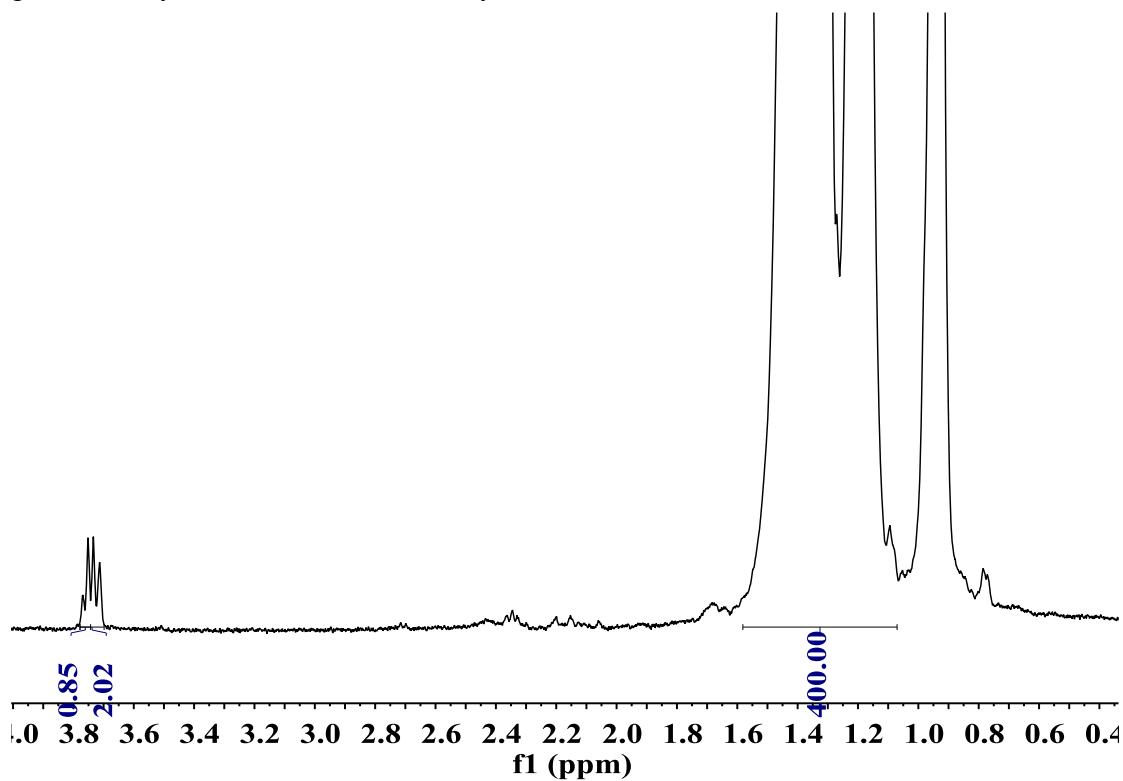

**Figure S60.** <sup>1</sup>H NMR spectrum (400 MHz, C<sub>2</sub>D<sub>2</sub>Cl<sub>4</sub>, 110 °C) of the E-UA copolymer generated by **Cat2** from table 2, entry 2.

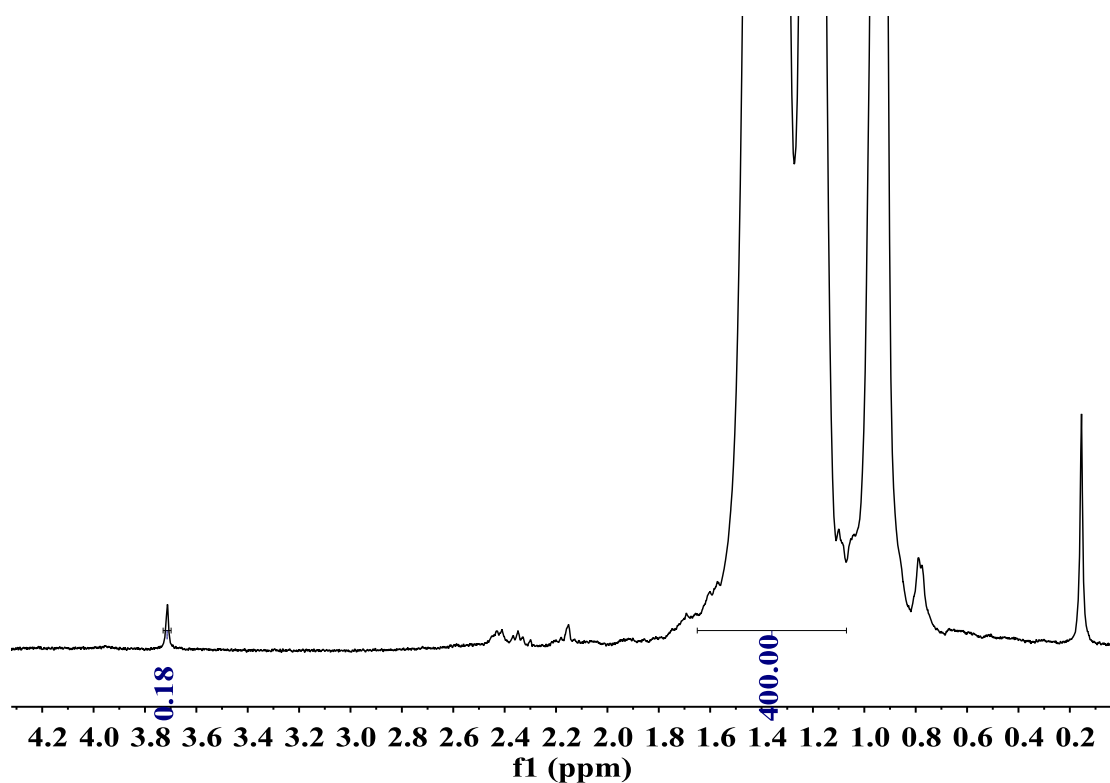

**Figure S61.**  $^1\text{H}$  NMR spectrum (400 MHz,  $\text{C}_2\text{D}_2\text{Cl}_4$ , 110  $^\circ\text{C}$ ) of the E-UA copolymer generated by **Cat3** from table 2, entry 3.

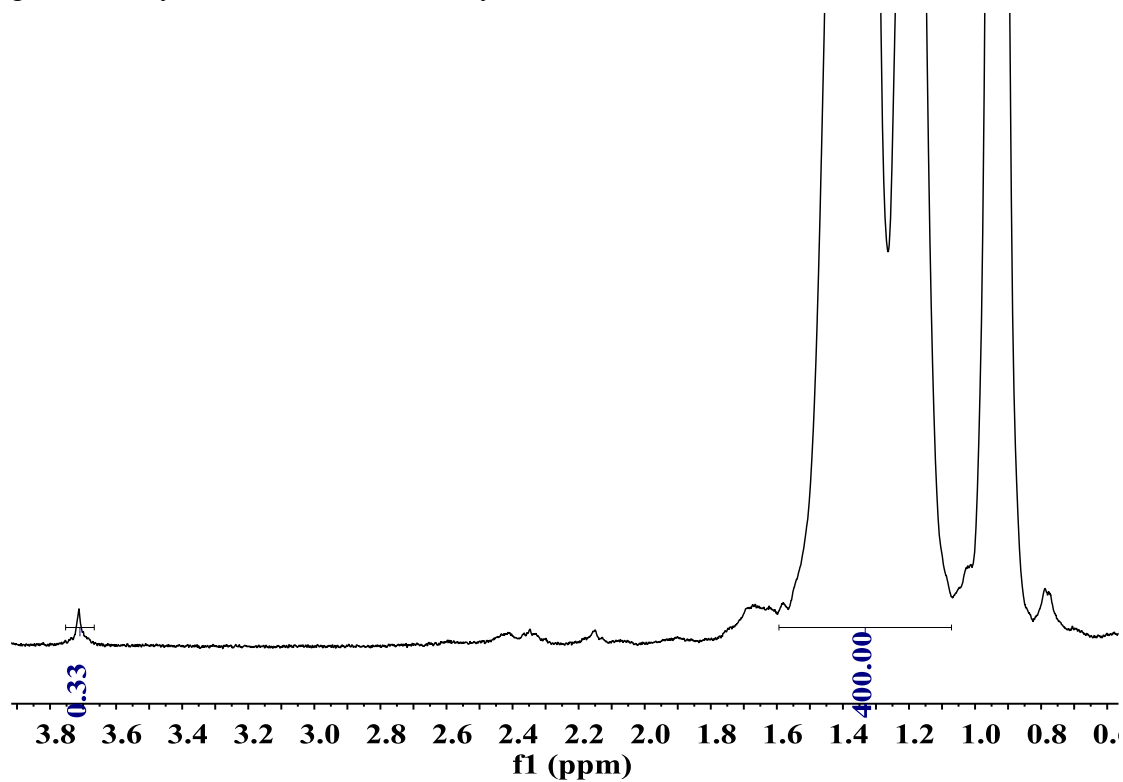

**Figure S62.**  $^1\text{H}$  NMR spectrum (400 MHz,  $\text{C}_2\text{D}_2\text{Cl}_4$ , 110  $^\circ\text{C}$ ) of the E-UA copolymer generated by **Cat4** from table 2, entry 4.

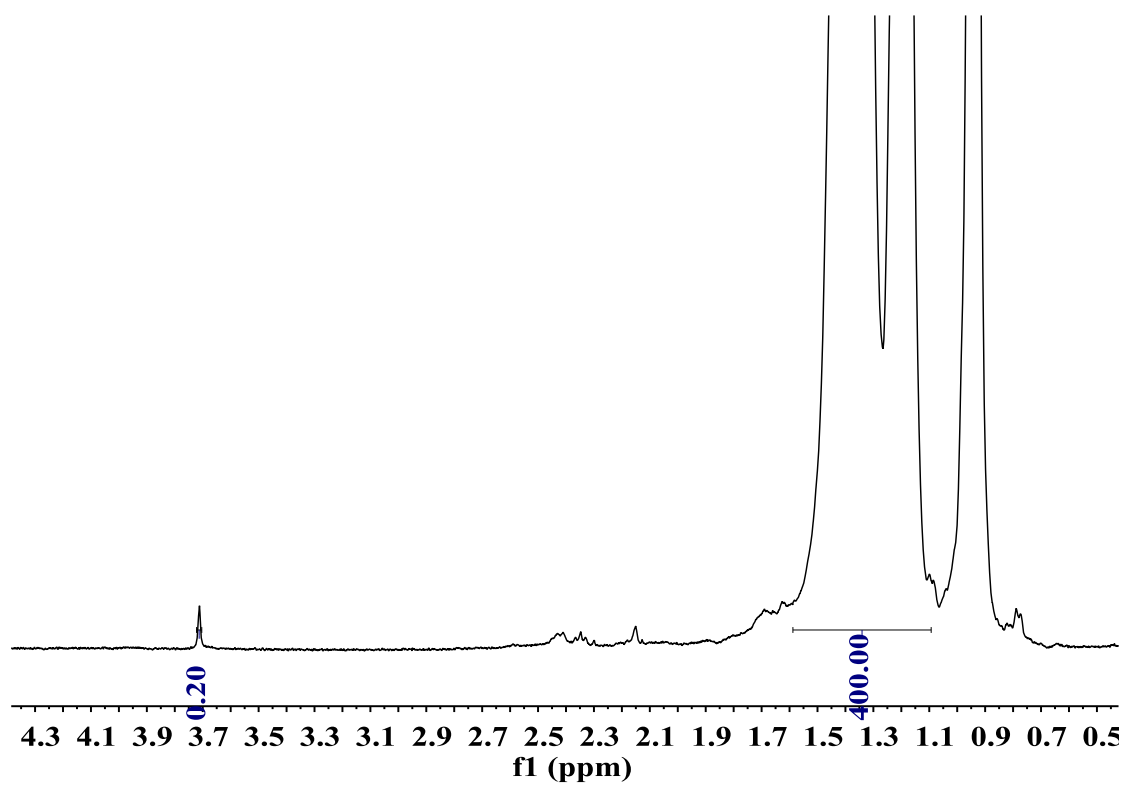

**Figure S63.** <sup>1</sup>H NMR spectrum (400 MHz, C<sub>2</sub>D<sub>2</sub>Cl<sub>4</sub>, 110 °C) of the E-UA copolymer generated by **Cat1** from table 2, entry 6.

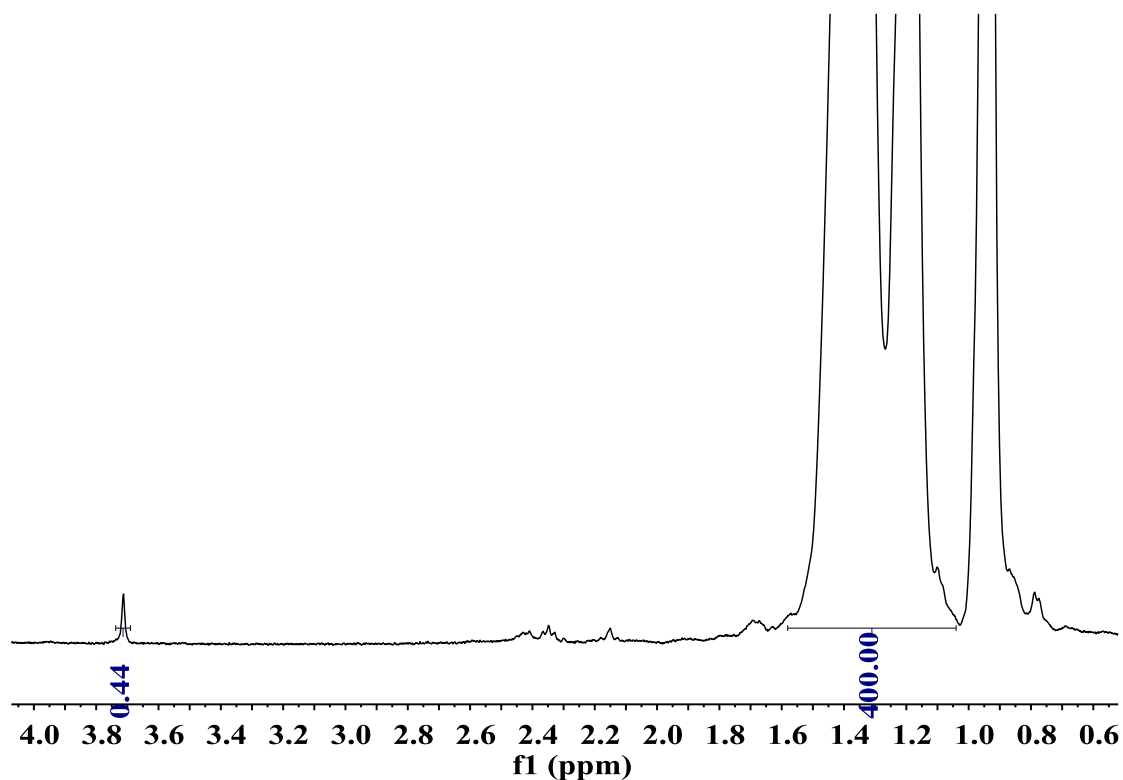

**Figure S64.**  $^1\text{H}$  NMR spectrum (400 MHz,  $\text{C}_2\text{D}_2\text{Cl}_4$ , 110  $^\circ\text{C}$ ) of the E-UA copolymer generated by **Cat4** from table 2, entry 7.

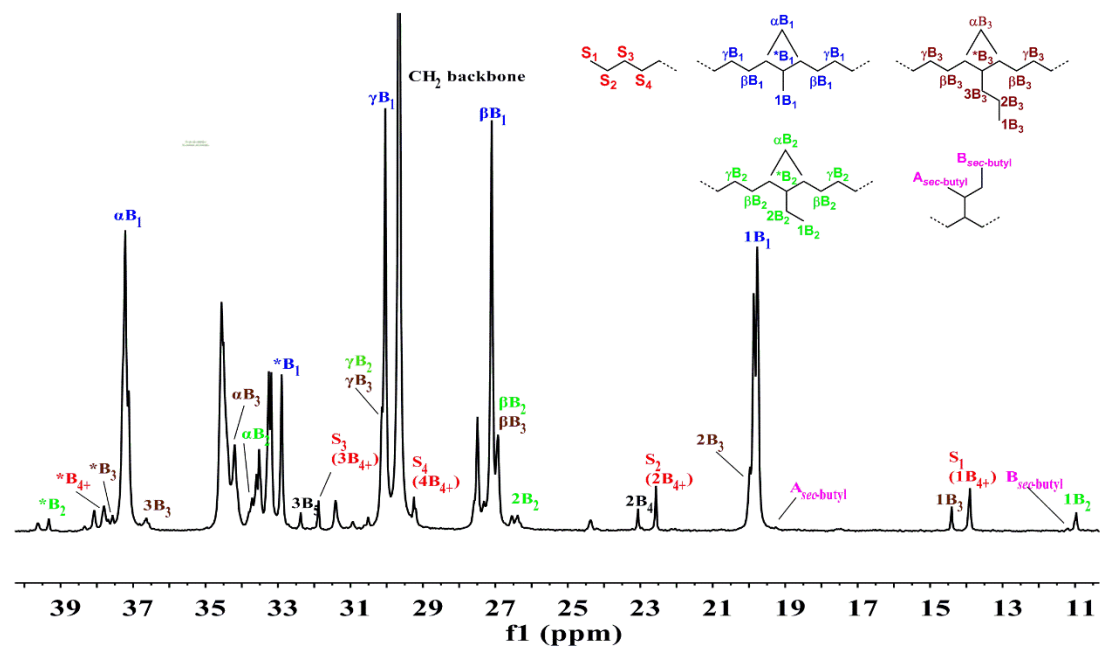

**Figure S65.**  $^{13}\text{C}$  NMR spectrum (400 MHz,  $\text{C}_2\text{D}_2\text{Cl}_4$ , 110  $^\circ\text{C}$ ) of the polyethylene generated by complex **Cat2** from table 1, entry 8.

**Table S1.** Polyethylene Branching Distribution based on  $^{13}\text{C}$  NMR analysis.<sup>a</sup>

| polymer       | methyl | ethyl | propyl | butyl+ | Branching density (/1000C) <sup>b</sup> |
|---------------|--------|-------|--------|--------|-----------------------------------------|
| <b>PE</b>     | 110.30 | 7.20  | 3.68   | 0.82   | 122                                     |
| <b>PE (%)</b> | 90.41  | 5.90  | 3.02   | 0.67   | 122                                     |

<sup>a</sup> Sample from Table 1, entry 12 (**PE**). <sup>b</sup> Measured by  $^{13}\text{C}$  NMR in  $\text{C}_2\text{D}_2\text{Cl}_4$  at 110 °C.

## 6 GPC of polymer and copolymer

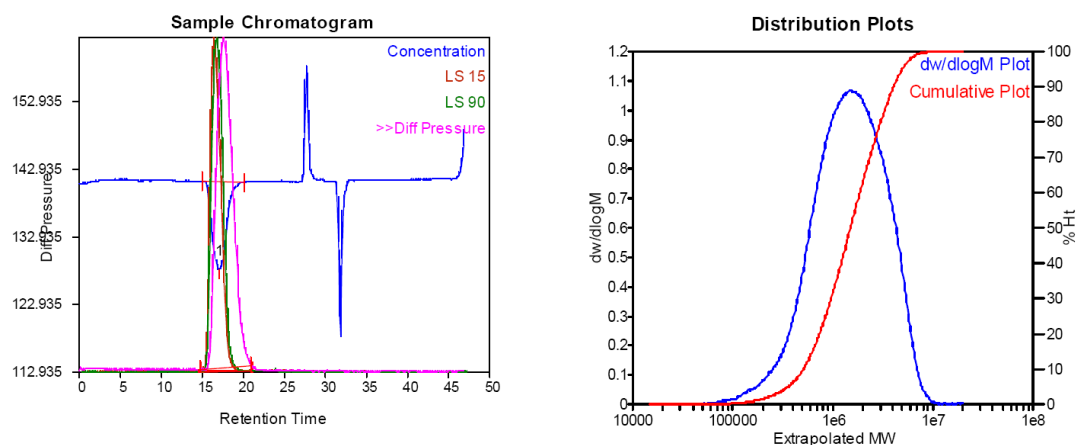

### MW Averages

| Peak No | Mp      | Mn     | Mw      | Mz      | Mz+1    | Mv      | PD      |
|---------|---------|--------|---------|---------|---------|---------|---------|
| 1       | 1533176 | 992676 | 1933023 | 3103372 | 4371930 | 1015959 | 1.94729 |

### Processed Peaks

| Peak No | Name          | Start RT (mins) | Max RT (mins) | End RT (mins) | Pk Height (mV) | % Height | Area (mV.secs) | % Area |
|---------|---------------|-----------------|---------------|---------------|----------------|----------|----------------|--------|
| 1       | Concentration | 14.98           | 16.98         | 20.20         | -9.48569       | 0        | 1106.49        | 100    |
| 2       | LS 15         | 14.80           | 16.32         | 21.17         | 118.593        | 0        | 11928.7        | 100    |
| 3       | LS 90         | 14.68           | 16.70         | 20.97         | 229.64         | 0        | 24633.1        | 100    |
| 4       | Diff Pressure | 14.70           | 17.50         | 20.97         | 48.8867        | 0        | 6893.88        | 100    |

**Figure S66.** GPC trace of the polymer from table 1, entry 1.

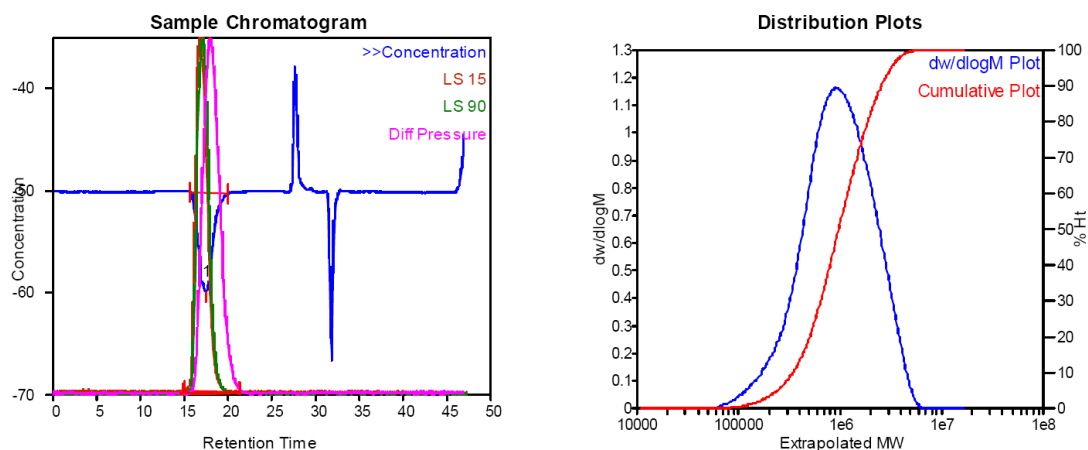

### MW Averages

| Peak No | Mp     | Mn     | Mw      | Mz      | Mz+1    | Mv     | PD      |
|---------|--------|--------|---------|---------|---------|--------|---------|
| 1       | 905961 | 675297 | 1230639 | 1922996 | 2605611 | 699756 | 1.82237 |

### Processed Peaks

| Peak No | Name          | Start RT (mins) | Max RT (mins) | End RT (mins) | Pk Height (mV) | % Height | Area (mV.secs) | % Area |
|---------|---------------|-----------------|---------------|---------------|----------------|----------|----------------|--------|
| 1       | Concentration | 15.65           | 17.45         | 19.97         | -9.67278       | 0        | 1049.09        | 100    |
| 2       | LS 15         | 15.02           | 16.77         | 21.18         | 79.2771        | 0        | 8040.03        | 100    |
| 3       | LS 90         | 14.80           | 17.05         | 21.18         | 208.649        | 0        | 21276.3        | 100    |
| 4       | Diff Pressure | 14.92           | 17.88         | 21.48         | 34.821         | 0        | 4808.87        | 100    |

**Figure S67.** GPC trace of the polymer from table 1, entry 2.

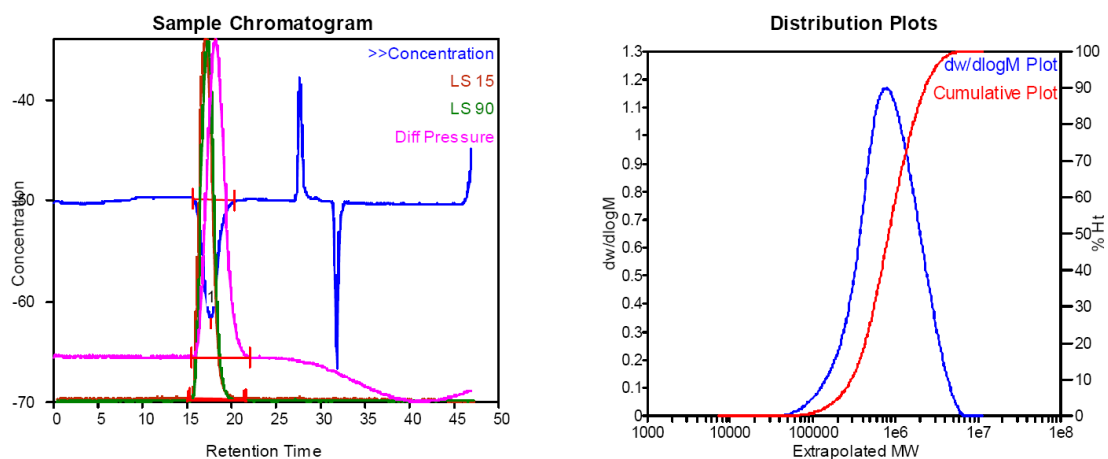

#### MW Averages

| Peak No | Mp     | Mn     | Mw      | Mz      | Mz+1    | Mv     | PD      |
|---------|--------|--------|---------|---------|---------|--------|---------|
| 1       | 780068 | 579516 | 1095206 | 1812753 | 2596406 | 628286 | 1.88986 |

#### Processed Peaks

| Peak No | Name          | Start RT (mins) | Max RT (mins) | End RT (mins) | Pk Height (mV) | % Height | Area (mV.secs) | % Area |
|---------|---------------|-----------------|---------------|---------------|----------------|----------|----------------|--------|
| 1       | Concentration | 15.63           | 17.65         | 20.32         | -11.7561       | 0        | 1292.86        | 100    |
| 2       | LS 15         | 15.25           | 17.02         | 21.58         | 80.9045        | 0        | 8842.87        | 100    |
| 3       | LS 90         | 15.17           | 17.28         | 21.35         | 235.651        | 0        | 24701.1        | 100    |
| 4       | Diff Pressure | 15.47           | 18.08         | 22.02         | 37.0882        | 0        | 5240.29        | 100    |

**Figure S68.** GPC trace of the polymer from table 1, entry 3.

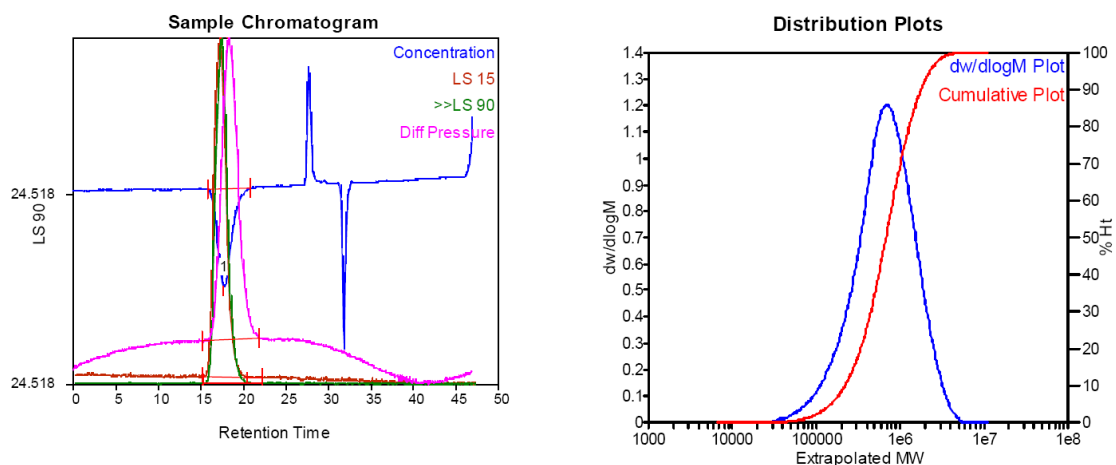

### MW Averages

| Peak No | Mp     | Mn     | Mw     | Mz      | Mz+1    | Mv     | PD      |
|---------|--------|--------|--------|---------|---------|--------|---------|
| 1       | 712894 | 443218 | 864047 | 1409937 | 2015264 | 490085 | 1.94949 |

### Processed Peaks

| Peak No | Name          | Start RT (mins) | Max RT (mins) | End RT (mins) | Pk Height (mV) | % Height | Area (mV.secs) | % Area |
|---------|---------------|-----------------|---------------|---------------|----------------|----------|----------------|--------|
| 1       | Concentration | 15.77           | 17.72         | 20.77         | -9.814         | 0        | 1068.91        | 100    |
| 2       | LS 15         | 15.20           | 17.20         | 22.13         | 57.2247        | 0        | 5891.2         | 100    |
| 3       | LS 90         | 15.35           | 17.38         | 20.43         | 181.684        | 0        | 18088.7        | 100    |
| 4       | Diff Pressure | 15.13           | 18.18         | 21.88         | 25.45          | 0        | 3512.42        | 100    |

**Figure S69.** GPC trace of the polymer from table 1, entry 4.

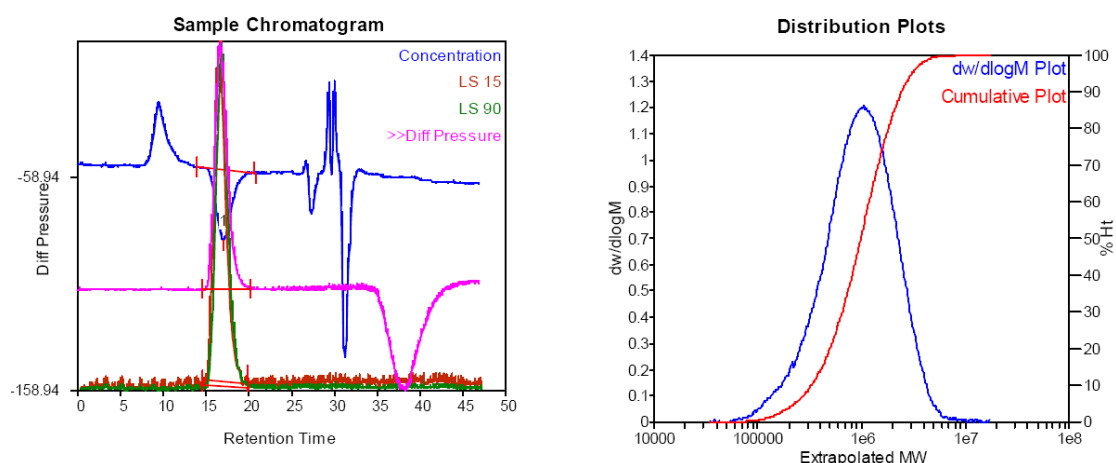

### MW Averages

| Peak No | Mp      | Mn     | Mw      | Mz      | Mz+1    | Mv      | PD      |
|---------|---------|--------|---------|---------|---------|---------|---------|
| 1       | 1047796 | 657571 | 1229702 | 2061804 | 3509360 | 1096838 | 1.87007 |

### Processed Peaks

| Peak No | Name          | Start RT (mins) | Max RT (mins) | End RT (mins) | Pk Height (mV) | % Height | Area (mV.secs) | % Area |
|---------|---------------|-----------------|---------------|---------------|----------------|----------|----------------|--------|
| 1       | Concentration | 13.97           | 16.98         | 20.68         | -4.03286       | 0        | 500.473        | 100    |
| 2       | LS 15         | 14.53           | 16.52         | 19.77         | 32.1946        | 0        | 3463.11        | 100    |
| 3       | LS 90         | 14.47           | 16.80         | 19.93         | 82.6558        | 0        | 8815.64        | 100    |
| 4       | Diff Pressure | 14.48           | 16.62         | 20.22         | 116.586        | 0        | 12875.5        | 100    |

**Figure S70.** GPC trace of the polymer from table 1, entry 5.

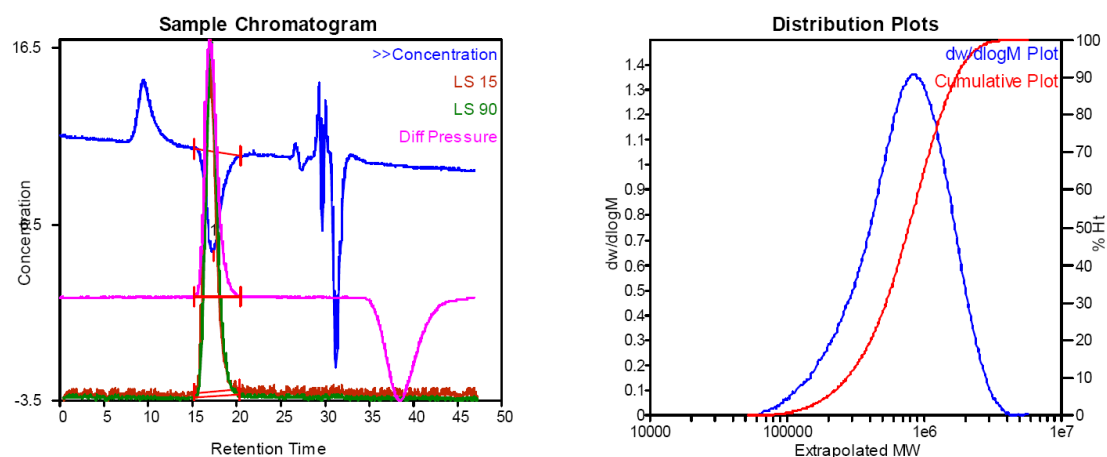

#### MW Averages

| Peak No | Mp     | Mn     | Mw     | Mz      | Mz+1    | Mv     | PD      |
|---------|--------|--------|--------|---------|---------|--------|---------|
| 1       | 859907 | 544055 | 896740 | 1286110 | 1679968 | 828425 | 1.64825 |

#### Processed Peaks

| Peak No | Name          | Start RT (mins) | Max RT (mins) | End RT (mins) | Pk Height (mV) | % Height | Area (mV.secs) | % Area |
|---------|---------------|-----------------|---------------|---------------|----------------|----------|----------------|--------|
| 1       | Concentration | 15.22           | 17.32         | 20.42         | -5.65098       | 0        | 655.369        | 100    |
| 2       | LS 15         | 15.13           | 16.85         | 20.28         | 37.0034        | 0        | 3625.17        | 100    |
| 3       | LS 90         | 15.18           | 17.07         | 20.32         | 111.44         | 0        | 10993.9        | 100    |
| 4       | Diff Pressure | 15.08           | 17.00         | 20.47         | 123.961        | 0        | 12741.4        | 100    |

**Figure S71.** GPC trace of the polymer from table 1, entry 6.

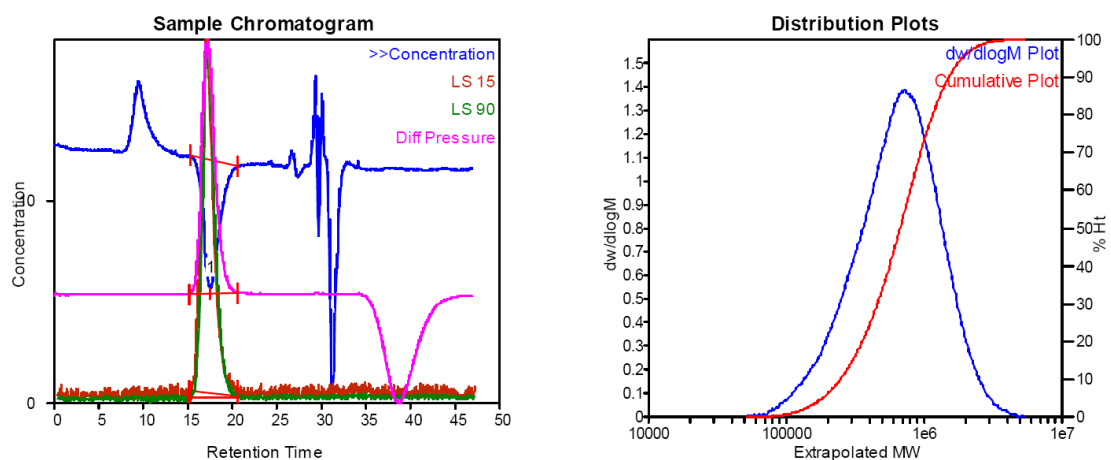

### MW Averages

| Peak No | Mp     | Mn     | Mw     | Mz      | Mz+1    | Mv     | PD      |
|---------|--------|--------|--------|---------|---------|--------|---------|
| 1       | 722381 | 487259 | 795527 | 1184519 | 1643906 | 731565 | 1.63266 |

### Processed Peaks

| Peak No | Name          | Start RT (mins) | Max RT (mins) | End RT (mins) | Pk Height (mV) | % Height | Area (mV.secs) | % Area |
|---------|---------------|-----------------|---------------|---------------|----------------|----------|----------------|--------|
| 1       | Concentration | 15.25           | 17.52         | 20.67         | -6.35247       | 0        | 756.338        | 100    |
| 2       | LS 15         | 15.18           | 17.07         | 20.62         | 31.4845        | 0        | 3350.99        | 100    |
| 3       | LS 90         | 15.17           | 17.23         | 20.65         | 102.777        | 0        | 10660.1        | 100    |
| 4       | Diff Pressure | 15.12           | 17.23         | 20.65         | 115.904        | 0        | 12530.2        | 100    |

**Figure S72.** GPC trace of the polymer from table 1, entry 7.

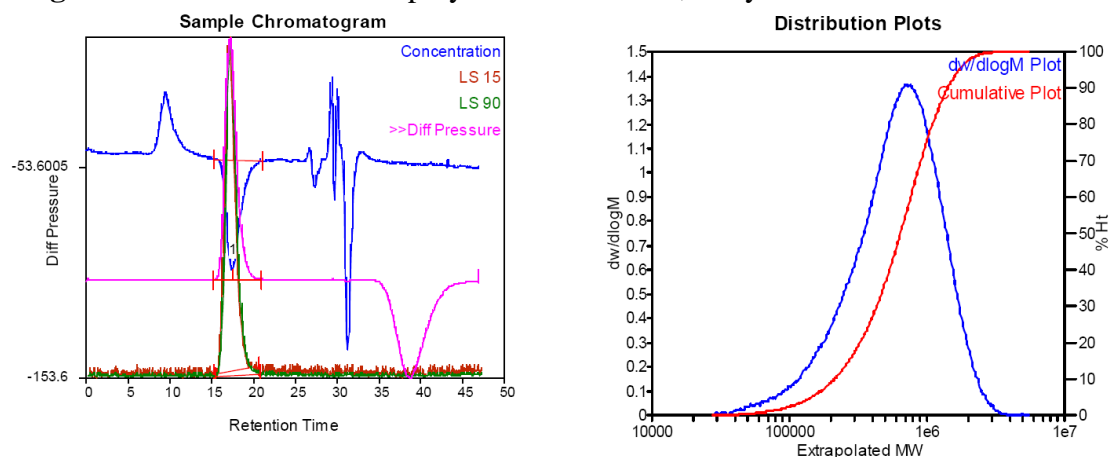

### MW Averages

| Peak No | Mp     | Mn     | Mw     | Mz      | Mz+1    | Mv     | PD      |
|---------|--------|--------|--------|---------|---------|--------|---------|
| 1       | 704928 | 417852 | 740636 | 1072711 | 1403874 | 686296 | 1.77248 |

### Processed Peaks

| Peak No | Name          | Start RT (mins) | Max RT (mins) | End RT (mins) | Pk Height (mV) | % Height | Area (mV.secs) | % Area |
|---------|---------------|-----------------|---------------|---------------|----------------|----------|----------------|--------|
| 1       | Concentration | 15.28           | 17.48         | 21.08         | -6.26736       | 0        | 704.603        | 100    |
| 2       | LS 15         | 15.30           | 17.15         | 20.55         | 34.328         | 0        | 3289.92        | 100    |
| 3       | LS 90         | 15.40           | 17.20         | 20.72         | 112.869        | 0        | 10980.2        | 100    |
| 4       | Diff Pressure | 15.22           | 17.20         | 20.87         | 115.583        | 0        | 11688.5        | 100    |

**Figure S73.** GPC trace of the polymer from table 1, entry 8.

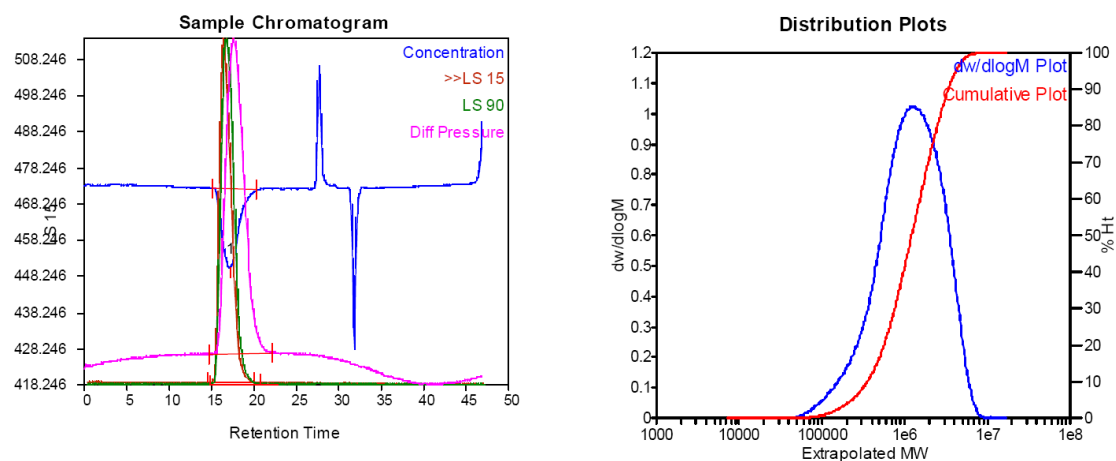

### MW Averages

| Peak No | Mp      | Mn     | Mw      | Mz      | Mz+1    | Mv     | PD     |
|---------|---------|--------|---------|---------|---------|--------|--------|
| 1       | 1264265 | 735031 | 1580464 | 2584437 | 3528619 | 872496 | 2.1502 |

### Processed Peaks

| Peak No | Name          | Start RT<br>(mins) | Max RT<br>(mins) | End RT<br>(mins) | Pk Height<br>(mV) | % Height | Area<br>(mV.secs) | % Area |
|---------|---------------|--------------------|------------------|------------------|-------------------|----------|-------------------|--------|
| 1       | Concentration | 15.12              | 17.12            | 20.32            | -7.97139          | 0        | 1053.58           | 100    |
| 2       | LS 15         | 14.57              | 16.27            | 20.07            | 95.2609           | 0        | 9954.65           | 100    |
| 3       | LS 90         | 14.85              | 16.73            | 20.72            | 190.81            | 0        | 21855.9           | 100    |
| 4       | Diff Pressure | 14.70              | 17.55            | 22.17            | 40.6225           | 0        | 6091.65           | 100    |

**Figure S74.** GPC trace of the polymer from table 1, entry 9.

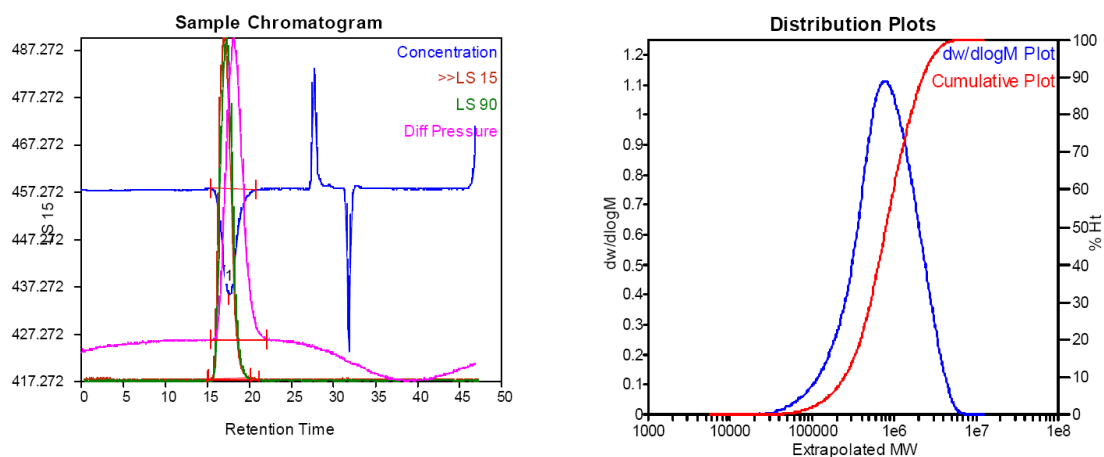

### MW Averages

| Peak No | Mp     | Mn     | Mw      | Mz      | Mz+1    | Mv     | PD      |
|---------|--------|--------|---------|---------|---------|--------|---------|
| 1       | 812933 | 497771 | 1050713 | 1776223 | 2549139 | 560008 | 2.11084 |

### Processed Peaks

| Peak No | Name          | Start RT (mins) | Max RT (mins) | End RT (mins) | Pk Height (mV) | % Height | Area (mV.secs) | % Area |
|---------|---------------|-----------------|---------------|---------------|----------------|----------|----------------|--------|
| 1       | Concentration | 15.37           | 17.55         | 20.78         | -10.267        | 0        | 1164.76        | 100    |
| 2       | LS 15         | 15.10           | 16.97         | 20.18         | 71.8635        | 0        | 7572.22        | 100    |
| 3       | LS 90         | 15.07           | 17.20         | 21.02         | 206.12         | 0        | 21322.8        | 100    |
| 4       | Diff Pressure | 15.37           | 18.02         | 22.07         | 32.9618        | 0        | 4606.48        | 100    |

**Figure S75.** GPC trace of the polymer from table 1, entry 10.

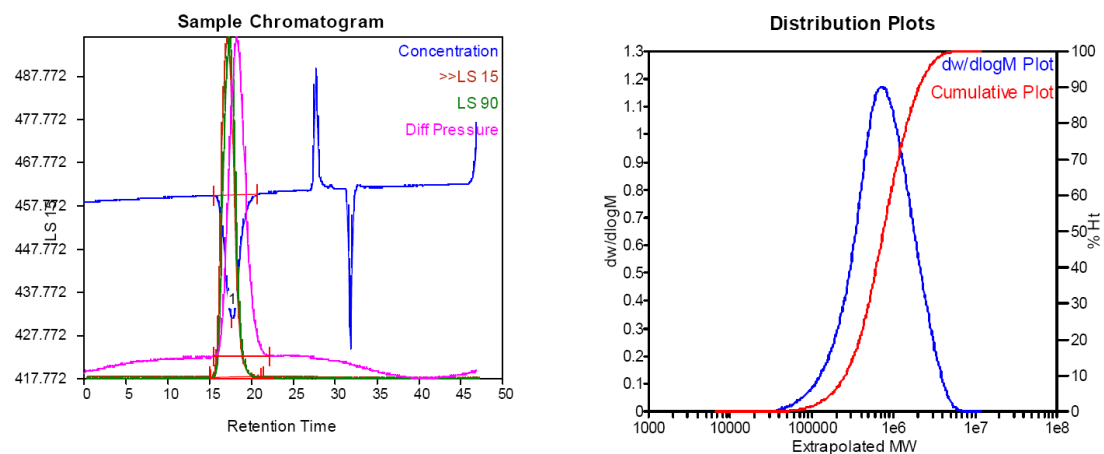

### MW Averages

| Peak No | Mp     | Mn     | Mw     | Mz      | Mz+1    | Mv     | PD      |
|---------|--------|--------|--------|---------|---------|--------|---------|
| 1       | 726355 | 506040 | 986805 | 1653362 | 2425350 | 556423 | 1.95005 |

### Processed Peaks

| Peak No | Name          | Start RT (mins) | Max RT (mins) | End RT (mins) | Pk Height (mV) | % Height | Area (mV.secs) | % Area |
|---------|---------------|-----------------|---------------|---------------|----------------|----------|----------------|--------|
| 1       | Concentration | 15.48           | 17.70         | 20.65         | -12.3528       | 0        | 1396.15        | 100    |
| 2       | LS 15         | 15.03           | 17.08         | 21.48         | 78.6071        | 0        | 8599.28        | 100    |
| 3       | LS 90         | 15.08           | 17.33         | 21.08         | 234.491        | 0        | 24595          | 100    |
| 4       | Diff Pressure | 15.43           | 18.15         | 22.20         | 39.1669        | 0        | 5516.39        | 100    |

**Figure S76.** GPC trace of the polymer from table 1, entry 11.

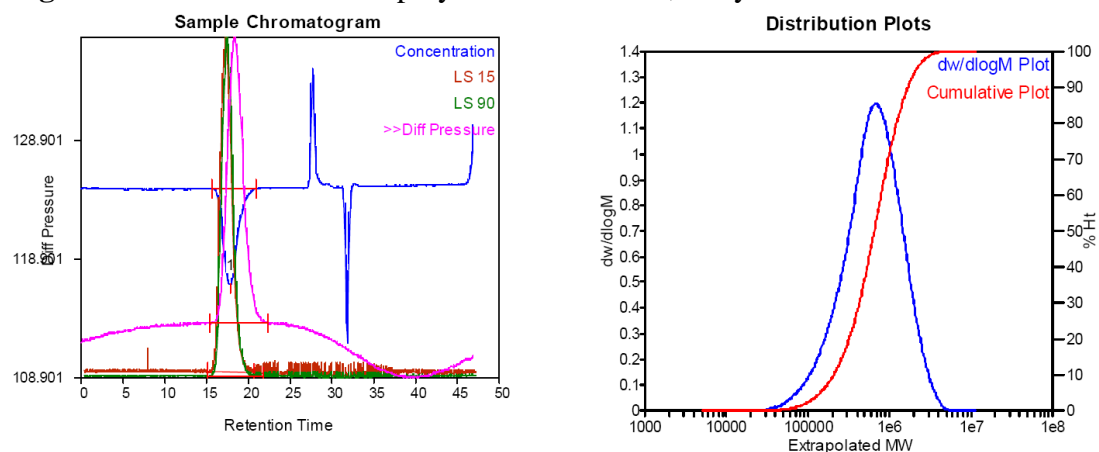

### MW Averages

| Peak No | Mp     | Mn     | Mw     | Mz      | Mz+1    | Mv     | PD      |
|---------|--------|--------|--------|---------|---------|--------|---------|
| 1       | 696448 | 424259 | 822492 | 1335748 | 1903889 | 473604 | 1.93866 |

### Processed Peaks

| Peak No | Name          | Start RT (mins) | Max RT (mins) | End RT (mins) | Pk Height (mV) | % Height | Area (mV.secs) | % Area |
|---------|---------------|-----------------|---------------|---------------|----------------|----------|----------------|--------|
| 1       | Concentration | 15.70           | 17.75         | 20.87         | -9.51279       | 0        | 1041.42        | 100    |
| 2       | LS 15         | 15.23           | 17.27         | 20.58         | 53.7693        | 0        | 5476.59        | 100    |
| 3       | LS 90         | 15.08           | 17.40         | 21.68         | 174.63         | 0        | 17270.3        | 100    |
| 4       | Diff Pressure | 15.37           | 18.27         | 22.40         | 24.1233        | 0        | 3306.67        | 100    |

**Figure S77.** GPC trace of the polymer from table 1, entry 12.

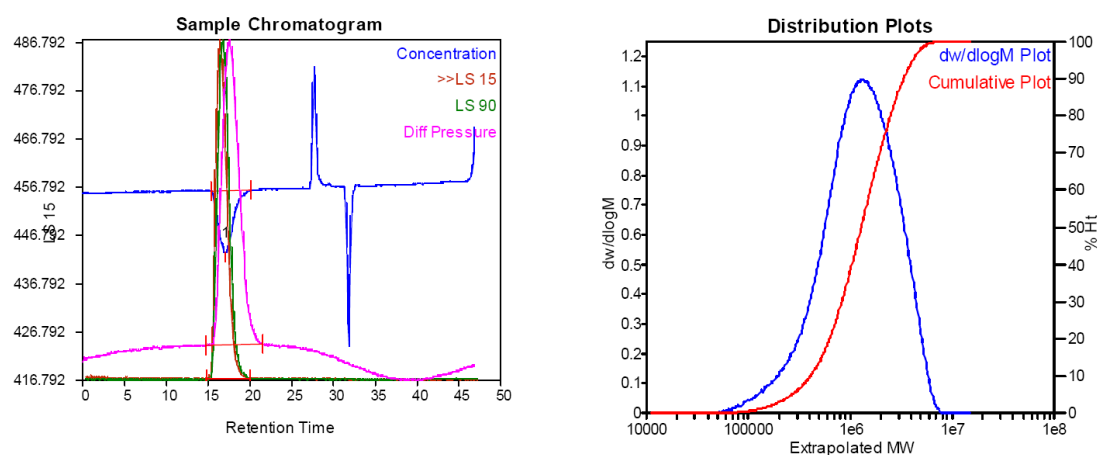

### MW Averages

| Peak No | Mp      | Mn     | Mw      | Mz      | Mz+1    | Mv     | PD      |
|---------|---------|--------|---------|---------|---------|--------|---------|
| 1       | 1332937 | 810272 | 1604170 | 2500587 | 3320325 | 898697 | 1.97979 |

### Processed Peaks

| Peak No | Name          | Start RT (mins) | Max RT (mins) | End RT (mins) | Pk Height (mV) | % Height | Area (mV.secs) | % Area |
|---------|---------------|-----------------|---------------|---------------|----------------|----------|----------------|--------|
| 1       | Concentration | 15.25           | 17.02         | 20.10         | -6.22418       | 0        | 737.735        | 100    |
| 2       | LS 15         | 14.83           | 16.38         | 19.95         | 70.3809        | 0        | 7177.61        | 100    |
| 3       | LS 90         | 14.80           | 16.73         | 20.02         | 147.36         | 0        | 15567.4        | 100    |
| 4       | Diff Pressure | 14.68           | 17.48         | 21.62         | 31.2932        | 0        | 4490.51        | 100    |

**Figure S78.** GPC trace of the polymer from table 1, entry 13.

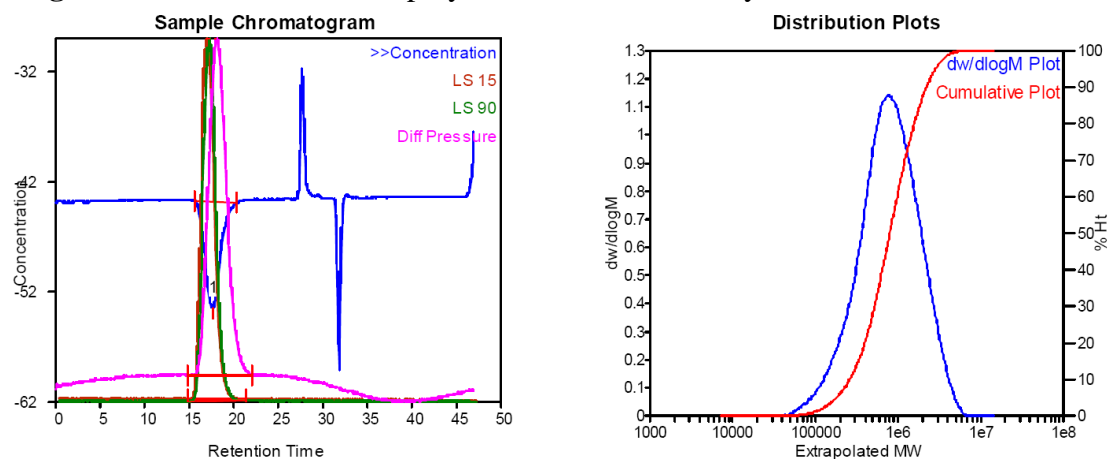

### MW Averages

| Peak No | Mp     | Mn     | Mw      | Mz      | Mz+1    | Mv     | PD      |
|---------|--------|--------|---------|---------|---------|--------|---------|
| 1       | 758012 | 534637 | 1047546 | 1753950 | 2518736 | 608514 | 1.95936 |

### Processed Peaks

| Peak No | Name          | Start RT (mins) | Max RT (mins) | End RT (mins) | Pk Height (mV) | % Height | Area (mV.secs) | % Area |
|---------|---------------|-----------------|---------------|---------------|----------------|----------|----------------|--------|
| 1       | Concentration | 15.58           | 17.63         | 20.33         | -9.63041       | 0        | 1086.12        | 100    |
| 2       | LS 15         | 14.90           | 16.98         | 21.45         | 64.555         | 0        | 7094.56        | 100    |
| 3       | LS 90         | 14.90           | 17.25         | 21.45         | 187.979        | 0        | 19809.6        | 100    |
| 4       | Diff Pressure | 14.90           | 18.03         | 21.98         | 33.4221        | 0        | 4766.13        | 100    |

**Figure S79.** GPC trace of the polymer from table 1, entry 14.

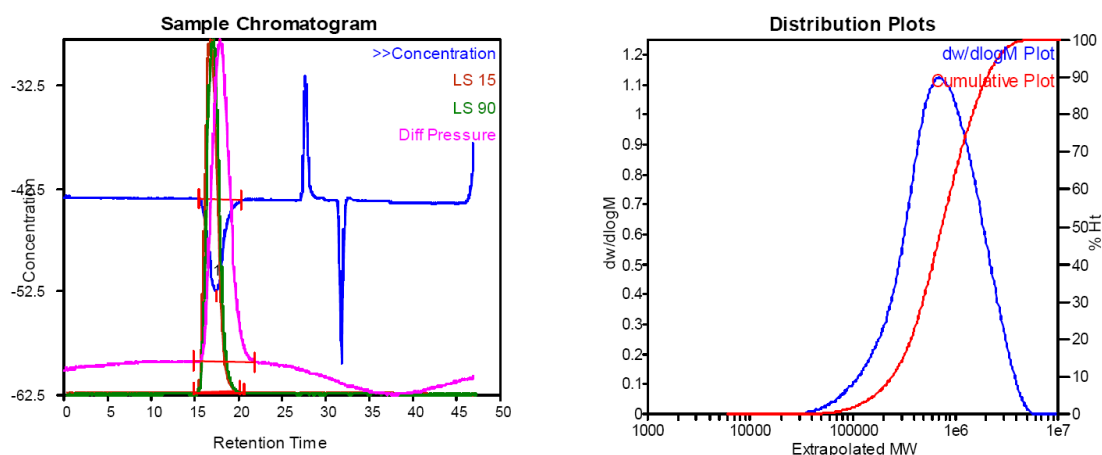

### MW Averages

| Peak No | Mp     | Mn     | Mw     | Mz      | Mz+1    | Mv     | PD      |
|---------|--------|--------|--------|---------|---------|--------|---------|
| 1       | 688601 | 484372 | 964158 | 1586855 | 2226207 | 539170 | 1.99053 |

### Processed Peaks

| Peak No | Name          | Start RT (mins) | Max RT (mins) | End RT (mins) | Pk Height (mV) | % Height | Area (mV.secs) | % Area |
|---------|---------------|-----------------|---------------|---------------|----------------|----------|----------------|--------|
| 1       | Concentration | 15.47           | 17.43         | 20.25         | -8.86025       | 0        | 1013.69        | 100    |
| 2       | LS 15         | 14.90           | 16.72         | 20.18         | 75.2042        | 0        | 8037.24        | 100    |
| 3       | LS 90         | 14.90           | 17.03         | 20.65         | 193.927        | 0        | 20493          | 100    |
| 4       | Diff Pressure | 14.90           | 17.80         | 21.83         | 34.4328        | 0        | 4894.19        | 100    |

**Figure S80.** GPC trace of the polymer from table 1, entry 15.

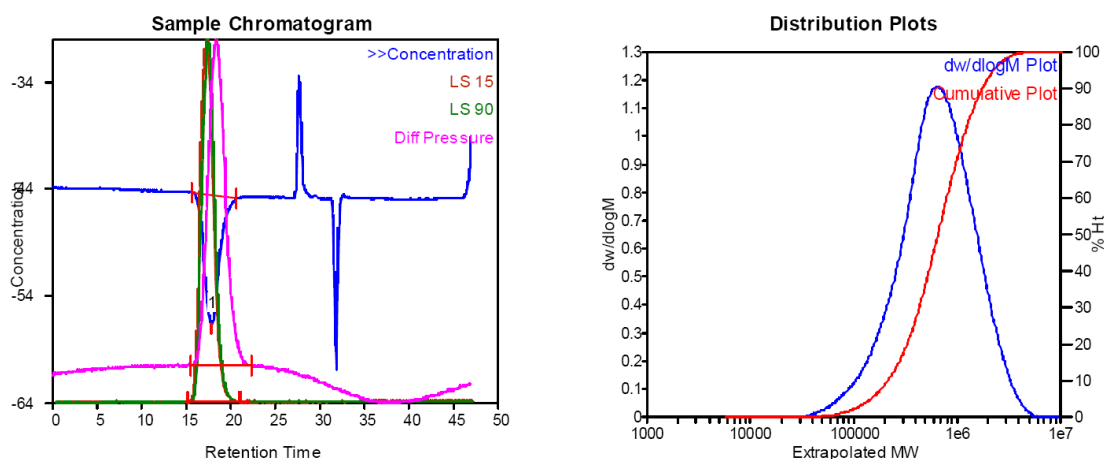

### MW Averages

| Peak No | Mp     | Mn     | Mw     | Mz      | Mz+1    | Mv     | PD     |
|---------|--------|--------|--------|---------|---------|--------|--------|
| 1       | 646795 | 434748 | 847977 | 1415490 | 2061625 | 491804 | 1.9505 |

### Processed Peaks

| Peak No | Name          | Start RT (mins) | Max RT (mins) | End RT (mins) | Pk Height (mV) | % Height | Area (mV.secs) | % Area |
|---------|---------------|-----------------|---------------|---------------|----------------|----------|----------------|--------|
| 1       | Concentration | 15.65           | 17.83         | 20.63         | -12.0737       | 0        | 1345.46        | 100    |
| 2       | LS 15         | 15.22           | 17.23         | 20.98         | 67.7809        | 0        | 7266.09        | 100    |
| 3       | LS 90         | 15.22           | 17.43         | 21.07         | 217.955        | 0        | 22417.5        | 100    |
| 4       | Diff Pressure | 15.40           | 18.25         | 22.28         | 33.1447        | 0        | 4598.53        | 100    |

**Figure S81.** GPC trace of the polymer from table 1, entry 16.

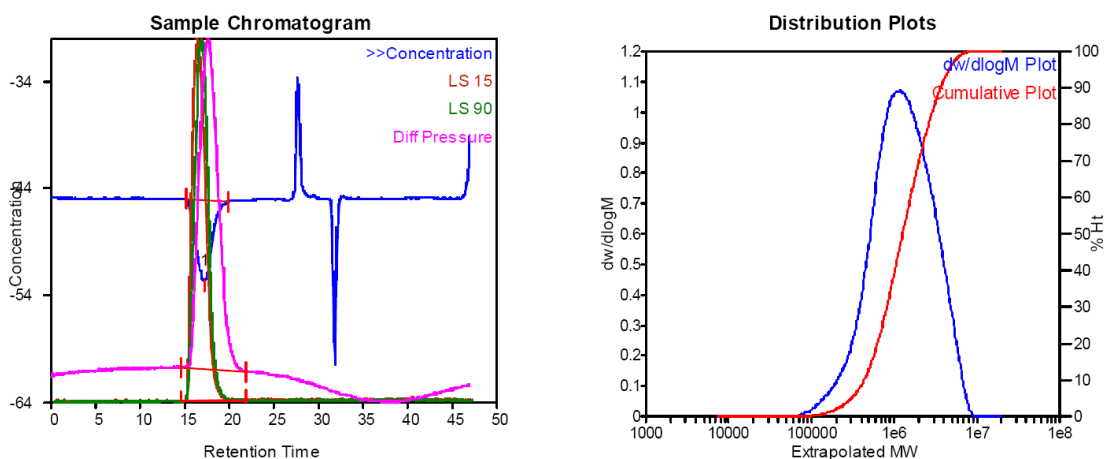

### MW Averages

| Peak No | Mp      | Mn     | Mw      | Mz      | Mz+1    | Mv     | PD      |
|---------|---------|--------|---------|---------|---------|--------|---------|
| 1       | 1210550 | 867304 | 1693281 | 2796020 | 3870631 | 983708 | 1.95235 |

### Processed Peaks

| Peak No | Name          | Start RT (mins) | Max RT (mins) | End RT (mins) | Pk Height (mV) | % Height | Area (mV.secs) | % Area |
|---------|---------------|-----------------|---------------|---------------|----------------|----------|----------------|--------|
| 1       | Concentration | 15.18           | 17.23         | 19.85         | -7.5026        | 0        | 921.854        | 100    |
| 2       | LS 15         | 14.50           | 16.30         | 21.95         | 80.3263        | 0        | 9200.93        | 100    |
| 3       | LS 90         | 14.50           | 16.83         | 21.95         | 169.901        | 0        | 19501.4        | 100    |
| 4       | Diff Pressure | 14.50           | 17.50         | 21.95         | 40.9258        | 0        | 6059.75        | 100    |

**Figure S82.** GPC trace of the polymer from table 1, entry 17.

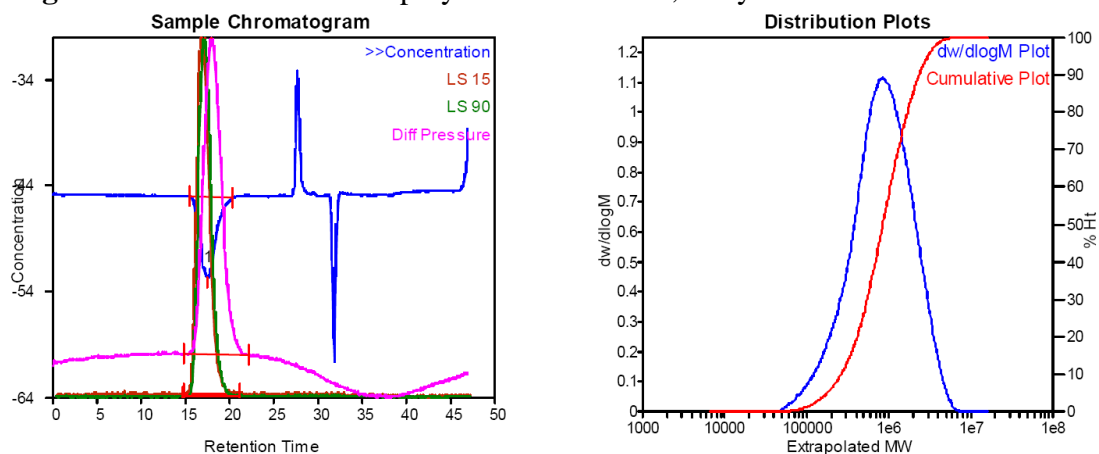

### MW Averages

| Peak No | Mp     | Mn     | Mw      | Mz      | Mz+1    | Mv     | PD      |
|---------|--------|--------|---------|---------|---------|--------|---------|
| 1       | 865318 | 549209 | 1110692 | 1856301 | 2635990 | 634654 | 2.02235 |

### Processed Peaks

| Peak No | Name          | Start RT (mins) | Max RT (mins) | End RT (mins) | Pk Height (mV) | % Height | Area (mV.secs) | % Area |
|---------|---------------|-----------------|---------------|---------------|----------------|----------|----------------|--------|
| 1       | Concentration | 15.45           | 17.48         | 20.30         | -7.61723       | 0        | 900.075        | 100    |
| 2       | LS 15         | 14.87           | 16.80         | 21.12         | 56.5156        | 0        | 6138.84        | 100    |
| 3       | LS 90         | 14.68           | 17.12         | 21.13         | 155.568        | 0        | 16594.9        | 100    |
| 4       | Diff Pressure | 14.88           | 17.90         | 22.13         | 27.9894        | 0        | 4004.66        | 100    |

**Figure S83.** GPC trace of the polymer from table 1, entry 18.

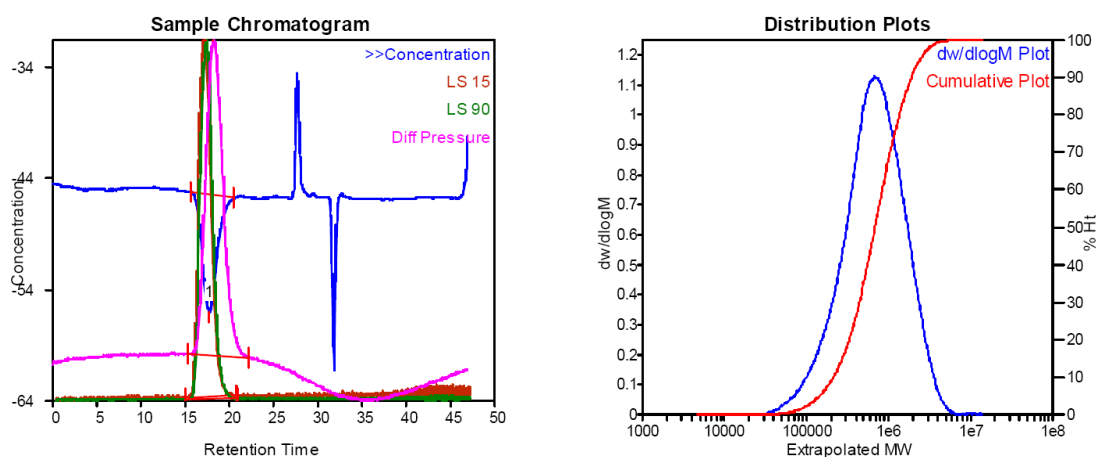

### MW Averages

| Peak No | Mp     | Mn     | Mw     | Mz      | Mz+1    | Mv     | PD      |
|---------|--------|--------|--------|---------|---------|--------|---------|
| 1       | 685938 | 439988 | 906523 | 1605457 | 2681506 | 502420 | 2.06034 |

### Processed Peaks

| Peak No | Name          | Start RT (mins) | Max RT (mins) | End RT (mins) | Pk Height (mV) | % Height | Area (mV.secs) | % Area |
|---------|---------------|-----------------|---------------|---------------|----------------|----------|----------------|--------|
| 1       | Concentration | 15.62           | 17.72         | 20.48         | -10.5474       | 0        | 1172.9         | 100    |
| 2       | LS 15         | 14.98           | 17.10         | 20.85         | 63.8642        | 0        | 6624.04        | 100    |
| 3       | LS 90         | 15.05           | 17.33         | 20.90         | 197.028        | 0        | 19927          | 100    |
| 4       | Diff Pressure | 15.27           | 18.13         | 22.23         | 31.3179        | 0        | 4299.74        | 100    |

**Figure S84.** GPC trace of the polymer from table 1, entry 19.

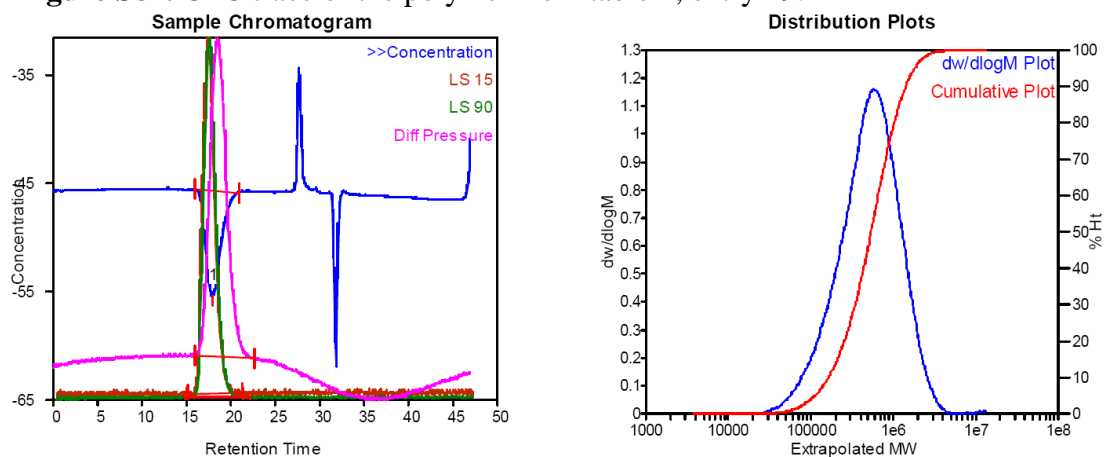

### MW Averages

| Peak No | Mp     | Mn     | Mw     | Mz      | Mz+1    | Mv     | PD      |
|---------|--------|--------|--------|---------|---------|--------|---------|
| 1       | 581939 | 343318 | 699090 | 1349272 | 3347177 | 389568 | 2.03628 |

### Processed Peaks

| Peak No | Name          | Start RT (mins) | Max RT (mins) | End RT (mins) | Pk Height (mV) | % Height | Area (mV.secs) | % Area |
|---------|---------------|-----------------|---------------|---------------|----------------|----------|----------------|--------|
| 1       | Concentration | 15.87           | 17.92         | 20.87         | -9.77539       | 0        | 1072.56        | 100    |
| 2       | LS 15         | 15.23           | 17.42         | 21.23         | 47.552         | 0        | 4661.98        | 100    |
| 3       | LS 90         | 15.03           | 17.55         | 21.48         | 164.154        | 0        | 15762.7        | 100    |
| 4       | Diff Pressure | 15.87           | 18.33         | 22.58         | 22.6773        | 0        | 3040.45        | 100    |

**Figure S85.** GPC trace of the polymer from table 1, entry 20.

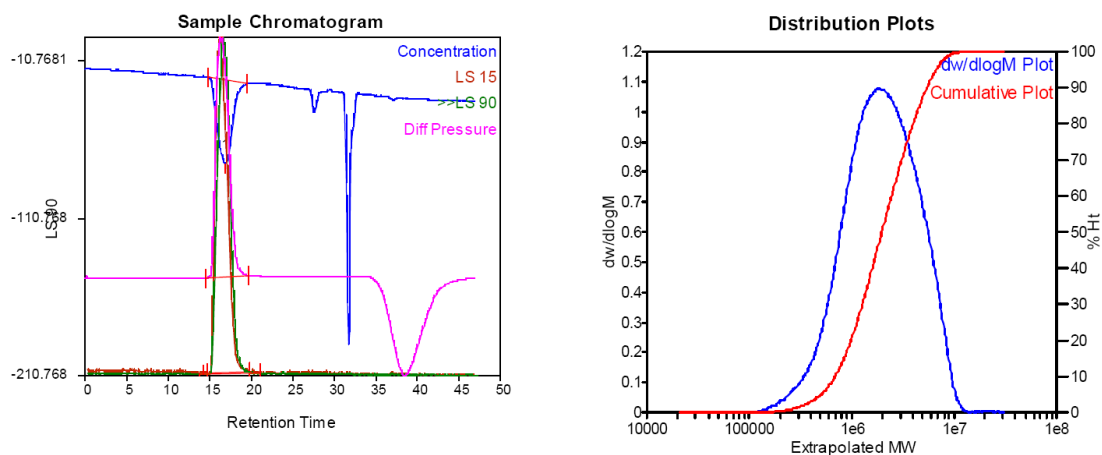

### MW Averages

| Peak No | Mp      | Mn      | Mw      | Mz      | Mz+1    | Mv      | PD      |
|---------|---------|---------|---------|---------|---------|---------|---------|
| 1       | 1866650 | 1379094 | 2573156 | 4181044 | 6102837 | 2263752 | 1.86583 |

### Processed Peaks

| Peak No | Name          | Start RT (mins) | Max RT (mins) | End RT (mins) | Pk Height (mV) | % Height | Area (mV.secs) | % Area |
|---------|---------------|-----------------|---------------|---------------|----------------|----------|----------------|--------|
| 1       | Concentration | 14.88           | 16.83         | 19.50         | -8.55815       | 0        | 1040.99        | 100    |
| 2       | LS 15         | 14.72           | 16.10         | 19.83         | 116.176        | 0        | 12747.1        | 100    |
| 3       | LS 90         | 14.18           | 16.62         | 21.10         | 214.151        | 0        | 24344.7        | 100    |
| 4       | Diff Pressure | 14.58           | 16.35         | 19.70         | 347.933        | 0        | 38973.1        | 100    |

**Figure S86.** GPC trace of the polymer from table 1, entry 21.

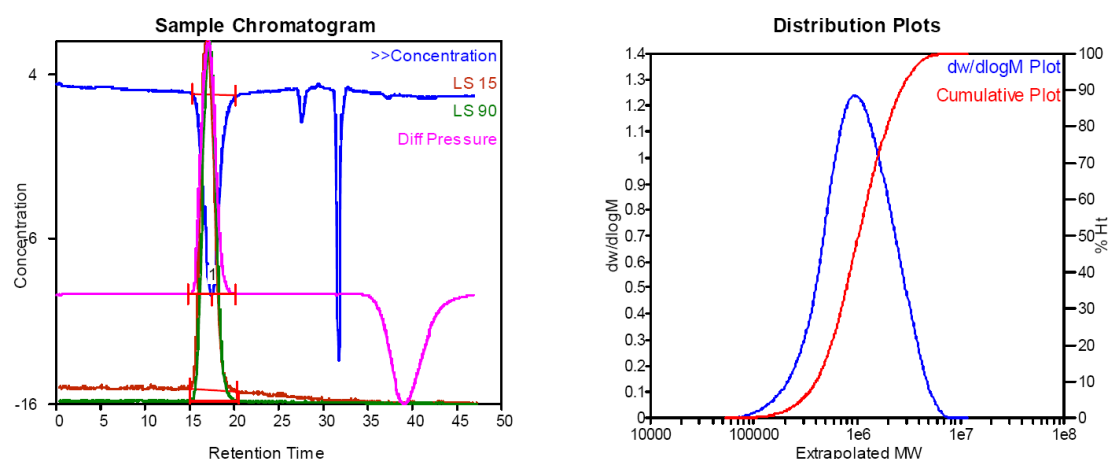

### MW Averages

| Peak No | Mp     | Mn     | Mw      | Mz      | Mz+1    | Mv      | PD      |
|---------|--------|--------|---------|---------|---------|---------|---------|
| 1       | 953050 | 765320 | 1314491 | 2055340 | 2862604 | 1203508 | 1.71757 |

### Processed Peaks

| Peak No | Name          | Start RT (mins) | Max RT (mins) | End RT (mins) | Pk Height (mV) | % Height | Area (mV.secs) | % Area |
|---------|---------------|-----------------|---------------|---------------|----------------|----------|----------------|--------|
| 1       | Concentration | 15.30           | 17.47         | 20.20         | -12.1883       | 0        | 1421.42        | 100    |
| 2       | LS 15         | 14.98           | 16.83         | 20.25         | 92.9761        | 0        | 10775.8        | 100    |
| 3       | LS 90         | 14.95           | 17.20         | 20.48         | 254.651        | 0        | 28144.7        | 100    |
| 4       | Diff Pressure | 14.83           | 17.07         | 20.12         | 306.731        | 0        | 34989.2        | 100    |

**Figure S87.** GPC trace of the polymer from table 1, entry 22.

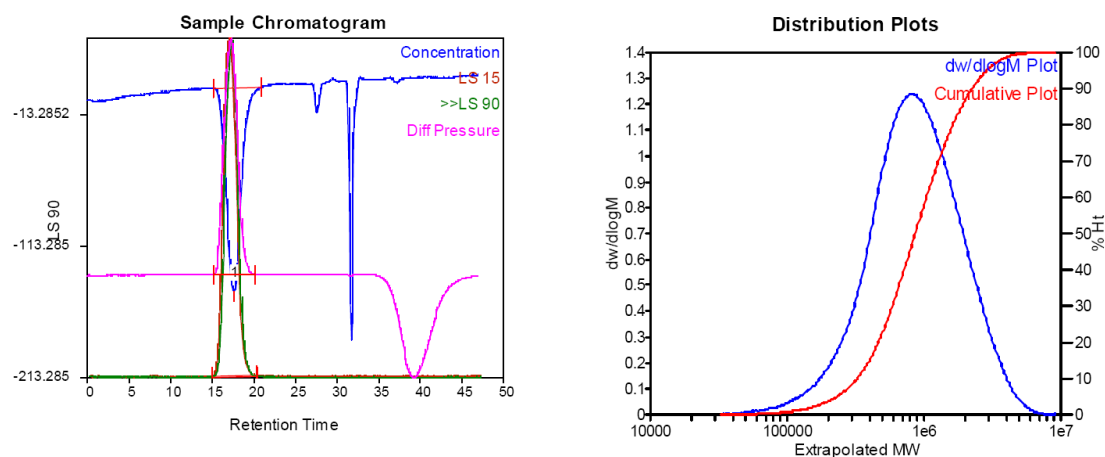

### MW Averages

| Peak No | Mp     | Mn     | Mw      | Mz      | Mz+1    | Mv      | PD      |
|---------|--------|--------|---------|---------|---------|---------|---------|
| 1       | 805052 | 612511 | 1107246 | 1780035 | 2574853 | 1009036 | 1.80772 |

### Processed Peaks

| Peak No | Name          | Start RT (mins) | Max RT (mins) | End RT (mins) | Pk Height (mV) | % Height | Area (mV.secs) | % Area |
|---------|---------------|-----------------|---------------|---------------|----------------|----------|----------------|--------|
| 1       | Concentration | 15.23           | 17.60         | 20.98         | -13.2125       | 0        | 1544.51        | 100    |
| 2       | LS 15         | 15.07           | 17.05         | 20.25         | 87.1337        | 0        | 10089.6        | 100    |
| 3       | LS 90         | 15.07           | 17.28         | 20.47         | 258.185        | 0        | 28354.8        | 100    |
| 4       | Diff Pressure | 15.13           | 17.20         | 20.17         | 289.068        | 0        | 32878.7        | 100    |

**Figure S88.** GPC trace of the polymer from table 1, entry 23.

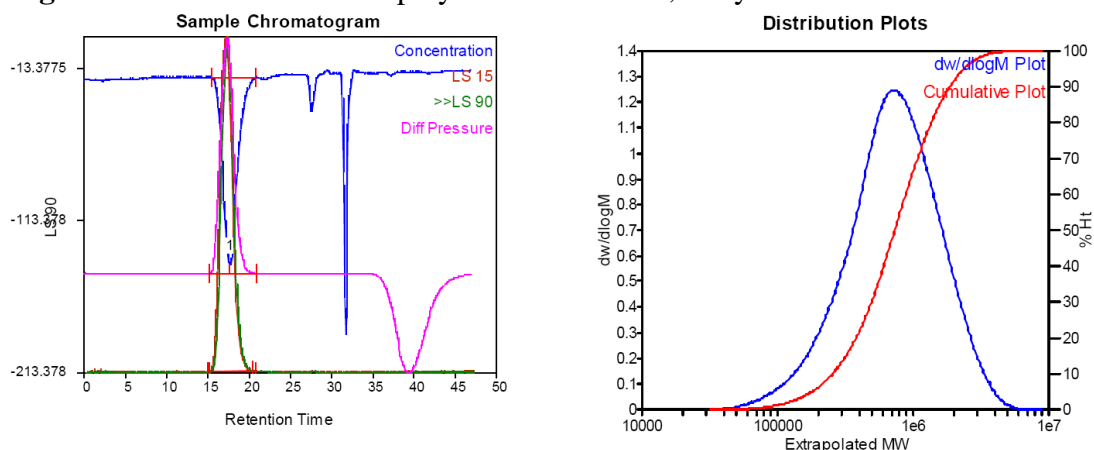

### MW Averages

| Peak No | Mp     | Mn     | Mw     | Mz      | Mz+1    | Mv     | PD      |
|---------|--------|--------|--------|---------|---------|--------|---------|
| 1       | 726171 | 505865 | 922307 | 1469354 | 2086880 | 849549 | 1.82323 |

### Processed Peaks

| Peak No | Name          | Start RT (mins) | Max RT (mins) | End RT (mins) | Pk Height (mV) | % Height | Area (mV.secs) | % Area |
|---------|---------------|-----------------|---------------|---------------|----------------|----------|----------------|--------|
| 1       | Concentration | 15.48           | 17.67         | 20.73         | -11.9364       | 0        | 1368.15        | 100    |
| 2       | LS 15         | 15.07           | 17.17         | 20.52         | 69.901         | 0        | 7709.43        | 100    |
| 3       | LS 90         | 15.12           | 17.35         | 20.72         | 220.284        | 0        | 23187.8        | 100    |
| 4       | Diff Pressure | 15.10           | 17.30         | 20.90         | 234.066        | 0        | 25820.1        | 100    |

**Figure S89.** GPC trace of the polymer from table 1, entry 24.

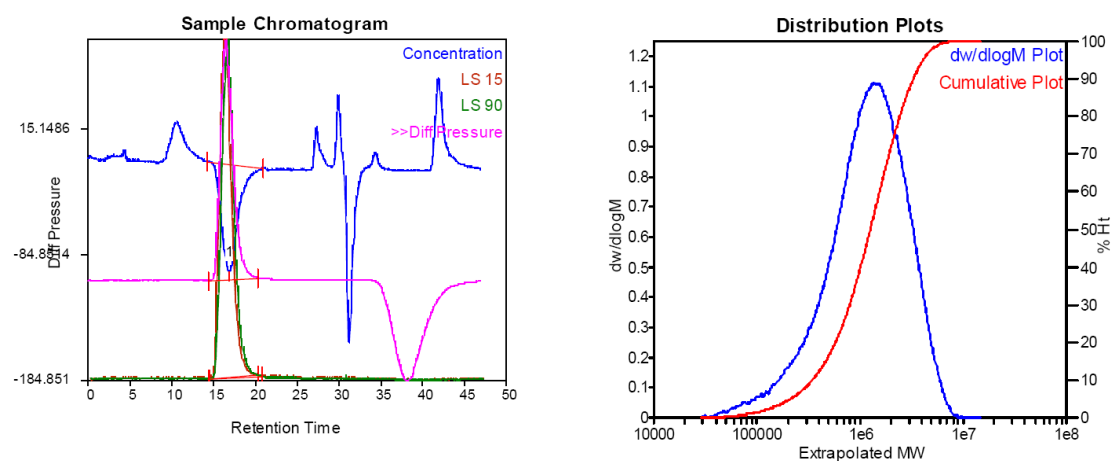

### MW Averages

| Peak No | Mp      | Mn     | Mw      | Mz      | Mz+1    | Mv      | PD      |
|---------|---------|--------|---------|---------|---------|---------|---------|
| 1       | 1397583 | 689608 | 1577423 | 2548461 | 3473192 | 1384059 | 2.28742 |

### Processed Peaks

| Peak No | Name          | Start RT (mins) | Max RT (mins) | End RT (mins) | Pk Height (mV) | % Height | Area (mV.secs) | % Area |
|---------|---------------|-----------------|---------------|---------------|----------------|----------|----------------|--------|
| 1       | Concentration | 14.28           | 16.80         | 20.95         | -5.69956       | 0        | 757.936        | 100    |
| 2       | LS 15         | 14.57           | 16.25         | 20.32         | 58.3614        | 0        | 6383.45        | 100    |
| 3       | LS 90         | 14.43           | 16.60         | 20.72         | 130.136        | 0        | 14542.6        | 100    |
| 4       | Diff Pressure | 14.37           | 16.45         | 20.37         | 191.205        | 0        | 21487.6        | 100    |

**Figure S90.** GPC trace of the polymer from table 1, entry 25.

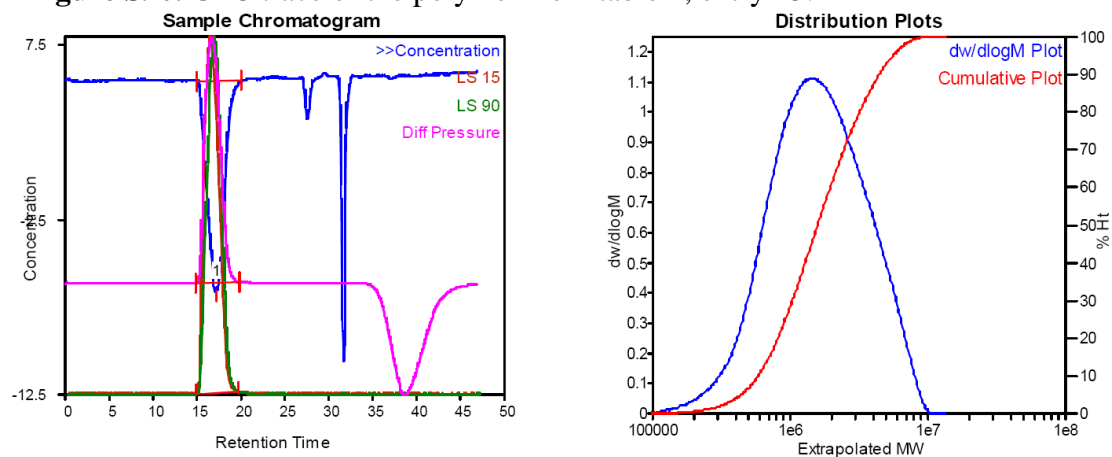

### MW Averages

| Peak No | Mp      | Mn      | Mw      | Mz      | Mz+1    | Mv      | PD      |
|---------|---------|---------|---------|---------|---------|---------|---------|
| 1       | 1436268 | 1149317 | 2081404 | 3340612 | 4571949 | 1850493 | 1.81099 |

### Processed Peaks

| Peak No | Name          | Start RT (mins) | Max RT (mins) | End RT (mins) | Pk Height (mV) | % Height | Area (mV.secs) | % Area |
|---------|---------------|-----------------|---------------|---------------|----------------|----------|----------------|--------|
| 1       | Concentration | 15.07           | 17.18         | 20.03         | -12.0781       | 0        | 1573.84        | 100    |
| 2       | LS 15         | 14.85           | 16.45         | 19.63         | 132.692        | 0        | 16666.3        | 100    |
| 3       | LS 90         | 14.88           | 16.92         | 19.70         | 285.335        | 0        | 34802.9        | 100    |
| 4       | Diff Pressure | 14.83           | 16.68         | 19.78         | 427.535        | 0        | 53138.8        | 100    |

**Figure S91.** GPC trace of the polymer from table 1, entry 26.

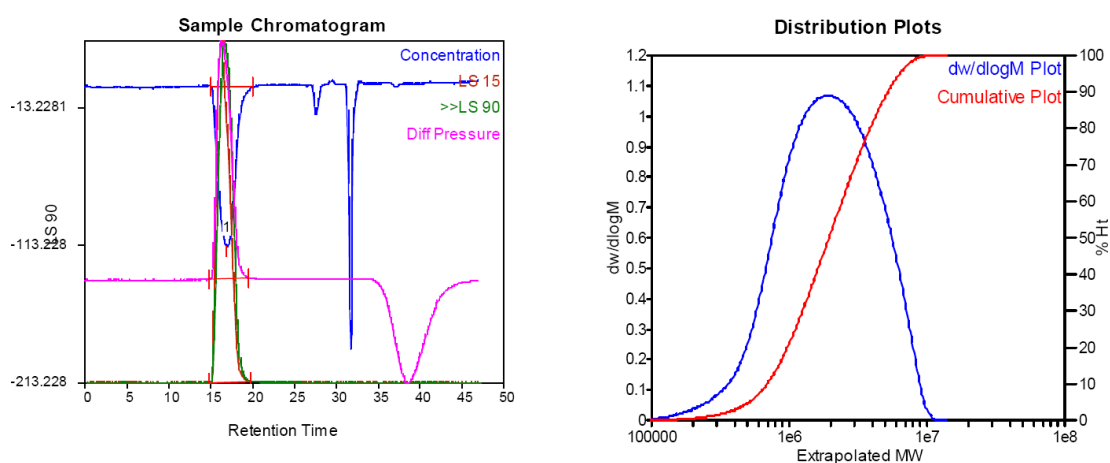

### MW Averages

| Peak No | Mp      | Mn      | Mw      | Mz      | Mz+1    | Mv      | PD      |
|---------|---------|---------|---------|---------|---------|---------|---------|
| 1       | 1826421 | 1355615 | 2478732 | 3833770 | 5055964 | 2215060 | 1.82849 |

### Processed Peaks

| Peak No | Name          | Start RT (mins) | Max RT (mins) | End RT (mins) | Pk Height (mV) | % Height | Area (mV.secs) | % Area |
|---------|---------------|-----------------|---------------|---------------|----------------|----------|----------------|--------|
| 1       | Concentration | 15.02           | 16.95         | 20.02         | -9.87214       | 0        | 1329.38        | 100    |
| 2       | LS 15         | 14.83           | 16.07         | 19.85         | 138.677        | 0        | 16080.2        | 100    |
| 3       | LS 90         | 14.83           | 16.68         | 19.88         | 247.451        | 0        | 30679.7        | 100    |
| 4       | Diff Pressure | 14.83           | 16.35         | 19.57         | 425.559        | 0        | 50728.8        | 100    |

**Figure S92.** GPC trace of the polymer from table 1, entry 27.

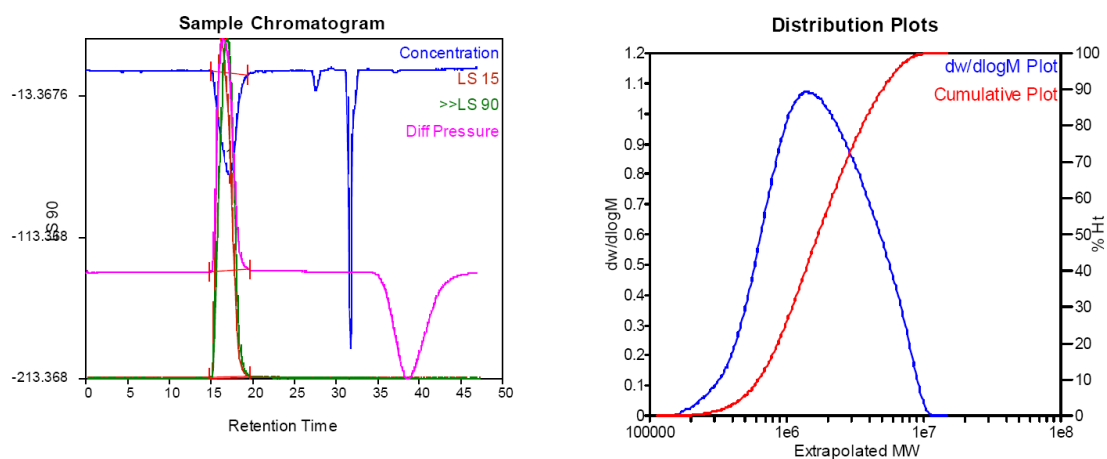

### MW Averages

| Peak No | Mp      | Mn      | Mw      | Mz      | Mz+1    | Mv      | PD      |
|---------|---------|---------|---------|---------|---------|---------|---------|
| 1       | 1369354 | 1257330 | 2293526 | 3741206 | 5116978 | 2039536 | 1.82412 |

### Processed Peaks

| Peak No | Name          | Start RT (mins) | Max RT (mins) | End RT (mins) | Pk Height (mV) | % Height | Area (mV.secs) | % Area |
|---------|---------------|-----------------|---------------|---------------|----------------|----------|----------------|--------|
| 1       | Concentration | 15.07           | 17.22         | 19.45         | -10.419        | 0        | 1355.6         | 100    |
| 2       | LS 15         | 14.83           | 16.13         | 19.68         | 122.876        | 0        | 15299.8        | 100    |
| 3       | LS 90         | 14.85           | 16.92         | 19.75         | 240.112        | 0        | 30278.6        | 100    |
| 4       | Diff Pressure | 14.80           | 16.50         | 19.65         | 403.73         | 0        | 51554.1        | 100    |

**Figure S93.** GPC trace of the polymer from table 1, entry 28.

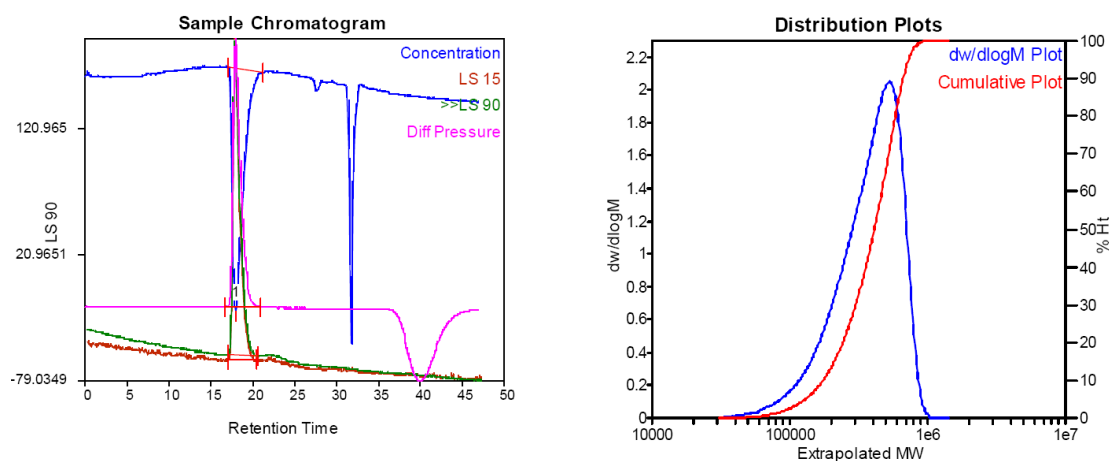

### MW Averages

| Peak No | Mp     | Mn     | Mw     | Mz     | Mz+1   | Mv     | PD      |
|---------|--------|--------|--------|--------|--------|--------|---------|
| 1       | 528975 | 308212 | 414338 | 495868 | 556862 | 400921 | 1.34433 |

### Processed Peaks

| Peak No | Name          | Start RT (mins) | Max RT (mins) | End RT (mins) | Pk Height (mV) | % Height | Area (mV.secs) | % Area |
|---------|---------------|-----------------|---------------|---------------|----------------|----------|----------------|--------|
| 1       | Concentration | 17.00           | 17.93         | 21.30         | -17.3467       | 0        | 1374.3         | 100    |
| 2       | LS 15         | 17.05           | 17.87         | 20.43         | 63.906         | 0        | 3656.97        | 100    |
| 3       | LS 90         | 17.00           | 17.87         | 20.55         | 251.237        | 0        | 14881.5        | 100    |
| 4       | Diff Pressure | 16.77           | 17.88         | 21.00         | 228.743        | 0        | 14676.7        | 100    |

**Figure S94.** GPC trace of the polymer from table 1, entry 29.

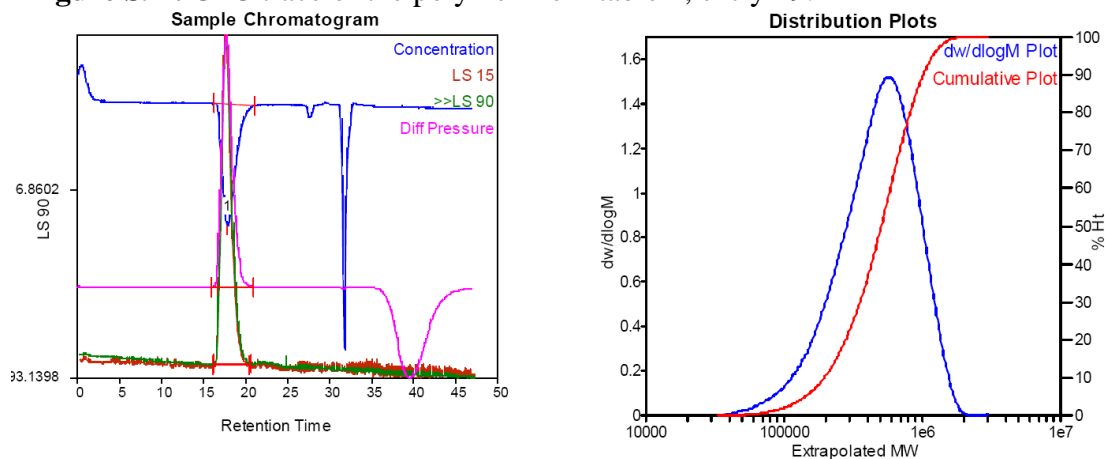

### MW Averages

| Peak No | Mp     | Mn     | Mw     | Mz     | Mz+1   | Mv     | PD      |
|---------|--------|--------|--------|--------|--------|--------|---------|
| 1       | 564174 | 367609 | 558688 | 745427 | 916280 | 531971 | 1.51979 |

### Processed Peaks

| Peak No | Name          | Start RT (mins) | Max RT (mins) | End RT (mins) | Pk Height (mV) | % Height | Area (mV.secs) | % Area |
|---------|---------------|-----------------|---------------|---------------|----------------|----------|----------------|--------|
| 1       | Concentration | 16.25           | 17.88         | 21.07         | -11.0756       | 0        | 1136.14        | 100    |
| 2       | LS 15         | 16.12           | 17.57         | 20.53         | 48.3149        | 0        | 4107.33        | 100    |
| 3       | LS 90         | 16.27           | 17.67         | 20.62         | 174.838        | 0        | 15043.6        | 100    |
| 4       | Diff Pressure | 16.00           | 17.65         | 20.92         | 170.159        | 0        | 15236.6        | 100    |

**Figure S95.** GPC trace of the polymer from table 1, entry 30.

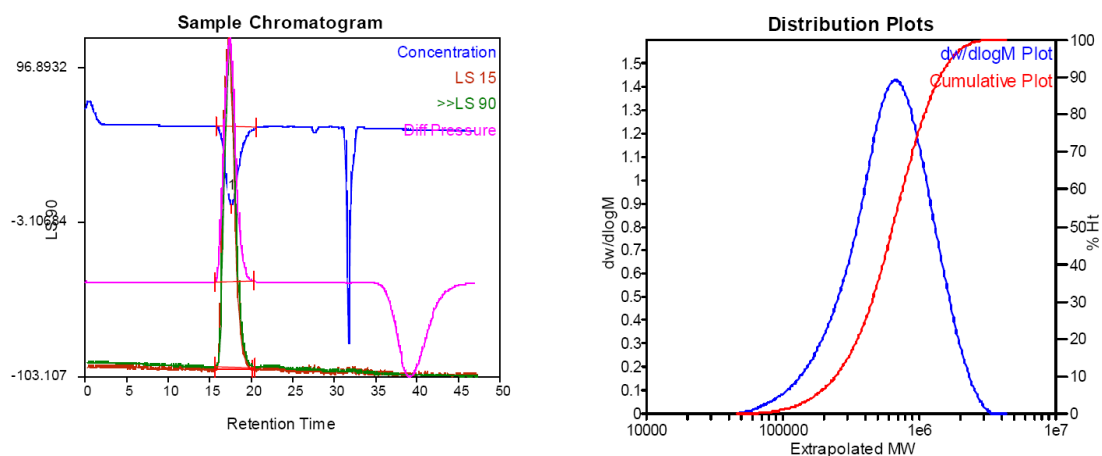

### MW Averages

| Peak No | Mp     | Mn     | Mw     | Mz      | Mz+1    | Mv     | PD      |
|---------|--------|--------|--------|---------|---------|--------|---------|
| 1       | 674920 | 465972 | 746336 | 1058557 | 1374231 | 700158 | 1.60167 |

### Processed Peaks

| Peak No | Name          | Start RT (mins) | Max RT (mins) | End RT (mins) | Pk Height (mV) | % Height | Area (mV.secs) | % Area |
|---------|---------------|-----------------|---------------|---------------|----------------|----------|----------------|--------|
| 1       | Concentration | 15.83           | 17.63         | 20.58         | -11.4477       | 0        | 1218.53        | 100    |
| 2       | LS 15         | 15.62           | 17.30         | 20.22         | 65.9939        | 0        | 6434.65        | 100    |
| 3       | LS 90         | 15.60           | 17.38         | 20.43         | 212.708        | 0        | 20278.7        | 100    |
| 4       | Diff Pressure | 15.60           | 17.37         | 20.30         | 222.805        | 0        | 21997.6        | 100    |

**Figure S96.** GPC trace of the polymer from table 1, entry 31.

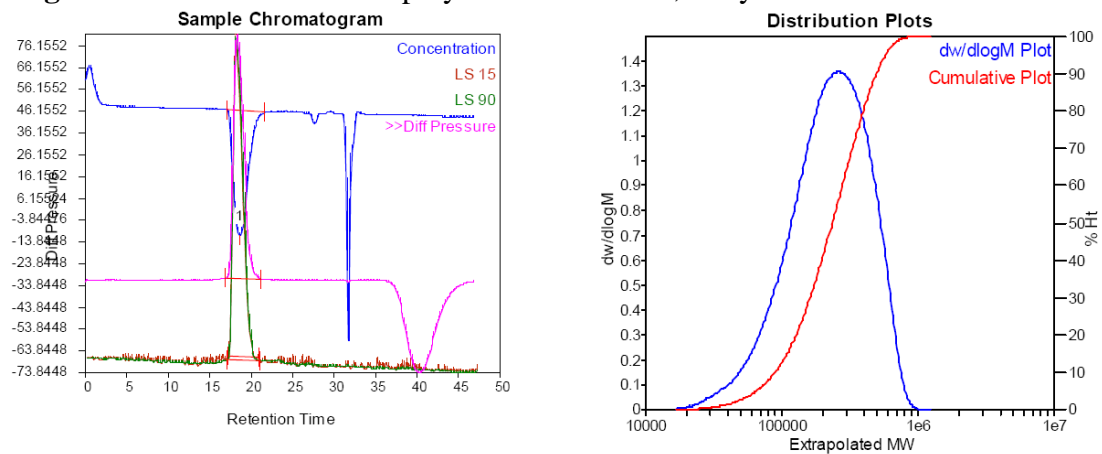

### MW Averages

| Peak No | Mp     | Mn     | Mw     | Mz     | Mz+1   | Mv     | PD      |
|---------|--------|--------|--------|--------|--------|--------|---------|
| 1       | 254840 | 169840 | 264517 | 357918 | 438756 | 249745 | 1.55745 |

### Processed Peaks

| Peak No | Name          | Start RT (mins) | Max RT (mins) | End RT (mins) | Pk Height (mV) | % Height | Area (mV.secs) | % Area |
|---------|---------------|-----------------|---------------|---------------|----------------|----------|----------------|--------|
| 1       | Concentration | 17.10           | 18.63         | 21.53         | -11.76         | 0        | 1272.05        | 100    |
| 2       | LS 15         | 17.17           | 18.17         | 20.92         | 26.1584        | 0        | 2154.06        | 100    |
| 3       | LS 90         | 17.05           | 18.20         | 21.03         | 108.723        | 0        | 9301.65        | 100    |
| 4       | Diff Pressure | 16.95           | 18.25         | 21.28         | 111.764        | 0        | 10208.1        | 100    |

**Figure S97.** GPC trace of the polymer from table 2, entry 1.

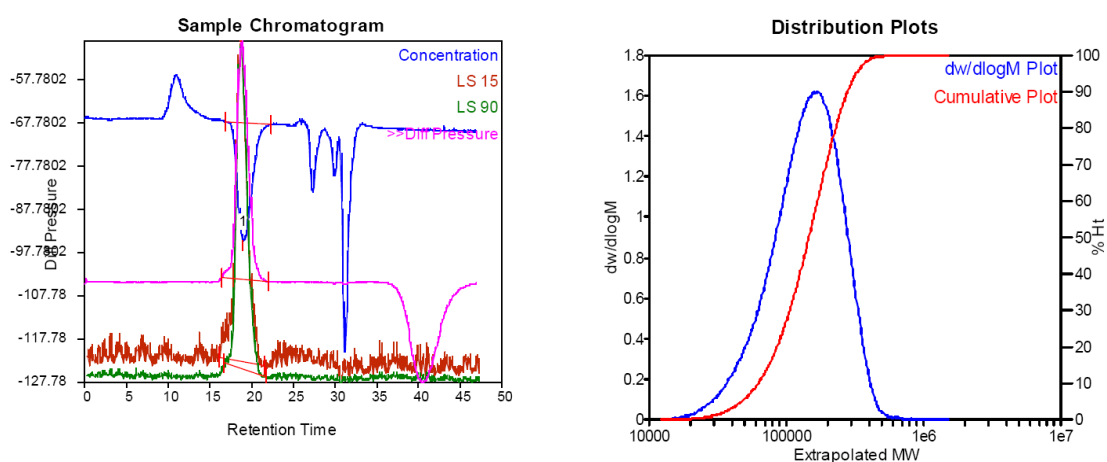

### MW Averages

| Peak No | Mp     | Mn     | Mw     | Mz     | Mz+1   | Mv     | PD      |
|---------|--------|--------|--------|--------|--------|--------|---------|
| 1       | 166564 | 113703 | 160026 | 206440 | 251206 | 153838 | 1.40741 |

### Processed Peaks

| Peak No | Name          | Start RT (mins) | Max RT (mins) | End RT (mins) | Pk Height (mV) | % Height | Area (mV.secs) | % Area |
|---------|---------------|-----------------|---------------|---------------|----------------|----------|----------------|--------|
| 1       | Concentration | 16.87           | 18.98         | 22.38         | -9.6272        | 0        | 1073.2         | 100    |
| 2       | LS 15         | 16.10           | 18.65         | 21.60         | 11.7051        | 0        | 1184.18        | 100    |
| 3       | LS 90         | 16.75           | 18.72         | 21.72         | 50.1494        | 0        | 4516.65        | 100    |
| 4       | Diff Pressure | 16.33           | 18.75         | 22.00         | 55.2498        | 0        | 5408.14        | 100    |

**Figure S98.** GPC trace of the polymer from table 2, entry 2.

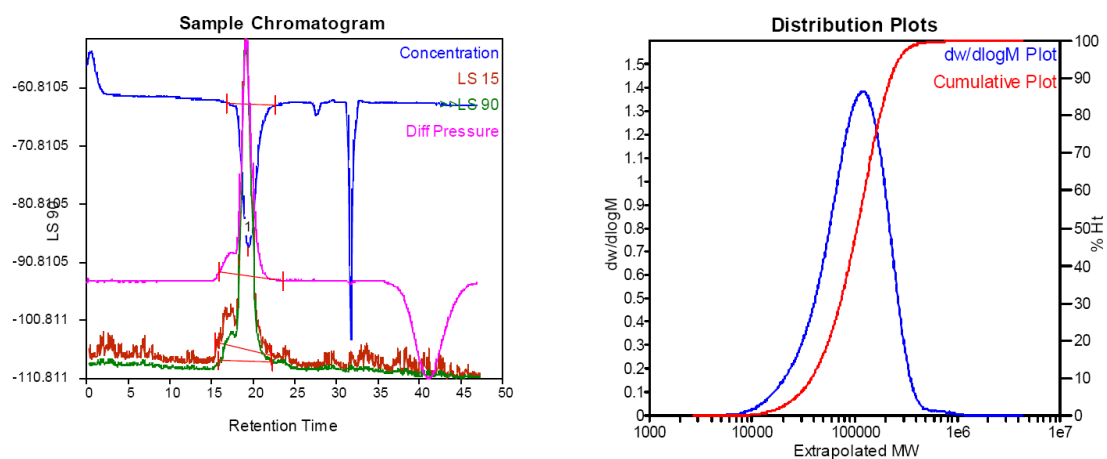

### MW Averages

| Peak No | Mp     | Mn    | Mw     | Mz     | Mz+1   | Mv     | PD      |
|---------|--------|-------|--------|--------|--------|--------|---------|
| 1       | 118850 | 73618 | 122343 | 184469 | 285966 | 116278 | 1.66185 |

### Processed Peaks

| Peak No | Name          | Start RT (mins) | Max RT (mins) | End RT (mins) | Pk Height (mV) | % Height | Area (mV.secs) | % Area |
|---------|---------------|-----------------|---------------|---------------|----------------|----------|----------------|--------|
| 1       | Concentration | 16.83           | 19.38         | 22.70         | -12.213        | 0        | 1328.55        | 100    |
| 2       | LS 15         | 15.47           | 19.03         | 22.20         | 12.0472        | 0        | 1182.12        | 100    |
| 3       | LS 90         | 15.83           | 19.03         | 22.20         | 55.6029        | 0        | 5180.4         | 100    |
| 4       | Diff Pressure | 15.95           | 19.08         | 23.52         | 64.264         | 0        | 6382.81        | 100    |

**Figure S99.** GPC trace of the polymer from table 2, entry 3.

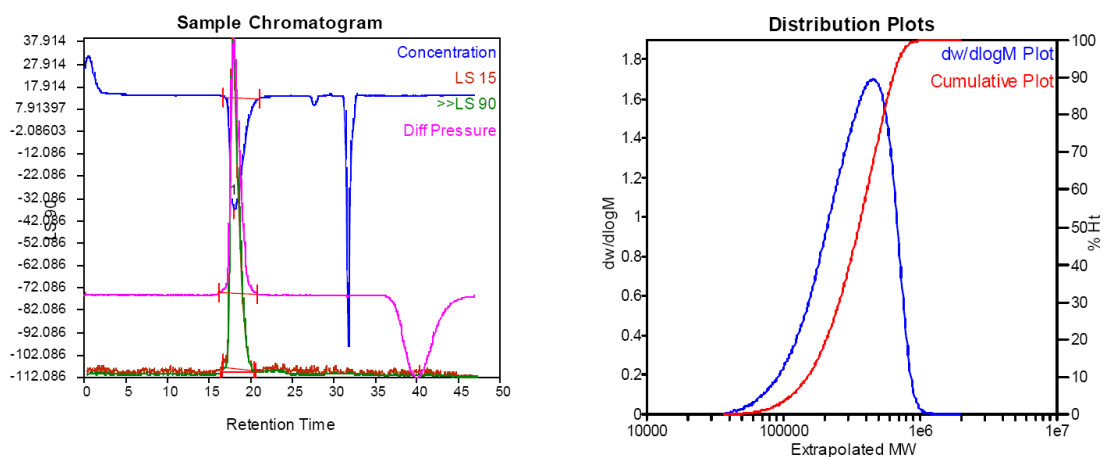

### MW Averages

| Peak No | Mp     | Mn     | Mw     | Mz     | Mz+1   | Mv     | PD     |
|---------|--------|--------|--------|--------|--------|--------|--------|
| 1       | 458561 | 272271 | 373748 | 462842 | 535228 | 362578 | 1.3727 |

### Processed Peaks

| Peak No | Name          | Start RT (mins) | Max RT (mins) | End RT (mins) | Pk Height (mV) | % Height | Area (mV.secs) | % Area |
|---------|---------------|-----------------|---------------|---------------|----------------|----------|----------------|--------|
| 1       | Concentration | 16.75           | 18.03         | 21.03         | -11.2236       | 0        | 1080.64        | 100    |
| 2       | LS 15         | 16.72           | 17.82         | 20.47         | 38.0388        | 0        | 2656.53        | 100    |
| 3       | LS 90         | 16.53           | 17.87         | 20.58         | 149.517        | 0        | 10819.2        | 100    |
| 4       | Diff Pressure | 16.30           | 17.88         | 20.80         | 146.117        | 0        | 11310.5        | 100    |

**Figure S100.** GPC trace of the polymer from table 2, entry 4.

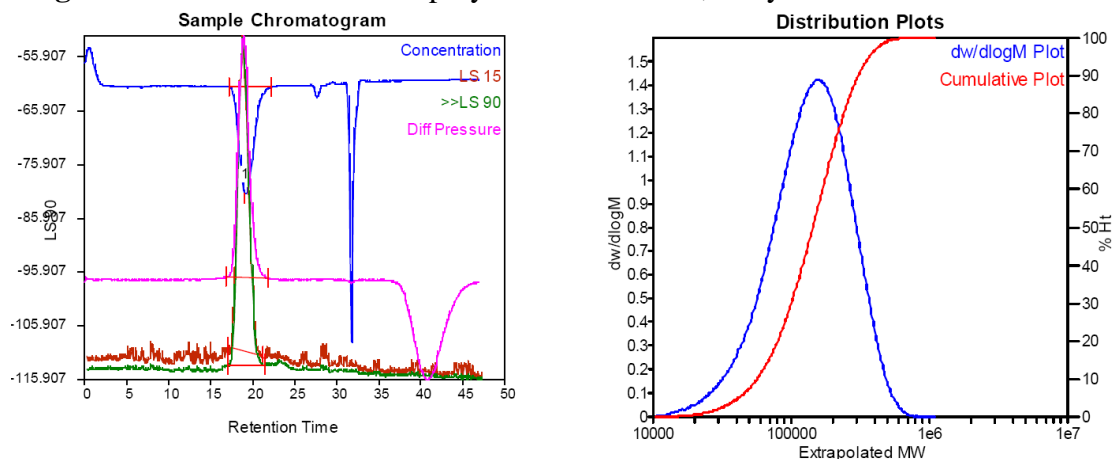

### MW Averages

| Peak No | Mp     | Mn     | Mw     | Mz     | Mz+1   | Mv     | PD      |
|---------|--------|--------|--------|--------|--------|--------|---------|
| 1       | 154430 | 106271 | 164551 | 227868 | 291242 | 157323 | 1.54841 |

### Processed Peaks

| Peak No | Name          | Start RT (mins) | Max RT (mins) | End RT (mins) | Pk Height (mV) | % Height | Area (mV.secs) | % Area |
|---------|---------------|-----------------|---------------|---------------|----------------|----------|----------------|--------|
| 1       | Concentration | 17.13           | 19.13         | 22.22         | -10.5244       | 0        | 1172.86        | 100    |
| 2       | LS 15         | 17.10           | 18.72         | 21.25         | 14.0409        | 0        | 1257.55        | 100    |
| 3       | LS 90         | 17.10           | 18.75         | 21.40         | 61.1789        | 0        | 5631.8         | 100    |
| 4       | Diff Pressure | 16.88           | 18.80         | 21.88         | 66.9535        | 0        | 6632.24        | 100    |

**Figure S101.** GPC trace of the polymer from table 2, entry 6.

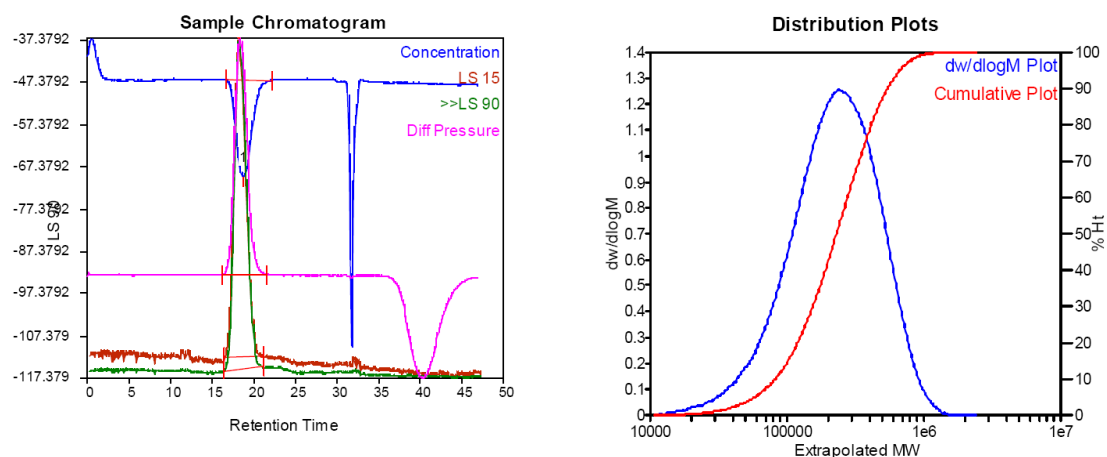

#### MW Averages

| Peak No | Mp     | Mn     | Mw     | Mz     | Mz+1   | Mv     | PD      |
|---------|--------|--------|--------|--------|--------|--------|---------|
| 1       | 240789 | 159118 | 276868 | 412061 | 550391 | 259958 | 1.74002 |

#### Processed Peaks

| Peak No | Name          | Start RT (mins) | Max RT (mins) | End RT (mins) | Pk Height (mV) | % Height | Area (mV.secs) | % Area |
|---------|---------------|-----------------|---------------|---------------|----------------|----------|----------------|--------|
| 1       | Concentration | 16.68           | 18.73         | 22.12         | -8.83509       | 0        | 1057.91        | 100    |
| 2       | LS 15         | 16.45           | 18.17         | 21.27         | 18.8618        | 0        | 1896.45        | 100    |
| 3       | LS 90         | 16.37           | 18.17         | 21.32         | 78.7007        | 0        | 7983.99        | 100    |
| 4       | Diff Pressure | 16.23           | 18.27         | 21.52         | 79.1671        | 0        | 8550.57        | 100    |

**Figure S102.** GPC trace of the polymer from table 2, entry 7.

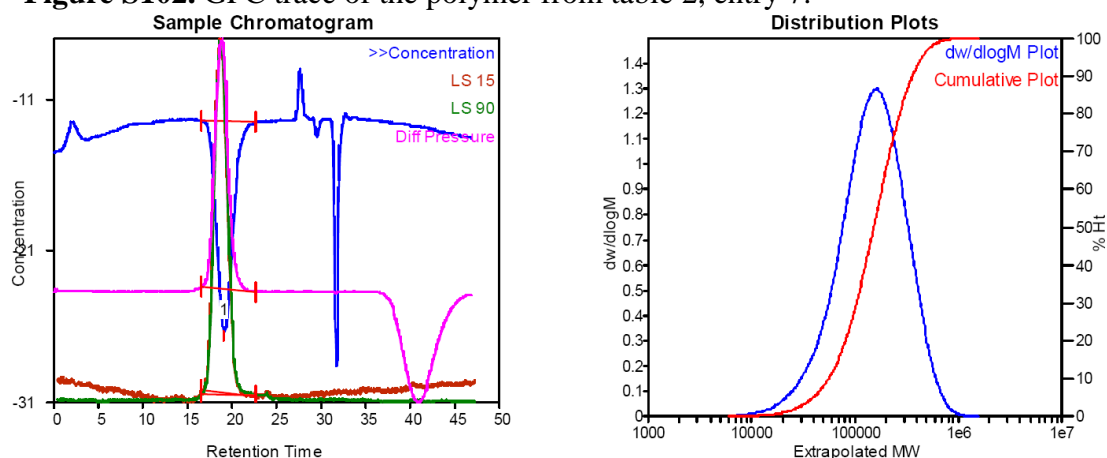

#### MW Averages

| Peak No | Mp     | Mn     | Mw     | Mz     | Mz+1   | Mv     | PD      |
|---------|--------|--------|--------|--------|--------|--------|---------|
| 1       | 162329 | 106863 | 184532 | 278456 | 383754 | 174112 | 1.72681 |

#### Processed Peaks

| Peak No | Name          | Start RT (mins) | Max RT (mins) | End RT (mins) | Pk Height (mV) | % Height | Area (mV.secs) | % Area |
|---------|---------------|-----------------|---------------|---------------|----------------|----------|----------------|--------|
| 1       | Concentration | 16.57           | 19.07         | 22.72         | -13.8327       | 0        | 1631.51        | 100    |
| 2       | LS 15         | 16.57           | 18.57         | 22.72         | 18.9499        | 0        | 1998.86        | 100    |
| 3       | LS 90         | 16.57           | 18.62         | 22.72         | 84.4463        | 0        | 8889.98        | 100    |
| 4       | Diff Pressure | 16.57           | 18.73         | 22.72         | 89.1549        | 0        | 9699.26        | 100    |

**Figure S103.** GPC trace of the polymer from table 2, entry 8.

## 7 DSC of polymer and copolymer

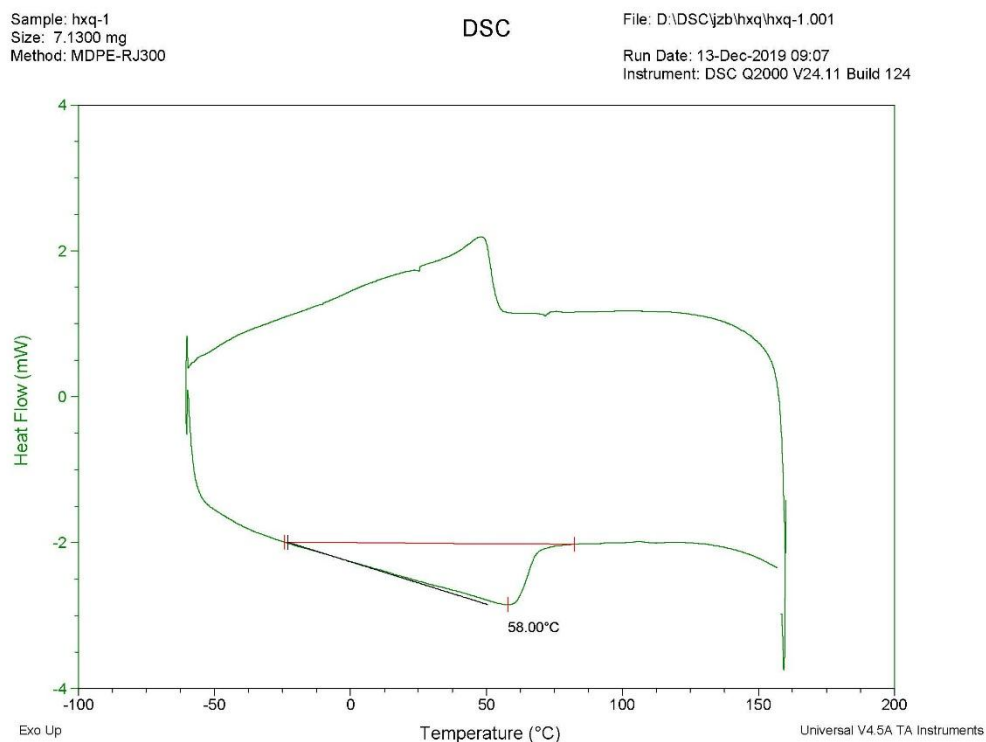

**Figure S104.** DSC data of the polymer from table 1, entry 1.

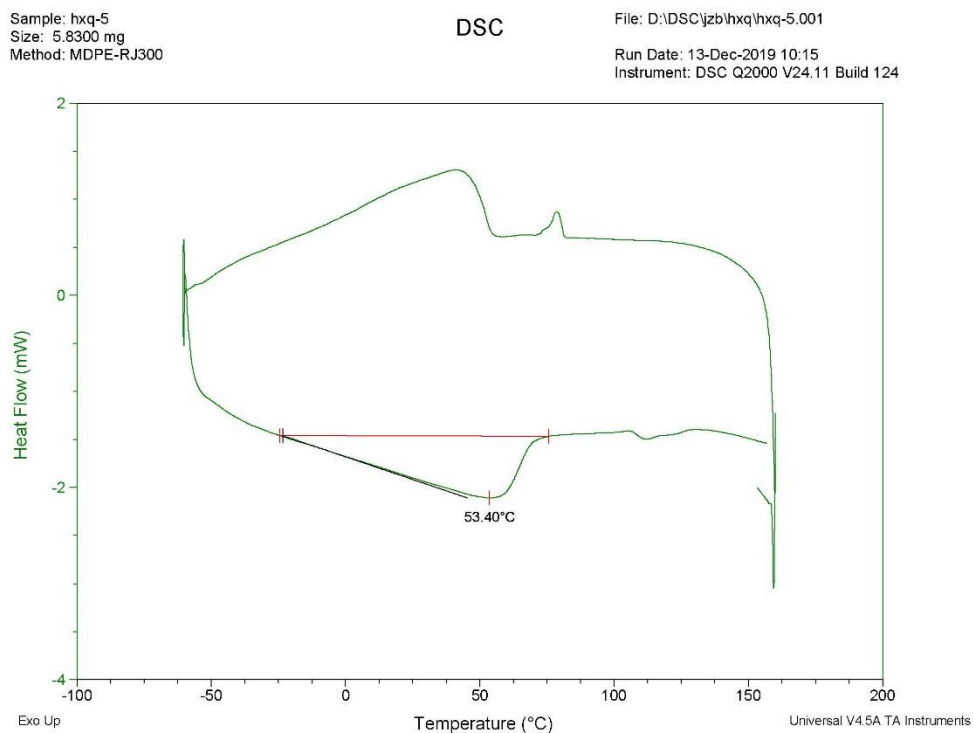

**Figure S105.** DSC data of the polymer from table 1, entry 9.

Sample: hxq-9  
Size: 7.5800 mg  
Method: MDPE-RJ300

DSC

File: D:\DSC\jzb\hxq\hxq-9.001  
Run Date: 13-Dec-2019 11:22  
Instrument: DSC Q2000 V24.11 Build 124

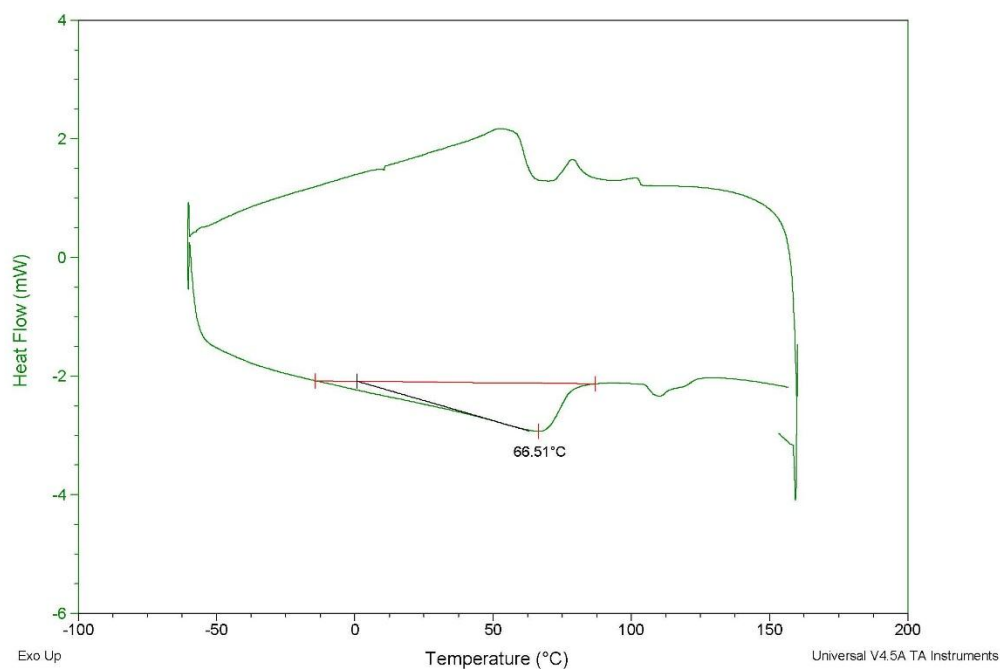

**Figure S106.** DSC data of the polymer from table 1, entry 13.

Sample: hxq-10  
Size: 8.6100 mg  
Method: MDPE-RJ300

DSC

File: D:\DSC\jzb\hxq\hxq-10.001  
Run Date: 13-Dec-2019 12:30  
Instrument: DSC Q2000 V24.11 Build 124

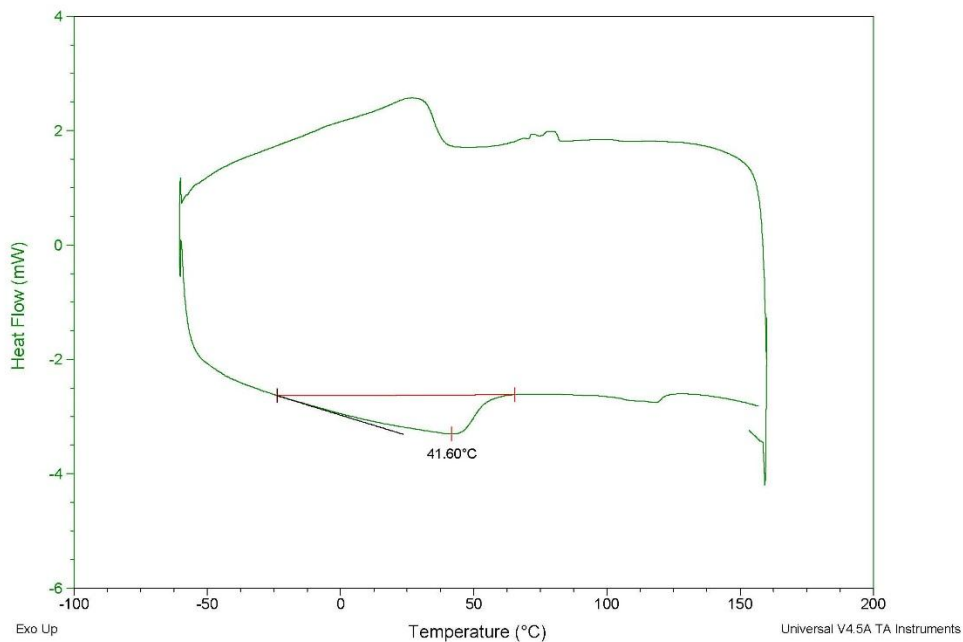

**Figure S107.** DSC data of the polymer from table 1, entry 14.

## 8 MALDI-TOF-MS of complex Ni

D:\Data\2019\1015\HXQ-1\0\_O6\1

Comment 1 DCTB

Comment 2

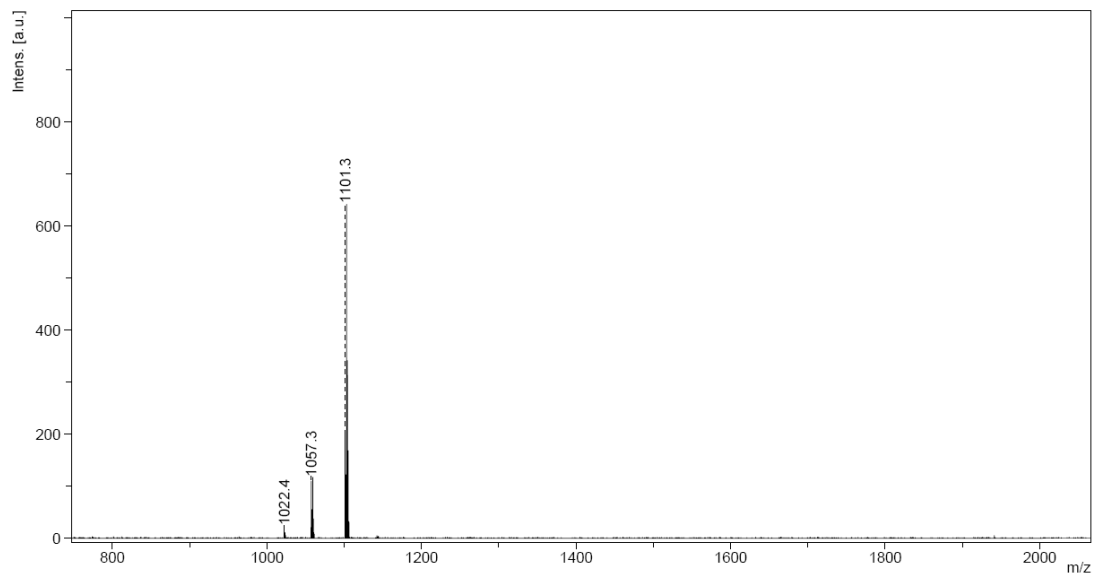

Bruker Daltonics flexAnalysis

printed: 10/15/2019 4:23:05 PM

**Figure S108.** MALDI-TOF-MS of Cat1.

D:\Data\2019\0415\HXQ-1\0\_M12\1

Comment 1 DCTB

Comment 2

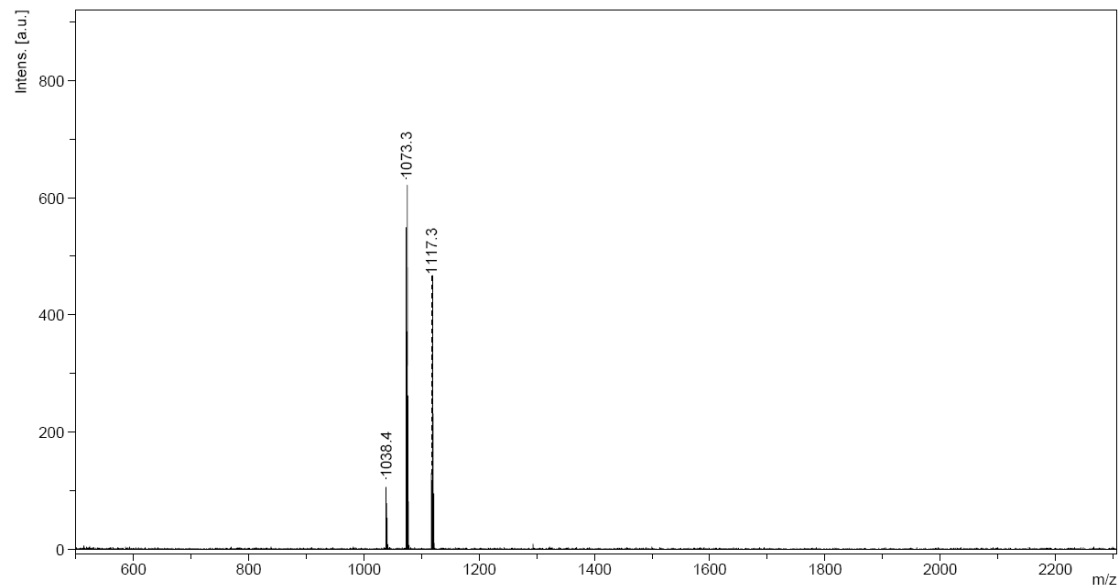

Bruker Daltonics flexAnalysis

printed: 4/15/2019 4:08:54 PM

**Figure S109.** MALDI-TOF-MS of Cat2.

D:\Data\2019\1015\HXQ-2\0\_O8\1

Comment 1 DCTB

Comment 2

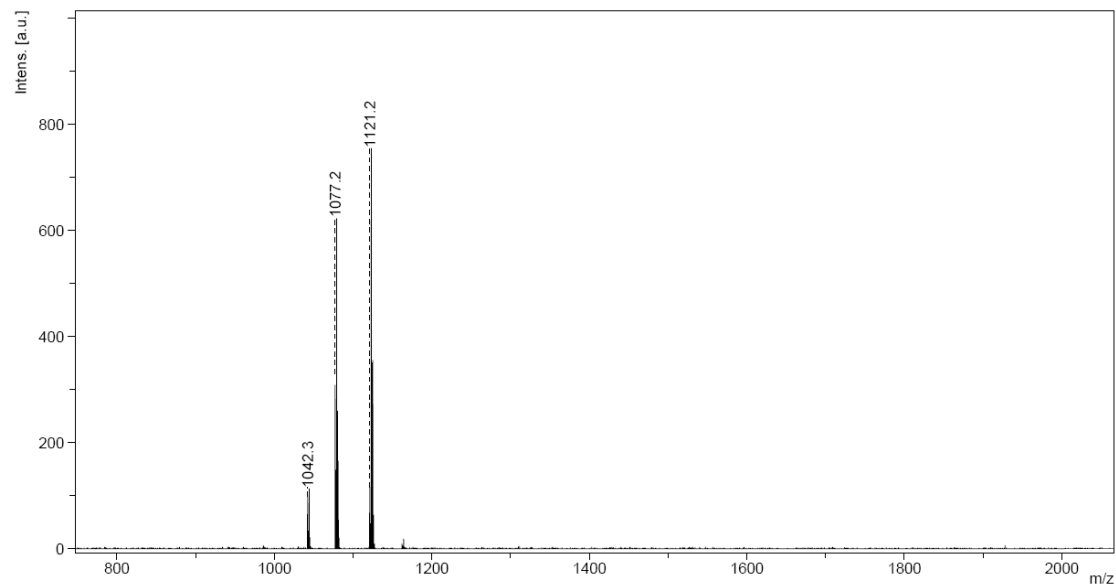

Bruker Daltonics flexAnalysis

printed: 10/15/2019 4:23:43 PM

**Figure S110. MALDI-TOF-MS of Cat3.**

D:\Data\2019\1015\HXQ-3\10\_O9\1

Comment 1 DCTB

Comment 2

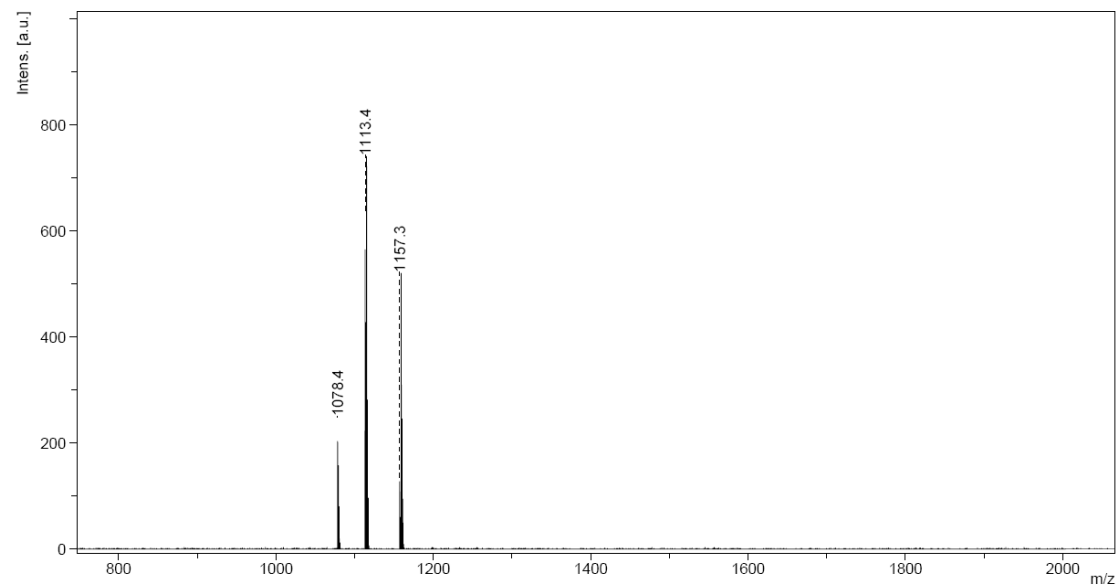

Bruker Daltonics flexAnalysis

printed: 10/15/2019 4:24:04 PM

**Figure S111. MALDI-TOF-MS of Cat4.**

D:\Data\2019\1015\HXQ-4\0\_O10\1

Comment 1 DCTB

Comment 2

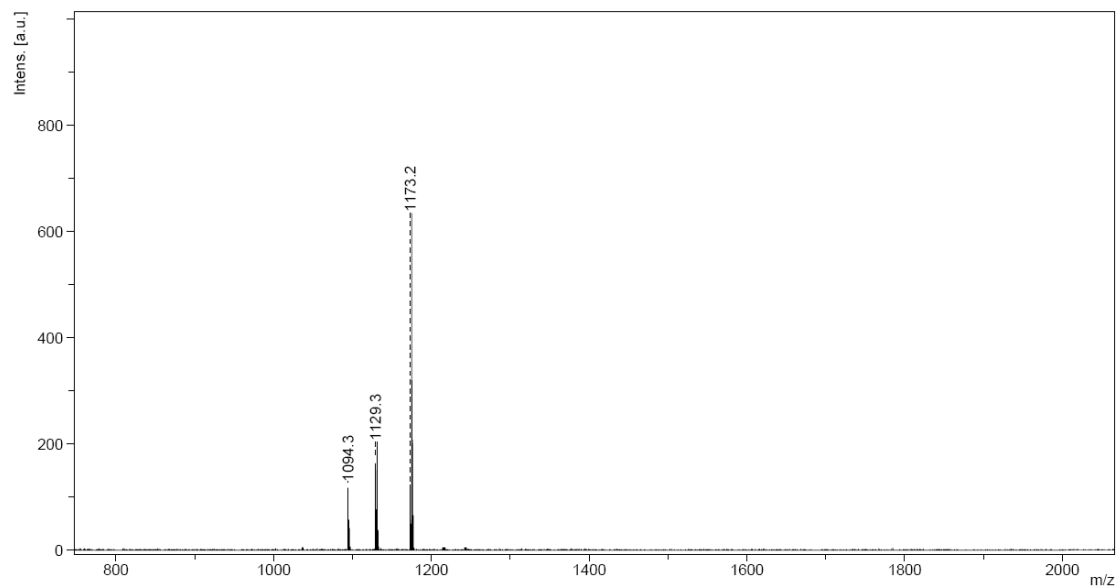

Bruker Daltonics flexAnalysis

printed: 10/15/2019 4:24:24 PM

**Figure S112.** MALDI-TOF-MS of Cat5.

## 9 Crystallographic data and figures of crystal structure

**Table S2. Crystallographic data for Cat1 and Cat5.**

|                                                                         | <b>Cat1 · CHCl<sub>3</sub></b>                                                     | <b>Cat5</b>                                                                       |
|-------------------------------------------------------------------------|------------------------------------------------------------------------------------|-----------------------------------------------------------------------------------|
| Formula                                                                 | C <sub>73</sub> H <sub>57</sub> Br <sub>2</sub> Cl <sub>3</sub> N <sub>2</sub> NiO | C <sub>72</sub> H <sub>52</sub> Br <sub>2</sub> F <sub>4</sub> N <sub>2</sub> NiO |
| Formula weight                                                          | 1303.08                                                                            | 1255.68                                                                           |
| Crystal dimensions (mm <sup>3</sup> )                                   | 0.20 × 0.04 × 0.03                                                                 | 0.30 × 0.22 × 0.19                                                                |
| Crystal system                                                          | monoclinic                                                                         | triclinic                                                                         |
| Space group                                                             | P 1 21/c 1                                                                         | P -1                                                                              |
| a (Å)                                                                   | 26.3082(11)                                                                        | 11.6968(8)                                                                        |
| b (Å)                                                                   | 13.2167(6)                                                                         | 14.6139(10)                                                                       |
| c (Å)                                                                   | 19.6610(8)                                                                         | 20.2591(13)                                                                       |
| α (°)                                                                   | 90                                                                                 | 93.384(3)                                                                         |
| β (°)                                                                   | 94.330(2)                                                                          | 95.778(3)                                                                         |
| γ (°)                                                                   | 90                                                                                 | 100.036(3)                                                                        |
| Volume (Å <sup>3</sup> )                                                | 6816.8(5)                                                                          | 3382.3(4)                                                                         |
| Z                                                                       | 4                                                                                  | 2                                                                                 |
| T (K)                                                                   | 173(2)                                                                             | 173(2)                                                                            |
| D <sub>calcd</sub> (g cm <sup>-3</sup> )                                | 1.270                                                                              | 1.233                                                                             |
| μ (mm <sup>-1</sup> )                                                   | 3.188                                                                              | 2.218                                                                             |
| F (000)                                                                 | 2664                                                                               | 1280                                                                              |
| No. of rflns. collected                                                 | 30134                                                                              | 23727                                                                             |
| No. of indep. rflns. /R <sub>int</sub>                                  | 9623 / 0.0350                                                                      | 9503 / 0.0273                                                                     |
| No. of obsd. rflns. [I <sub>0</sub> > 2σ(I <sub>0</sub> )]              | 9109                                                                               | 8630                                                                              |
| Data / restraints / parameters                                          | 9623 / 0 / 744                                                                     | 9503 / 0 / 743                                                                    |
| R <sub>1</sub> / wR <sub>2</sub> [I <sub>0</sub> > 2σ(I <sub>0</sub> )] | 0.0552 / 0.1477                                                                    | 0.0408 / 0.0976                                                                   |
| R <sub>1</sub> / wR <sub>2</sub> (all data)                             | 0.0568 / 0.1492                                                                    | 0.0450 / 0.1016                                                                   |
| GOF (on F <sup>2</sup> )                                                | 1.091                                                                              | 1.059                                                                             |
| Largest diff. peak and hole (e Å <sup>-3</sup> )                        | 2.416 / -0.377                                                                     | 0.412 / -0.323                                                                    |
| CCDC No.                                                                | 1975354                                                                            | 1975355                                                                           |

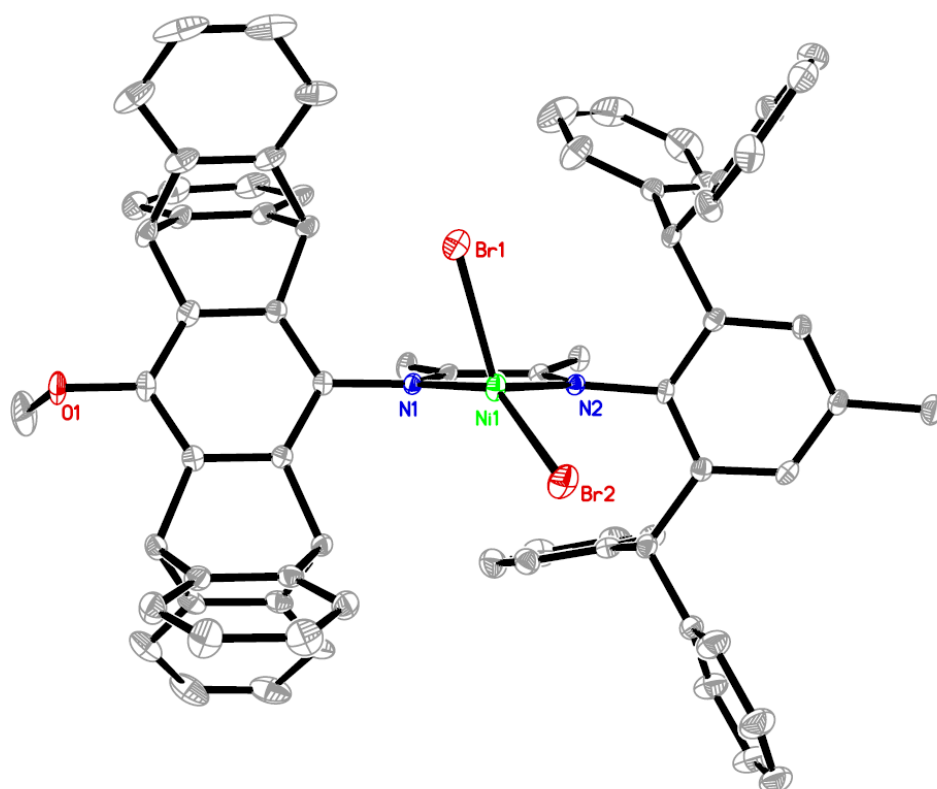

**Figure S113.** Crystal structure of **Cat1**.

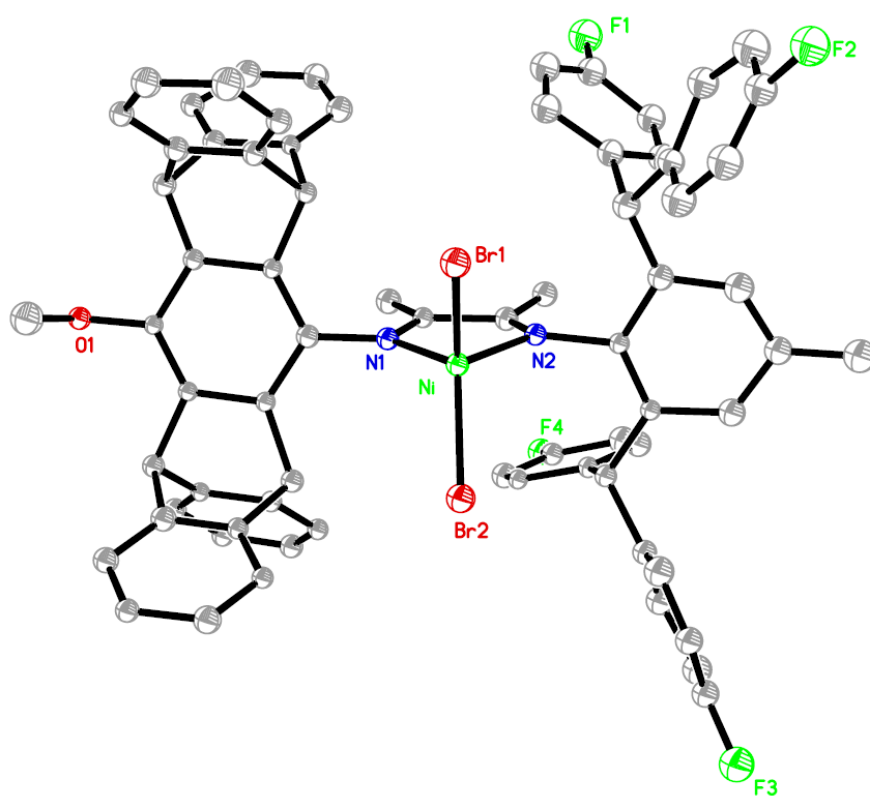

**Figure S114.** Crystal structure of **Cat5**.

## 10 References

- (1) SMART, version 5.054; Bruker AXS Inc.: Madison, WI, 2000.
- (2) SAINT and SADABS, version 6.22; Bruker AXS Inc.: Madison, WI, 2000.
- (3) a) G. M. Sheldrick, *Acta Cryst.* **2015**, *C71*, 3-8. b) O. V. Dolomanov, L. J. Bourhis, R. J. Gildea, J. A. K. Howard, H. Puschmann, *J. Appl. Cryst.* **2009**, *42*, 339-341.
- (4) Spek, A. L. *Acta Cryst.* **2015**, *C71*, 9-18.
- (5) Dai, S. Y.; Sui, X. L.; Chen, C. L. *Angew. Chem. Int. Ed.* **2015**, *54*, 9948–9953.
- (6) Guo, L. H.; Kong, W. Y.; Xu, Y. J.; Yang, Y. L.; Ma, R.; Cong, L.; Dai, S. Y.; Liu, Z. *Journal of Organometallic Chemistry* **2018**, *859*, 58-67.
- (7) Savka, R.; Foro, S.; Plenio, H. *Dalton Transactions*, **2016**, *45*, 11015-11024.
